# Supplementary material for: Lower functional redundancy in “narrow” than “broad” functions in global soil metagenomics
Source: Copernicus journal article supplement (doi:10.5194/soil-8-297-2022), 2022-04-08
Supplement: Supplementary file 1 [file soil-8-297-2022-supplement.zip]

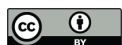

## *Supplement of*

# **Lower functional redundancy in “narrow” than “broad” functions in global soil metagenomics**

**Huaihai Chen et al.**

*Correspondence to:* Huaihai Chen (chenhh68@mail.sysu.edu.cn) and Jiajiang Lin (jjlin@fjnu.edu.cn)

- soil-8-297-2022-supplement-title-page.pdf
- SI
  - SI.docx
  - Supplementary Table 1.xlsx
  - Table S1.xlsx

The copyright of individual parts of the supplement might differ from the article licence.
