# Supplementary material for: Lower functional redundancy in “narrow” than “broad” functions in global soil metagenomics
Source: Copernicus journal article supplement (doi:10.5194/soil-8-297-2022), 2022-04-08
Supplement: Supplementary file 2 [file soil-8-297-2022-supplement.zip]

Archive with 5 entries (4 files):
- SI/
- SI/Table S1.xlsx
- SI/Supplementary Table 1.xlsx
- SI/SI.docx
- soil-8-297-2022-supplement-title-page.pdf
