# Supplementary material for: Lower functional redundancy in “narrow” than “broad” functions in global soil metagenomics
Source: Copernicus journal article supplement (doi:10.5194/soil-8-297-2022), 2022-04-08
Supplement: Supplementary file 2 [file Supplementary Table 1.xlsx]

## Sheet: Sheet1
Supplementary Table 1. Information of MG-RAST soil metagenomes. Data are extracted from publications used in this study including study ID, MG-RAST ID, sample name, publication, bp, reads, latitude and longitude, climate zone, climate code, mean annual temperature (MAT, °C), mean annual precipitation (MAP, mm yr-1), soil C, pH, Sand (%), Silt (%), Clay (%), and hits in Subsystems and RefSeq datab…
Study ID	MG-RAST ID	Sample	Publication*	bp	Reads	LAT	LONG	Climate zone	Climate code	MAT	MAP	Soil C	pH	Sand	Silt	Clay	Subsystems hits	RefSeq hits	AAD hits	CHO hits	CBS hits	CVPGP hits	Protein hits	N hits	P hits	K hits	S hits	Fe hits
mgp134	4451033	BRMgv-1Clean	Andreote 2012	58801025	249993	-23.8969	-46.2078	Humid subtropical	Cfa	21.3	2709	75	4.9	53	18	29	287850	592700	27645	33115	35110	15110	33651	3767	3484	1158	3161	1073
mgp134	4451034	BRMgv-2Clean	Andreote 2012	55077381	231233	-23.9017	-45.2508	Humid subtropical	Cfa	20.9	2120	75	4.9	53	18	29	44351	107610	4023	5062	4881	2151	3998	538	551	181	496	198
mgp134	4451035	BrMgv-3Clean	Andreote 2012	53292298	214921	-25.0839	-45.2508	Humid subtropical	Cfa	21.3	2120	75	4.9	53	18	29	39278	95675	3528	4514	4478	1852	3509	584	482	167	408	151
mgp134	4451036	BrMgv-4Clean	Andreote 2012	48522914	217605	-25.0839	-47.9506	Humid subtropical	Cfa	22	2412	30	4.9	66	15	20	40305	96636	3599	4529	4642	1938	3664	501	504	170	362	168
mgp12344	4615008	A1_SNWR_3_aclipped	Argiroff 2017	3072781180	20762035	43.349	-84.0285	Warm summer continental or hemiboreal	Dfb	8.4	770	103	6.8	40	37	24	3887400	10184000	354860	454660	432490	185120	289000	50102	44028	23608	37621	19108
mgp12344	4615009	A2_SNWR_3_aclipped	Argiroff 2017	2843747332	19214509	43.3491	-84.0285	Warm summer continental or hemiboreal	Dfb	8.4	770	103	6.8	40	37	24	3641200	9479300	334460	429200	403700	173910	271720	47010	41825	20915	34433	17674
mgp12344	4615010	A3_SNWR_3_aclipped	Argiroff 2017	2788642492	18842179	43.349	-84.0284	Warm summer continental or hemiboreal	Dfb	8.4	770	103	6.8	40	37	24	3534800	9234900	322210	413360	393960	167640	264190	45431	40720	21504	34284	17032
mgp12344	4615011	B1_SNWR_3_aclipped	Argiroff 2017	2706666180	18288285	43.3575	-84.01	Warm summer continental or hemiboreal	Dfb	8.4	770	103	6.8	40	37	24	3643300	8859200	321220	412280	402150	170190	287560	45810	42088	28259	33547	14105
mgp12344	4615012	B2_SNWR_3_aclipped	Argiroff 2017	2163835036	14620507	43.3585	-84.0087	Warm summer continental or hemiboreal	Dfb	8.4	770	103	6.8	40	37	24	2924100	7220500	261750	336750	324450	137860	225890	36940	33202	22949	26964	11806
mgp12344	4615013	B3_SNWR_3_aclipped	Argiroff 2017	2506049220	16932765	43.3577	-84.0097	Warm summer continental or hemiboreal	Dfb	8.4	770	103	6.8	40	37	24	3367100	8318500	300250	384320	375780	159240	256330	42908	38408	25652	31277	13720
mgp12344	4615014	C1_SNWR_3_aclipped	Argiroff 2017	2273464556	15361247	43.3554	-84.0401	Warm summer continental or hemiboreal	Dfb	8.4	770	103	6.8	40	37	24	2966700	7069900	259810	335570	322840	137720	244710	35549	34177	22693	26512	11017
mgp12344	4615015	C2_SNWR_3_aclipped	Argiroff 2017	2360950612	15952369	43.3556	-84.0401	Warm summer continental or hemiboreal	Dfb	8.4	770	103	6.8	40	37	24	3089200	7411200	271330	353630	338050	141100	254460	36404	35972	23244	28865	11852
mgp12344	4615016	C3_SNWR_3_aclipped	Argiroff 2017	3816698592	25788504	43.3557	-84.0399	Warm summer continental or hemiboreal	Dfb	8.4	770	103	6.8	40	37	24	4941200	11869000	434780	557770	539760	226670	408180	58142	57008	36152	45374	19103
mgp2592	4509403	PF15-WS-July2012 / H4_GCCAAT_L006	Bach 2018	20524028604	203208204	41.9206	-93.7497	Hot summer continental	Dfa	8.9	842	17	6.3	26	47	26	5673100	11995000	552850	845570	583700	204550	704340	86235	76964	21510	56590	11076
mgp2592	4509407	PF23-WS-July2012 / H9_ATCACG_L008	Bach 2018	8778023120	86911120	41.9206	-93.7497	Hot summer continental	Dfa	8.9	842	17	6.3	26	47	26	2072600	4432600	205290	301710	210740	80842	235770	31689	25663	8782	20825	4178
mgp13154	4625855	CO_R10	Bell 2016	1792387478	7584499	45.681	-73.4375	Warm summer continental or hemiboreal	Dfb	5.9	971	171	6.1	45	30	26	2356600	9696900	220250	283830	242590	115270	131510	33691	24438	13434	30292	29964
mgp13154	4626132	CO_R3	Bell 2016	2211693541	9521307	45.681	-73.4375	Warm summer continental or hemiboreal	Dfb	5.9	971	171	6.1	45	30	26	2898000	11059000	268390	366030	303550	142820	166960	37803	29285	17081	35621	34104
mgp13154	4626133	CO_R4	Bell 2016	1894297276	8054077	45.681	-73.4375	Warm summer continental or hemiboreal	Dfb	5.9	971	171	6.1	45	30	26	2455300	11473000	234170	282710	247060	120050	131780	35877	24595	13102	33427	31312
mgp13154	4626134	CO_R6	Bell 2016	1843515599	8038689	45.681	-73.4375	Warm summer continental or hemiboreal	Dfb	5.9	971	171	6.1	45	30	26	2447800	11381000	235260	280350	246930	120690	130350	36585	24365	13008	33667	31569
mgp13154	4626327	CO_R8	Bell 2016	1668816265	7168268	45.681	-73.4375	Warm summer continental or hemiboreal	Dfb	5.9	971	171	6.1	45	30	26	2150800	10737000	206270	243000	214650	106120	112380	33441	20833	11299	30286	26281
mgp13154	4626321	Init_R10	Bell 2016	2248856746	10285623	45.681	-73.4375	Warm summer continental or hemiboreal	Dfb	5.9	971	171	6.1	45	30	26	2874500	10113000	266380	379120	296320	151230	161150	38610	25791	15894	32277	25322
mgp13154	4626135	Init_R3	Bell 2016	2265745719	10257340	45.681	-73.4375	Warm summer continental or hemiboreal	Dfb	5.9	971	171	6.1	45	30	26	2700800	9399000	243040	337600	281820	143610	153400	37168	24450	15074	28694	24915
mgp13154	4626136	Init_R4	Bell 2016	2038907926	9069615	45.681	-73.4375	Warm summer continental or hemiboreal	Dfb	5.9	971	171	6.1	45	30	26	2598300	9041500	242140	329700	271350	138330	146230	35709	23839	14396	28940	23965
mgp13154	4626322	Init_R6	Bell 2016	2325615329	10295352	45.681	-73.4375	Warm summer continental or hemiboreal	Dfb	5.9	971	171	6.1	45	30	26	2721900	9653800	251630	341310	276040	137870	149330	41467	25242	15025	30628	24842
mgp13154	4626323	Init_R8	Bell 2016	2086123634	9320516	45.681	-73.4375	Warm summer continental or hemiboreal	Dfb	5.9	971	171	6.1	45	30	26	2329200	8045800	212300	281160	236470	116220	127330	36251	22253	13311	25946	21647
mgp13154	4626137	Reg_R10	Bell 2016	2318619150	10756113	45.681	-73.4375	Warm summer continental or hemiboreal	Dfb	5.9	971	171	6.1	45	30	26	3016800	11243000	295070	421880	286310	156060	142470	42578	28058	14643	34576	29137
mgp13154	4626324	Reg_R3	Bell 2016	3290051684	14486708	45.681	-73.4375	Warm summer continental or hemiboreal	Dfb	5.9	971	171	6.1	45	30	26	4327000	16011000	412440	588630	397080	220660	187800	64045	38266	19118	49521	41982
mgp13154	4625856	Reg_R4	Bell 2016	1876251010	8034402	45.681	-73.4375	Warm summer continental or hemiboreal	Dfb	5.9	971	171	6.1	45	30	26	2396200	8814400	232170	321590	214490	124380	97259	35928	20838	9493	27394	23423
mgp13154	4626325	Reg_R6	Bell 2016	2075596630	9002467	45.681	-73.4375	Warm summer continental or hemiboreal	Dfb	5.9	971	171	6.1	45	30	26	2704400	10004000	263390	363410	240030	139420	107300	41034	23238	10451	30633	25605
mgp13154	4626328	Reg_R8	Bell 2016	2072665418	9015838	45.681	-73.4375	Warm summer continental or hemiboreal	Dfb	5.9	971	171	6.1	45	30	26	2698200	10009000	260970	366390	248500	138970	116380	40333	24336	11385	31185	25665
mgp13154	4626138	Var_R2	Bell 2016	1702467699	7230891	45.681	-73.4375	Warm summer continental or hemiboreal	Dfb	5.9	971	171	6.1	45	30	26	1880000	5047700	153230	202880	196560	83967	120330	22162	20799	10464	17586	9335
mgp13154	4626139	Var_R3	Bell 2016	1763351463	7505498	45.681	-73.4375	Warm summer continental or hemiboreal	Dfb	5.9	971	171	6.1	45	30	26	1634700	4418500	139250	185160	177300	74238	112130	19819	18401	9933	15754	8286
mgp13154	4626140	Var_R4	Bell 2016	2523424544	11363851	45.681	-73.4375	Warm summer continental or hemiboreal	Dfb	5.9	971	171	6.1	45	30	26	2800700	7739000	247020	328520	314770	133130	193910	35068	32822	16584	27061	14488
mgp2205	4502924	No10-pair.fastq	Chang 2017	9486724800	94867248	39.5853	-89.7607	Hot summer continental	Dfa	11.6	938	42	6	16	62	21	1950200	3448800	188460	294520	192330	72921	293890	39220	25229	7448	16626	2892
mgp2205	4502925	No12-pair.fastq	Chang 2017	8934148200	89341482	40.2197	-88.4674	Hot summer continental	Dfa	10.7	949	42	6	16	62	21	1795500	3193100	180480	277080	176150	67178	266700	32561	22064	7890	15024	2787
mgp2205	4502926	No13-pair.fastq	Chang 2017	9757607000	97576070	40.2213	-88.4665	Hot summer continental	Dfa	10.7	949	42	6	16	62	21	2099400	3658400	209550	323330	204880	80443	313180	40746	27276	8889	17993	3326
mgp2205	4502927	No14-pair.fastq	Chang 2017	11110850800	111108508	40.0777	-88.2179	Hot summer continental	Dfa	10.9	970	42	6	16	62	21	2269600	3894900	214040	353770	219960	79358	354600	47545	28918	11718	22377	3431
mgp2205	4502928	No15-pair.fastq	Chang 2017	8122153300	81221533	40.0777	-88.2157	Hot summer continental	Dfa	10.9	970	42	6	16	62	21	1332300	2419000	135670	198110	133200	51084	196970	26056	17506	4788	12453	2423
mgp2205	4502923	No1-pair.fastq	Chang 2017	6208794000	62087940	38.198	-89.6276	Humid subtropical	Cfa	12.9	1027	42	6	16	62	21	1353000	2489100	133990	200450	137230	50847	196780	26052	16195	6308	11589	2682
mgp2205	4502929	No2-pair.fastq	Chang 2017	9012045900	90120459	38.1986	-89.6272	Humid subtropical	Cfa	12.9	1027	42	6	16	62	21	1716400	3137800	172160	254210	172090	64777	245170	30064	20119	9764	13802	3232
mgp2205	4502930	No3-pair.fastq	Chang 2017	12440446700	124404467	39.3768	-90.3235	Humid subtropical	Cfa	11.6	935	42	6	16	62	21	2881500	5067000	286800	440850	282060	105020	423780	57556	37589	13733	24980	5231
mgp2205	4502931	No4-pair.fastq	Chang 2017	9384932000	93849320	39.3757	-90.3237	Humid subtropical	Cfa	11.6	935	42	6	16	62	21	2025200	3608000	200170	306320	203500	75241	300730	36896	25077	7792	16220	3102
mgp2205	4502932	No5-pair.fastq	Chang 2017	10633324800	106333248	39.3785	-90.3239	Humid subtropical	Cfa	11.6	935	42	6	16	62	21	2320200	4001100	223500	359520	225970	84199	353330	47921	28591	11987	18058	3123
mgp2205	4502933	No6-pair.fastq	Chang 2017	6744249700	67442497	39.3788	-90.3226	Humid subtropical	Cfa	11.6	935	42	6	16	62	21	1363200	2585100	132440	201550	138420	51240	193320	22258	16136	6479	10886	2292
mgp2205	4502934	No8-pair.fastq	Chang 2017	6394801600	63948016	39.5976	-89.7643	Hot summer continental	Dfa	11.6	938	42	6	16	62	21	1006900	1875100	99372	147630	98853	38585	148310	18059	13083	4003	8421	1670
mgp2205	4502935	No9-pair.fastq	Chang 2017	10060714700	100607147	39.5997	-89.7609	Hot summer continental	Dfa	11.6	938	42	6	16	62	21	2352800	4150700	227140	361330	238890	90005	336400	41350	28285	10912	19299	3473
mgp18857	4707563	DC0	Choi 2017	572161561	3204375	37.4599	126.952	Subtropical-Dry Winter	Cwa	11.4	1327	91	5.5	42	37	21	478150	1268200	38773	57449	52850	18736	40371	6401	5581	2875	4448	2662
mgp18857	4707570	DC1_1	Choi 2017	575197473	3114726	37.4599	126.952	Subtropical-Dry Winter	Cwa	11.4	1327	91	5.5	42	37	21	498620	1374300	39006	60458	56278	19690	42261	4899	4967	2814	4214	5129
mgp18857	4707583	DC1_2	Choi 2017	554356262	3093279	37.4599	126.952	Subtropical-Dry Winter	Cwa	11.4	1327	91	5.5	42	37	21	470870	1315200	38076	59827	53705	19160	38856	4486	4577	2495	3711	4405
mgp18857	4707561	DC1_3	Choi 2017	545495218	3018065	37.4599	126.952	Subtropical-Dry Winter	Cwa	11.4	1327	91	5.5	42	37	21	440520	1223600	35872	56629	50448	18309	35885	3783	4048	2448	3241	4017
mgp18857	4707558	DC1_4	Choi 2017	829525514	4549698	37.4599	126.952	Subtropical-Dry Winter	Cwa	11.4	1327	91	5.5	42	37	21	998980	2638900	88334	112390	110230	49039	67626	12784	10923	5560	8650	8452
mgp18857	4707571	DC1_5	Choi 2017	766439886	4209214	37.4599	126.952	Subtropical-Dry Winter	Cwa	11.4	1327	91	5.5	42	37	21	896560	2357800	79465	100980	99152	43696	60893	11452	9553	4942	7924	7643
mgp18857	4707568	DC12_1	Choi 2017	676225075	3762861	37.4599	126.952	Subtropical-Dry Winter	Cwa	11.4	1327	91	5.5	42	37	21	547920	1510200	42296	64715	62166	21965	46440	5959	5784	2935	4532	3765
mgp18857	4707585	DC12_2	Choi 2017	643579358	3497651	37.4599	126.952	Subtropical-Dry Winter	Cwa	11.4	1327	91	5.5	42	37	21	558630	1502400	43530	65584	63408	22296	48044	6328	6520	2992	4528	3604
mgp18857	4707580	DC12_3	Choi 2017	650301895	3553533	37.4599	126.952	Subtropical-Dry Winter	Cwa	11.4	1327	91	5.5	42	37	21	453320	1267000	36142	56526	52277	19069	37608	4321	4554	2341	3235	3140
mgp18857	4707586	DC12_4	Choi 2017	715574780	3915994	37.4599	126.952	Subtropical-Dry Winter	Cwa	11.4	1327	91	5.5	42	37	21	736730	1931200	65147	83278	83257	35138	54175	9004	8187	3802	6126	4120
mgp18857	4707562	DC12_5	Choi 2017	729354993	4063798	37.4599	126.952	Subtropical-Dry Winter	Cwa	11.4	1327	91	5.5	42	37	21	796720	2059000	71174	91226	89724	39292	58031	10368	8536	3601	6450	4416
mgp18857	4707566	DC2_1	Choi 2017	601812503	3274033	37.4599	126.952	Subtropical-Dry Winter	Cwa	11.4	1327	91	5.5	42	37	21	469250	1402700	38707	62026	52966	19914	38825	3774	4408	2473	3392	4107
mgp18857	4707564	DC2_2	Choi 2017	570773518	3155286	37.4599	126.952	Subtropical-Dry Winter	Cwa	11.4	1327	91	5.5	42	37	21	515370	1416900	40299	64206	58344	20341	44166	5110	5259	2640	4208	4402
mgp18857	4707582	DC2_3	Choi 2017	552567024	3026986	37.4599	126.952	Subtropical-Dry Winter	Cwa	11.4	1327	91	5.5	42	37	21	461260	1316900	36435	57597	51797	18207	39070	4473	4708	2615	3747	4174
mgp18857	4707575	DC2_4	Choi 2017	731378265	4023231	37.4599	126.952	Subtropical-Dry Winter	Cwa	11.4	1327	91	5.5	42	37	21	836480	2223300	73607	94841	92768	41072	58380	10492	9126	4549	7151	6332
mgp18857	4707573	DC2_5	Choi 2017	756048896	4139652	37.4599	126.952	Subtropical-Dry Winter	Cwa	11.4	1327	91	5.5	42	37	21	886380	2395300	78049	100660	98223	43804	60729	11493	9508	4427	7491	6604
mgp18857	4707567	DC24_1	Choi 2017	566112460	3108174	37.4599	126.952	Subtropical-Dry Winter	Cwa	11.4	1327	91	5.5	42	37	21	378760	1064600	29820	45965	43097	15544	32580	3708	3971	1968	2976	2434
mgp18857	4707565	DC24_2	Choi 2017	634245205	3399243	37.4599	126.952	Subtropical-Dry Winter	Cwa	11.4	1327	91	5.5	42	37	21	401830	1153200	34267	52100	47382	17655	33970	2730	3982	1958	2639	2972
mgp18857	4707576	DC24_3	Choi 2017	580058103	3246637	37.4599	126.952	Subtropical-Dry Winter	Cwa	11.4	1327	91	5.5	42	37	21	356140	997370	28237	43701	41468	14775	31610	3130	3714	1803	2548	2307
mgp18857	4707579	DC24_4	Choi 2017	691211973	3862301	37.4599	126.952	Subtropical-Dry Winter	Cwa	11.4	1327	91	5.5	42	37	21	687780	1767600	61597	79200	77399	33190	52467	8760	7749	3117	5479	3312
mgp18857	4707560	DC24_5	Choi 2017	696990832	3868293	37.4599	126.952	Subtropical-Dry Winter	Cwa	11.4	1327	91	5.5	42	37	21	679650	1774000	60843	79422	76545	32494	51710	8575	7524	3274	5489	3353
mgp18857	4707581	DC4_1	Choi 2017	652609696	3637570	37.4599	126.952	Subtropical-Dry Winter	Cwa	11.4	1327	91	5.5	42	37	21	684420	1780400	56461	78277	75672	28929	56150	8197	8011	3806	6093	4503
mgp18857	4707574	DC4_2	Choi 2017	538489571	2992906	37.4599	126.952	Subtropical-Dry Winter	Cwa	11.4	1327	91	5.5	42	37	21	510390	1350300	40511	58927	57156	20847	42321	5884	5610	2883	4403	3985
mgp18857	4707589	DC4_3	Choi 2017	691109486	3855896	37.4599	126.952	Subtropical-Dry Winter	Cwa	11.4	1327	91	5.5	42	37	21	659690	1741900	52922	74606	74101	26757	53863	7746	7328	3843	5544	5519
mgp18857	4707569	DC4_4	Choi 2017	747307771	4102235	37.4599	126.952	Subtropical-Dry Winter	Cwa	11.4	1327	91	5.5	42	37	21	770120	2002600	67233	85543	85317	36188	55652	9031	8484	4209	6439	5183
mgp18857	4707559	DC4_5	Choi 2017	750823635	4150610	37.4599	126.952	Subtropical-Dry Winter	Cwa	11.4	1327	91	5.5	42	37	21	798380	2077500	69596	89871	88204	38113	57644	9666	8610	3946	6793	4985
mgp18857	4707584	DC8_1	Choi 2017	582908908	3257066	37.4599	126.952	Subtropical-Dry Winter	Cwa	11.4	1327	91	5.5	42	37	21	488020	1313400	38019	56025	55084	19492	42032	5703	5257	2724	3950	3271
mgp18857	4707577	DC8_2	Choi 2017	609806249	3412911	37.4599	126.952	Subtropical-Dry Winter	Cwa	11.4	1327	91	5.5	42	37	21	467470	1280400	36765	56634	53172	18383	40396	4873	4967	2543	3678	3032
mgp18857	4707572	DC8_3	Choi 2017	652423120	3660170	37.4599	126.952	Subtropical-Dry Winter	Cwa	11.4	1327	91	5.5	42	37	21	499910	1374300	39534	62110	56067	19886	42336	4824	5155	2558	3624	3509
mgp18857	4707588	DC8_4	Choi 2017	813704850	4455554	37.4599	126.952	Subtropical-Dry Winter	Cwa	11.4	1327	91	5.5	42	37	21	848770	2250700	74569	97603	94678	41145	59988	10508	9040	3980	6776	4905
mgp18857	4707587	DC8_5	Choi 2017	801754876	4427211	37.4599	126.952	Subtropical-Dry Winter	Cwa	11.4	1327	91	5.5	42	37	21	811540	2131600	71279	93620	90393	39119	58758	10255	8886	4086	6614	4530
mgp18393	4702982	NC1	Choi 2017	251762454	1416604	37.4599	126.952	Subtropical-Dry Winter	Cwa	11.4	1327	91	5.5	42	37	21	223310	559100	19965	27481	24940	9998	18336	3089	2621	1080	1872	1083
mgp18393	4702995	NC2	Choi 2017	295991344	1644333	37.4599	126.952	Subtropical-Dry Winter	Cwa	11.4	1327	91	5.5	42	37	21	270840	684530	24148	32898	30448	12500	21377	3477	3091	1323	2289	1279
mgp18393	4702971	NC3	Choi 2017	263241389	1457569	37.4599	126.952	Subtropical-Dry Winter	Cwa	11.4	1327	91	5.5	42	37	21	219890	559120	19038	26462	24720	9701	17914	2996	2590	1196	1878	1057
mgp18393	4702989	NC4	Choi 2017	268132713	1481176	37.4599	126.952	Subtropical-Dry Winter	Cwa	11.4	1327	91	5.5	42	37	21	242380	616990	21910	29102	27262	11212	19044	3176	2656	1207	2027	1182
mgp18393	4702980	NC5	Choi 2017	334106633	1848889	37.4599	126.952	Subtropical-Dry Winter	Cwa	11.4	1327	91	5.5	42	37	21	294700	739850	26485	36285	32857	13496	23999	3941	3362	1380	2450	1398
mgp18857	4707578	OR	Choi 2017	627969701	3473797	37.4599	126.952	Subtropical-Dry Winter	Cwa	11.4	1327	91	5.5	42	37	21	553110	1442900	46064	66932	61427	22883	45497	7499	6729	3081	5082	3054
mgp18393	4702967	T1_1	Choi 2017	570977883	3130138	37.4599	126.952	Subtropical-Dry Winter	Cwa	11.4	1327	91	5.5	42	37	21	710550	1769000	61572	73261	81640	32549	55358	6941	8926	4076	5566	6868
mgp18393	4702972	T1_2	Choi 2017	759134203	4209432	37.4599	126.952	Subtropical-Dry Winter	Cwa	11.4	1327	91	5.5	42	37	21	904920	2197500	78213	91446	105110	41781	69761	12111	10745	4811	7239	8035
mgp18393	4702984	T1_3	Choi 2017	1522527691	8297494	37.4599	126.952	Subtropical-Dry Winter	Cwa	11.4	1327	91	5.5	42	37	21	1769100	4387800	152260	191140	202650	79734	136840	18341	20470	9557	13774	18679
mgp18393	4702981	T1_4	Choi 2017	2095879179	11428311	37.4599	126.952	Subtropical-Dry Winter	Cwa	11.4	1327	91	5.5	42	37	21	2419400	6007700	208170	257360	278710	110650	183480	30053	28202	13682	20002	20800
mgp18393	4702994	T1_5	Choi 2017	838829333	4584694	37.4599	126.952	Subtropical-Dry Winter	Cwa	11.4	1327	91	5.5	42	37	21	994610	2490100	85535	103290	113020	46435	75306	10506	11639	5267	7770	8393
mgp18393	4702973	T12_1	Choi 2017	514420404	2823441	37.4599	126.952	Subtropical-Dry Winter	Cwa	11.4	1327	91	5.5	42	37	21	509470	1301200	44156	57683	58581	23826	39156	6402	5692	2462	4182	2514
mgp18393	4702993	T12_2	Choi 2017	595898657	3301223	37.4599	126.952	Subtropical-Dry Winter	Cwa	11.4	1327	91	5.5	42	37	21	622750	1570000	53503	69188	71917	29728	48172	7389	6825	2997	5167	3283
mgp18393	4702990	T12_3	Choi 2017	401251633	2208832	37.4599	126.952	Subtropical-Dry Winter	Cwa	11.4	1327	91	5.5	42	37	21	416030	1046600	36423	46667	47651	19912	32299	5032	4453	1897	3225	2106
mgp18393	4702979	T12_4	Choi 2017	372902610	2056981	37.4599	126.952	Subtropical-Dry Winter	Cwa	11.4	1327	91	5.5	42	37	21	384250	959140	33076	41376	44596	18675	29993	5087	4388	1995	3416	2290
mgp18393	4702969	T12_5	Choi 2017	286633404	1631831	37.4599	126.952	Subtropical-Dry Winter	Cwa	11.4	1327	91	5.5	42	37	21	282610	709820	24279	31121	32447	13200	22661	3469	3087	1353	2345	1329
mgp18393	4702974	T2_1	Choi 2017	1382755860	7623170	37.4599	126.952	Subtropical-Dry Winter	Cwa	11.4	1327	91	5.5	42	37	21	1330700	3353000	115000	145690	152550	60945	101960	15236	16020	7395	10598	9811
mgp18393	4702991	T2_2	Choi 2017	726420143	3941838	37.4599	126.952	Subtropical-Dry Winter	Cwa	11.4	1327	91	5.5	42	37	21	758350	1915100	66924	83569	85171	34855	56408	9006	8369	4313	6476	6625
mgp18393	4702976	T2_3	Choi 2017	681454104	3767325	37.4599	126.952	Subtropical-Dry Winter	Cwa	11.4	1327	91	5.5	42	37	21	663920	1682900	59191	72868	75310	31142	50898	7913	7408	3803	5663	5431
mgp18393	4702992	T2_4	Choi 2017	524935120	2872536	37.4599	126.952	Subtropical-Dry Winter	Cwa	11.4	1327	91	5.5	42	37	21	562630	1420600	48916	60546	64229	26051	42348	6702	6308	3295	4697	4521
mgp18393	4702983	T2_5	Choi 2017	379698417	2069903	37.4599	126.952	Subtropical-Dry Winter	Cwa	11.4	1327	91	5.5	42	37	21	391740	982930	33427	42285	44258	18057	29912	4830	4470	2088	3289	2935
mgp18393	4702988	T4_1	Choi 2017	458323520	2513034	37.4599	126.952	Subtropical-Dry Winter	Cwa	11.4	1327	91	5.5	42	37	21	439930	1120100	37937	48359	49988	20320	34257	5275	5063	2277	3522	2657
mgp18393	4702987	T4_2	Choi 2017	393816984	2158172	37.4599	126.952	Subtropical-Dry Winter	Cwa	11.4	1327	91	5.5	42	37	21	395140	1000100	33713	42903	44780	18447	31394	4222	4534	2041	3138	2403
mgp18393	4702985	T4_3	Choi 2017	425897545	2339629	37.4599	126.952	Subtropical-Dry Winter	Cwa	11.4	1327	91	5.5	42	37	21	407320	1027000	35664	44408	46303	18834	31648	4626	4618	2252	3391	2717
mgp18393	4702966	T4_4	Choi 2017	584082373	3224188	37.4599	126.952	Subtropical-Dry Winter	Cwa	11.4	1327	91	5.5	42	37	21	583970	1469700	51204	65523	65775	27759	44457	7184	6475	2684	4628	3437
mgp18393	4702978	T4_5	Choi 2017	516699190	2860404	37.4599	126.952	Subtropical-Dry Winter	Cwa	11.4	1327	91	5.5	42	37	21	505600	1291000	44188	56047	57527	23768	38378	5819	5766	2362	3944	3085
mgp18393	4702986	T8_1	Choi 2017	370497677	2039288	37.4599	126.952	Subtropical-Dry Winter	Cwa	11.4	1327	91	5.5	42	37	21	372450	937970	32389	39713	43148	17764	28735	4778	4208	1885	3309	2289
mgp18393	4702977	T8_2	Choi 2017	845842384	4697108	37.4599	126.952	Subtropical-Dry Winter	Cwa	11.4	1327	91	5.5	42	37	21	794950	2061300	68731	88682	90470	37101	61267	9194	8987	4010	6375	4463
mgp18393	4702968	T8_3	Choi 2017	266506149	1466354	37.4599	126.952	Subtropical-Dry Winter	Cwa	11.4	1327	91	5.5	42	37	21	275930	699320	23496	29440	31680	12911	21423	3413	3172	1422	2314	1720
mgp18393	4702975	T8_4	Choi 2017	344102058	1901086	37.4599	126.952	Subtropical-Dry Winter	Cwa	11.4	1327	91	5.5	42	37	21	314940	800030	26924	34330	35278	14342	24939	3903	3440	1535	2627	1901
mgp18393	4702970	T8_5	Choi 2017	496934737	2748139	37.4599	126.952	Subtropical-Dry Winter	Cwa	11.4	1327	91	5.5	42	37	21	468910	1210100	40740	53284	53073	21993	36761	5824	5372	2317	3662	2481
mgp5588	4541641	CC04_min_Jun13	Cline Ecology 2015	7700742394	50998294	45.4026	-93.2021	Warm summer continental or hemiboreal	Dfb	6.2	750	96	6.1	74	16	9	10506000	28118000	939070	1237000	1162100	515570	741270	118390	121040	69749	99502	48646
mgp5588	4539063	CC10_min_Jun13	Cline Ecology 2015	7942507135	52599385	45.4026	-93.2021	Warm summer continental or hemiboreal	Dfb	6.2	750	96	6.1	74	16	9	10507000	27919000	949090	1253800	1167500	518360	773440	113430	118850	54251	90178	51584
mgp5588	4541642	CC28_min_Jun13	Cline Ecology 2015	8791533476	58222076	45.4026	-93.2021	Warm summer continental or hemiboreal	Dfb	6.2	750	96	6.1	74	16	9	11995000	31778000	1067900	1409600	1326600	589840	868080	126690	135430	77459	105390	54347
mgp5588	4539064	CC35_min_Jun13	Cline Ecology 2015	7818845383	51780433	45.4026	-93.2021	Warm summer continental or hemiboreal	Dfb	6.2	750	96	6.1	74	16	9	8034800	21703000	714280	946310	881730	395310	553930	86724	91294	56821	79345	37230
mgp5588	4541644	CC39_min_Jun13	Cline Ecology 2015	7034330923	46584973	45.4026	-93.2021	Warm summer continental or hemiboreal	Dfb	6.2	750	96	6.1	74	16	9	9703800	25956000	865650	1159000	1070700	482460	690400	103040	107920	61739	85507	42136
mgp5588	4541645	CC41_min_Jun13	Cline Ecology 2015	10745529044	71162444	45.4026	-93.2021	Warm summer continental or hemiboreal	Dfb	6.2	750	96	6.1	74	16	9	14780000	39465000	1330000	1754700	1631300	729740	1045600	161280	168750	91520	135030	70031
mgp5588	4541646	CC53_min_Jun13	Cline Ecology 2015	11702083089	77497239	45.4026	-93.2021	Warm summer continental or hemiboreal	Dfb	6.2	750	96	6.1	74	16	9	15228000	40829000	1365000	1818200	1683000	752030	1086200	161910	173380	91418	135960	70123
mgp5588	4541647	CC72_min_Jun13	Cline Ecology 2015	9453732047	62607497	45.4026	-93.2021	Warm summer continental or hemiboreal	Dfb	6.2	750	96	6.1	74	16	9	12926000	35077000	1156900	1553300	1427500	650430	896650	138580	144160	87760	117640	58463
mgp5588	4541648	CC77_min_Jun13	Cline Ecology 2015	7567538499	50116149	45.4026	-93.2021	Warm summer continental or hemiboreal	Dfb	6.2	750	96	6.1	74	16	9	10033000	27152000	897950	1198700	1107200	487820	698910	111180	115780	68576	101430	48625
mgp5588	4541649	CCNH_min_Jun13	Cline Ecology 2015	8876832923	58786973	45.4026	-93.2021	Warm summer continental or hemiboreal	Dfb	6.2	750	96	6.1	74	16	9	11788000	31888000	1036100	1385000	1287300	559190	805070	123380	135450	89865	121430	54139
mgp5588	4541650	CCOS_min_Jun13	Cline Ecology 2015	7450633091	49341941	45.4026	-93.2021	Warm summer continental or hemiboreal	Dfb	6.2	750	96	6.1	74	16	9	10157000	27382000	903390	1195500	1112100	490120	702630	109710	116930	71105	99935	55543
mgp5588	4541651	CCUPO_min_Jun13	Cline Ecology 2015	8731088931	57821781	45.4026	-93.2021	Warm summer continental or hemiboreal	Dfb	6.2	750	96	6.1	74	16	9	11509000	32002000	990880	1374400	1238800	555710	749110	113850	130130	85474	116830	55454
mgp15600	4670123	GV_uncut	Cline 2017	6942986342	45980042	43.5694	-110.311	Subarctic or boreal	Dfc	-0.3	521	44	7.2	38	40	22	7586700	19896000	682550	987460	828460	378330	551050	79317	82017	29572	61936	34164
mgp15600	4670120	GVE_uncut	Cline 2017	7003222356	46378956	43.5694	-110.311	Subarctic or boreal	Dfc	-0.3	521	44	7.2	38	40	22	8708900	22918000	776550	1097300	953210	435010	626300	89715	94891	33913	72023	40374
mgp15600	4670121	LH_uncut	Cline 2017	6296889656	41701256	43.2958	-110.657	Subarctic or boreal	Dfc	0.6	509	44	7.2	38	40	22	6055700	15680000	549140	771230	664810	305650	451430	59525	66723	21905	49165	26367
mgp15600	4670118	LHE_uncut	Cline 2017	6105280471	40432321	43.2958	-110.657	Subarctic or boreal	Dfc	0.6	509	44	7.2	38	40	22	6154600	16140000	564880	753770	686740	304710	474630	65180	69494	24000	51933	30742
mgp15600	4670119	MB_uncut	Cline 2017	4774945103	31622153	43.5144	-110.712	Subarctic or boreal	Dfc	2.5	493	44	7.2	38	40	22	5306000	13953000	482380	644550	599260	253390	422500	57231	62342	23134	47072	26208
mgp15600	4670117	MBE_uncut	Cline 2017	4668384403	30916453	43.5144	-110.712	Subarctic or boreal	Dfc	2.5	493	44	7.2	38	40	22	5200400	13762000	467520	620080	585960	248260	417850	53987	61522	19497	43010	25400
mgp15600	4670122	UH_uncut	Cline 2017	7678885748	50853548	48.3	-110.661	Semi-arid cold desert	BSk	6.4	312	24	7.7	22	42	36	8303500	21332000	757870	1060700	921010	413330	631040	82143	95321	29732	66850	35450
mgp15600	4670116	UHE_uncut	Cline 2017	6155685630	40766130	48.3	-110.661	Semi-arid cold desert	BSk	6.4	312	24	7.7	22	42	36	6955600	18315000	635300	873240	778270	343840	523870	73087	80696	26727	56869	35007
mgp3608	4465558	BOF_454	Cobo-Díaz 2015	80126156	257697	36.9574	-3.46336	Mediterranean hot summer	Csa	12.8	570	33	7	41	38	22	62395	178720	5345	7737	7059	3033	5311	477	642	328	414	561
mgp3608	4465556	UOF_454	Cobo-Díaz 2015	159918596	412302	36.9697	-3.46027	Mediterranean hot summer	Csa	12.8	570	33	7	41	38	22	93905	277630	7824	11203	10853	4358	7612	751	1016	585	734	859
mgp405	4453246	METASOIL F1 Rothamsted 2009 February 0-21cm Direct MPBIO1O1	Delmont 2012	358393415	976268	51.4815	0.222231	Oceanic	Cfb	10.2	632	74	6.6	34	38	28	238450	724530	19493	29670	26348	11494	16564	2263	2798	1801	2407	1002
mgp405	4453247	METASOIL F2a Rothamsted 2009 February 0-21cm Indirect MPBIO1O1	Delmont 2012	470523038	1094883	51.4815	0.222231	Oceanic	Cfb	10.2	632	74	6.6	34	38	28	331620	975350	28320	38025	37083	16382	22976	3277	3947	2717	3346	1812
mgp405	4453254	METASOIL F2b Rothamsted 2009 February 0-21cm Indirect MPBIO1O1	Delmont 2012	321342919	890966	51.4815	0.222231	Oceanic	Cfb	10.2	632	74	6.6	34	38	28	248420	716440	21611	29617	27580	12197	16971	2410	2990	1956	2477	1199
mgp405	4453407	METASOIL F3 Rothamsted 2009 February 0-10cm Indirect in plug	Delmont 2012	311395302	754829	51.4815	0.222231	Oceanic	Cfb	10.2	632	74	6.6	34	38	28	212050	627090	18607	26067	24068	10237	15182	2017	2436	1647	2171	920
mgp405	4453257	METASOIL F4 Rothamsted 2009 February 0-10cm Indirect DNA Tissue	Delmont 2012	391415961	946839	51.4815	0.222231	Oceanic	Cfb	10.2	632	74	6.6	34	38	28	221420	740060	18375	26741	24298	10628	16118	2230	2606	1563	2107	1217
mgp405	4453274	METASOIL F5 Rothamsted 2009 February 0-10cm Indirect Gram positive	Delmont 2012	256246231	754185	51.4815	0.222231	Oceanic	Cfb	10.2	632	74	6.6	34	38	28	636510	1874200	51932	78927	75130	33447	62612	7132	9952	5170	6220	1971
mgp405	4453433	METASOIL F6 Rothamsted 2009 February 11-21cm Indirect in plug	Delmont 2012	308792456	826513	51.4815	0.222231	Oceanic	Cfb	10.2	632	74	6.6	34	38	28	208520	605150	18445	25644	23772	10269	15322	2082	2505	1517	1990	815
mgp405	4453261	METASOIL J1 Rothamsted 2009 July 0-21cm Direct MPBIO1O1	Delmont 2012	465558160	1130719	51.4815	0.222231	Oceanic	Cfb	10.2	632	74	6.6	34	38	28	307780	943930	25845	36676	35164	15305	21696	3118	3632	2378	2994	1230
mgp405	4453434	METASOIL J1a-10 Rothamsted 2010 July 0-21cm Direct MPBIO1O1	Delmont 2012	433202892	1137813	51.4815	0.222231	Oceanic	Cfb	10.2	632	74	6.6	34	38	28	303150	915970	24607	37235	34102	14535	21975	3195	3636	2394	2899	1233
mgp405	4453436	METASOIL J1b-10 Rothamsted 2010 July 0-21cm Direct MPBIO1O1	Delmont 2012	343359668	919406	51.4815	0.222231	Oceanic	Cfb	10.2	632	74	6.6	34	38	28	233840	714910	19115	29152	26429	11212	16469	2597	2790	1892	2236	952
mgp405	4453435	METASOIL J1rhizo-10 Rothamsted Rhizosphere 2010 July 0-21cm Direct MPBIO1O1	Delmont 2012	371406384	1068770	51.4815	0.222231	Oceanic	Cfb	10.2	632	74	6.6	34	38	28	261770	781080	22721	32294	29439	12936	18328	2808	3135	2096	2570	1275
mgp405	4453256	METASOIL J4 Rothamsted 2009 July 0-10cm Indirect DNA Tissue	Delmont 2012	505500140	1135084	51.4815	0.222231	Oceanic	Cfb	10.2	632	74	6.6	34	38	28	289450	958080	23977	34755	31816	13667	21175	2859	3500	2037	2673	1300
mgp405	4453406	METASOIL J7 Rothamsted 2009 July 0-21cm Direct MoBIO	Delmont 2012	338504768	938860	51.4815	0.222231	Oceanic	Cfb	10.2	632	74	6.6	34	38	28	239420	722410	19719	29459	26744	11156	16704	2437	2762	1816	2394	1068
mgp8624	4558897	0A-Metagenome	Dini-Andreote 2014	2176321831	13242159	53.4937	6.22476	Oceanic	Cfb	8.7	801	53	5.7	50	28	22	2832600	6966500	264390	278110	318000	132890	264390	33161	32312	13099	21305	15367
mgp8624	4558900	0B-Metagenome	Dini-Andreote 2014	3401282325	20528012	53.4937	6.22476	Oceanic	Cfb	8.7	801	53	5.7	50	28	22	4347600	10719000	402490	429740	488700	204940	402490	48701	50175	20130	32422	23506
mgp8624	4558903	0C-Metagenome	Dini-Andreote 2014	1938333700	11522239	53.4937	6.22476	Oceanic	Cfb	8.7	801	53	5.7	50	28	22	2333200	5768300	216480	229760	263520	107640	216480	27231	26779	10937	17381	12288
mgp8624	4558906	1D-Metagenome	Dini-Andreote 2014	2255559508	12813819	53.4937	6.22476	Oceanic	Cfb	8.7	801	53	5.7	50	28	22	2974800	7523700	269110	320110	339530	138130	269110	32457	33357	13977	21572	19405
mgp8624	4558909	1F-Metagenome	Dini-Andreote 2014	2777721432	16485482	53.4937	6.22476	Oceanic	Cfb	8.7	801	53	5.7	50	28	22	4066300	10261000	367490	444040	467240	191960	367490	41901	44220	19603	28843	27576
mgp8624	4558912	1G-Metagenome	Dini-Andreote 2014	2826920802	18046584	53.4937	6.22476	Oceanic	Cfb	8.7	801	53	5.7	50	28	22	4346700	11107000	394710	501480	495920	201340	394710	42678	47794	20963	32389	27692
mgp8624	4558915	3A-Metagenome	Dini-Andreote 2014	3205571588	19548727	53.4937	6.22476	Oceanic	Cfb	8.7	801	53	5.7	50	28	22	3750900	9332300	340790	402000	422750	174510	340790	48847	44558	16819	30182	20836
mgp8624	4558918	3B-Metagenome	Dini-Andreote 2014	1847792318	11148206	53.4937	6.22476	Oceanic	Cfb	8.7	801	53	5.7	50	28	22	2193500	5461900	198350	232610	247470	102230	198350	28536	25879	10183	17944	12238
mgp8624	4558921	3C-Metagenome	Dini-Andreote 2014	2418443284	14798632	53.4937	6.22476	Oceanic	Cfb	8.7	801	53	5.7	50	28	22	2772500	6845000	251730	294500	311400	129800	251730	36991	33140	12298	22555	15047
mgp8624	4558924	6A-Metagenome	Dini-Andreote 2014	2107365646	12835938	53.4937	6.22476	Oceanic	Cfb	8.7	801	53	5.7	50	28	22	2686200	6714800	237940	294590	306080	121450	237940	34759	31080	12660	21466	14743
mgp8624	4558927	6C-Metagenome	Dini-Andreote 2014	2072319370	11648006	53.4937	6.22476	Oceanic	Cfb	8.7	801	53	5.7	50	28	22	2537800	6437600	227520	286210	289140	114270	227520	29904	28614	12631	20832	15208
mgp8624	4558930	6D-Metagenome	Dini-Andreote 2014	1273965121	7103663	53.4937	6.22476	Oceanic	Cfb	8.7	801	53	5.7	50	28	22	1512800	3839800	134470	170550	172720	67440	134470	17619	17096	8140	12082	9442
mgp8624	4558933	8A-Metagenome	Dini-Andreote 2014	437994379	2379208	53.4937	6.22476	Oceanic	Cfb	8.7	801	53	5.7	50	28	22	533140	1366100	48872	60041	61160	24370	48872	5795	5940	2643	4083	3529
mgp8624	4558936	8B-Metagenome	Dini-Andreote 2014	573508052	3150283	53.4937	6.22476	Oceanic	Cfb	8.7	801	53	5.7	50	28	22	701430	1784400	64421	79415	80249	32117	64421	8070	7829	3325	5497	4519
mgp8624	4558939	8C-Metagenome	Dini-Andreote 2014	2993511909	18105028	53.4937	6.22476	Oceanic	Cfb	8.7	801	53	5.7	50	28	22	3987300	10049000	361970	448820	454770	179890	361970	46466	45397	19513	30514	24674
mgp4745	4449252	1_17_RL2	Fierer 2012	36665161	92615	45.3993	-93.2653	Warm summer continental or hemiboreal	Dfb	6.2	750	96	6.1	74	16	9	24094	65340	2074	2872	2814	1200	1900	236	275	122	195	136
mgp4745	4449255	1_22_RL3	Fierer 2012	32258894	80499	45.3993	-93.2653	Warm summer continental or hemiboreal	Dfb	6.2	750	96	6.1	74	16	9	17795	51398	1628	2149	2080	906	1439	184	244	151	150	99
mgp4745	4449256	1_23_RL4	Fierer 2012	35553938	87810	45.3993	-93.2653	Warm summer continental or hemiboreal	Dfb	6.2	750	96	6.1	74	16	9	20326	58373	1836	2477	2188	1043	1595	244	263	121	162	139
mgp4745	4449258	1_38_RL5	Fierer 2012	26412606	66029	45.3993	-93.2653	Warm summer continental or hemiboreal	Dfb	6.2	750	96	6.1	74	16	9	12374	35931	1094	1477	1406	614	1063	118	173	88	110	93
mgp4745	4449357	1_45_RL7	Fierer 2012	25790999	64560	45.3993	-93.2653	Warm summer continental or hemiboreal	Dfb	6.2	750	96	6.1	74	16	9	69732	182990	6728	9469	8267	3498	7203	753	817	293	713	497
mgp4745	4449284	1_52_RL8	Fierer 2012	30913425	77306	45.3993	-93.2653	Warm summer continental or hemiboreal	Dfb	6.2	750	96	6.1	74	16	9	109710	260810	9583	13169	14284	5882	11768	1086	1725	684	757	587
mgp4745	4449877	1_54_RL9	Fierer 2012	34126987	84858	45.3993	-93.2653	Warm summer continental or hemiboreal	Dfb	6.2	750	96	6.1	74	16	9	18678	54284	1655	2251	2124	896	1567	212	237	107	158	119
mgp4745	4449249	1_8_RL1	Fierer 2012	23664198	59998	45.3993	-93.2653	Warm summer continental or hemiboreal	Dfb	6.2	750	96	6.1	74	16	9	11175	31971	1113	1381	1188	539	878	125	149	88	101	60
mgp4745	4449356	2_201_RL1	Fierer 2012	16491779	49322	42.4416	-85.3761	Hot summer continental	Dfa	8.7	912	105	6.1	51	32	17	50852	122820	5236	6023	5976	2424	4602	638	613	258	462	335
mgp4745	4449358	2_204_RL2	Fierer 2012	30994869	90765	42.4416	-85.3761	Hot summer continental	Dfa	8.7	912	105	6.1	51	32	17	93217	225840	9081	11098	12099	4747	9623	1013	1078	530	658	615
mgp4745	4449359	2_209_RL3	Fierer 2012	21339728	62232	42.4416	-85.3761	Hot summer continental	Dfa	8.7	912	105	6.1	51	32	17	68472	167370	7448	8465	8525	3489	7298	808	725	603	565	336
mgp4745	4449360	2_301_RL4	Fierer 2012	29380616	84770	42.4416	-85.3761	Hot summer continental	Dfa	8.7	912	105	6.1	51	32	17	87997	215360	8947	10342	11735	4384	10097	865	1168	730	728	447
mgp4745	4449362	2_309_RL6	Fierer 2012	30469304	88074	42.4416	-85.3761	Hot summer continental	Dfa	8.7	912	105	6.1	51	32	17	101810	248250	9026	12187	12667	5817	9734	1235	1391	568	838	520
mgp4745	4449363	2_401_RL7	Fierer 2012	23810360	69516	42.4416	-85.3761	Hot summer continental	Dfa	8.7	912	105	6.1	51	32	17	14076	39089	1280	1663	1536	655	1171	174	190	68	138	68
mgp4745	4449364	2_404_RL8	Fierer 2012	22988021	65582	42.4416	-85.3761	Hot summer continental	Dfa	8.7	912	105	6.1	51	32	17	14091	38422	1232	1581	1660	670	1203	147	184	69	145	75
mgp4745	4449365	2_409_RL9	Fierer 2012	13736747	39365	42.4416	-85.3761	Hot summer continental	Dfa	8.7	912	105	6.1	51	32	17	8706	23991	768	1026	1024	422	722	108	127	61	76	40
mgp2997	4477875	AR3_r1	Fierer 2012	523535200	5235352	-26.733	-54.683	Humid subtropical	Cfa	20.1	1582	13	5.3	44	24	32	228120	460140	22263	31187	24996	9002	29086	3587	3112	1694	2448	711
mgp2997	4477876	BZ1_r1	Fierer 2012	654390300	6543903	64.8	-148.25	Subarctic or boreal	Dfc	-3.4	302	236	5.4	26	67	7	349710	719660	33299	46438	37263	14616	40898	4334	4475	2467	3604	769
mgp2997	4477877	CL1_r1	Fierer 2012	640294000	6402940	34.617	-81.667	Humid subtropical	Cfa	15.7	1228	41	5	51	33	16	354370	734370	35039	48677	37426	14909	39525	4516	5204	2941	3858	939
mgp2997	4477899	DF1_r1	Fierer 2012	389004400	3890044	35.967	-79.083	Humid subtropical	Cfa	14.7	1161	143	5.4	48	39	13	248140	522420	24334	33785	26373	10819	26901	2889	3486	2271	2874	793
mgp2997	4477900	EB017_r1	Fierer 2012	794708600	7947086	-78.03	163.873	Ice cap	EF	-25	210	0	8.3	96	1	3	320330	610670	27477	43696	33208	11356	47890	2635	4363	517	1552	599
mgp2997	4477901	EB019_r1	Fierer 2012	545464000	5454640	-77.725	162.313	Ice cap	EF	-25	210	0	8.3	96	1	3	400300	739570	35233	51822	46730	19575	57386	3063	3912	749	1438	1187
mgp2997	4477902	EB020_r1	Fierer 2012	944668400	9446684	-77.608	163.249	Ice cap	EF	-25	210	0	8.3	96	1	3	415150	748630	36545	54788	42386	17000	68075	4178	4742	446	2185	985
mgp2997	4477903	EB021_r1	Fierer 2012	654368100	6543681	-77.6375	162.887	Ice cap	EF	-25	210	0	8.3	96	1	3	278490	511150	23804	37512	29934	11781	45377	2905	3354	434	1416	424
mgp2997	4477904	EB024_r1	Fierer 2012	1086364600	10863646	-77.527	161.702	Ice cap	EF	-25	210	0	8.3	96	1	3	503350	884520	44503	68963	50604	20401	84949	5213	6038	813	2655	1318
mgp2997	4477803	EB026_read1	Fierer 2012	595168400	5951684	-77.725	162.311	Ice cap	EF	-25	210	0	8.3	96	1	3	372460	712300	35623	46599	40536	17494	51853	3608	3595	760	2315	783
mgp2997	4477804	KP1_r1	Fierer 2012	534883200	5348832	39.1	-96.6	Humid subtropical	Cfa	12.1	866	47	6.8	17	54	29	292980	593340	28475	42023	32216	12168	35737	3794	4015	1263	2679	819
mgp2997	4477805	MD3_r1	Fierer 2012	589949700	5899497	34.9	-115.65	Arid desert	BWh	17.4	207	0	8	69	22	9	310510	613710	27536	43117	33284	13688	43680	3435	3524	438	2132	573
mgp2997	4477807	PE6_r1	Fierer 2012	920666200	9206662	-12.633	-71.233	Tropical rainforest	Af	24.5	3046	92	5.5	41	28	30	417900	810880	38436	57116	43409	17179	51130	5476	5862	3565	3764	1168
mgp2997	4477872	SF2_r1	Fierer 2012	680545600	6805456	35.383	-105.933	Semi-arid cold desert	BSk	10.4	347	0	8	60	24	16	292850	583480	26661	40540	29983	12569	41574	3288	3625	480	2160	763
mgp2997	4477873	SV1_r1	Fierer 2012	1112254600	11122546	34.333	-106.733	Semi-arid cold desert	BSk	12.6	257	0	8	60	24	16	545560	1031000	49493	74808	56305	22619	80486	5986	6979	705	3994	1116
mgp2997	4477874	TL1_r1	Fierer 2012	601197100	6011971	68.633	-149.583	Subarctic or boreal	Dfc	-11.7	229	285	5.6	31	43	25	351770	703590	34195	47245	37226	14590	40152	5379	4427	2974	3435	658
mgp10591	4579277	bulk soil_1	Fonseca 2018	648451865	2694917	-8.37677	-63.6314	Tropical monsoon	Am	26.2	2192	8	4	39	33	27	203830	525590	17112	22780	22074	9283	15218	1764	2531	1529	1638	753
mgp10591	4579275	bulk soil_2	Fonseca 2018	413336354	1725895	-8.37677	-63.6314	Tropical monsoon	Am	26.2	2192	8	4	39	33	27	128470	330240	10950	14479	13804	5876	9794	1168	1659	837	1019	470
mgp10591	4579276	bulk soil_3	Fonseca 2018	435889590	2116070	-8.37677	-63.6314	Tropical monsoon	Am	26.2	2192	8	4	39	33	27	181580	461180	15862	20460	19465	9061	13789	1652	2187	1317	1424	618
mgp5845	4535167	rhizosphere_1	Fonseca 2018	630081836	2715594	-8.37677	-63.6314	Tropical monsoon	Am	26.2	2192	8	4	39	33	27	450250	1330100	37714	53363	47790	21231	34271	4140	5727	3456	4493	2588
mgp5845	4535136	rhizosphere_2	Fonseca 2018	296443716	1293070	-8.37677	-63.6314	Tropical monsoon	Am	26.2	2192	8	4	39	33	27	204830	598050	17564	23747	22097	9710	15719	1967	2507	1559	2138	1043
mgp5845	4535204	rhizosphere_3	Fonseca 2018	587773541	2610515	-8.37677	-63.6314	Tropical monsoon	Am	26.2	2192	8	4	39	33	27	427820	1227700	37744	49970	46295	20586	32344	4063	5307	3212	4413	2123
mgp13011	4623658	1_TAAGGCGA-TAGATCGC_L001_R1_001	Gibbons 2017	1439771867	14255167	46.682	-114.027	Warm summer continental or hemiboreal	Dfb	5.9	374	43	7.2	32	47	21	1440800	3654500	133260	176660	157790	64613	118670	17500	16742	7222	13425	9018
mgp13011	4623639	100_CGTACTAG-AAGGAGTA_L005_R1_001	Gibbons 2017	1122131210	11110210	46.682	-114.027	Warm summer continental or hemiboreal	Dfb	5.9	374	43	7.2	32	47	21	982220	2456800	89095	126170	107520	44145	86347	11340	11383	3566	8625	4113
mgp13011	4623640	118_CGTACTAG-CTAAGCCT_L001_R1_001	Gibbons 2017	1152978428	11415628	46.682	-114.027	Warm summer continental or hemiboreal	Dfb	5.9	374	43	7.2	32	47	21	1071700	2695600	97654	139860	117470	47697	93399	12339	12262	3895	9235	4205
mgp13011	4623641	127_AGGCAGAA-CTCTCTAT_L003_R1_001	Gibbons 2017	1363452328	13499528	46.682	-114.027	Warm summer continental or hemiboreal	Dfb	5.9	374	43	7.2	32	47	21	1311400	3309600	121250	170250	144810	59869	112560	15512	14531	4832	11158	5536
mgp13011	4623642	131_AGGCAGAA-TAGATCGC_L002_R1_001	Gibbons 2017	1530428356	15152756	46.682	-114.027	Warm summer continental or hemiboreal	Dfb	5.9	374	43	7.2	32	47	21	1356100	3433100	124250	178450	149010	60547	119140	15803	15167	4638	11138	5385
mgp13011	4623643	153_AGGCAGAA-GTAAGGAG_L001_R1_001	Gibbons 2017	266181258	2635458	46.682	-114.027	Warm summer continental or hemiboreal	Dfb	5.9	374	43	7.2	32	47	21	243680	616690	22539	30794	26662	11198	20860	3004	2648	1010	2093	984
mgp13011	4623644	154_AGGCAGAA-TATCCTCT_L004_R1_001	Gibbons 2017	3075166291	30447191	46.682	-114.027	Warm summer continental or hemiboreal	Dfb	5.9	374	43	7.2	32	47	21	2734800	6862400	251460	350140	301060	123770	237410	31945	30210	10097	23135	10595
mgp13011	4623645	155_AGGCAGAA-AGAGTAGA_L005_R1_001	Gibbons 2017	1541232730	15259730	46.682	-114.027	Warm summer continental or hemiboreal	Dfb	5.9	374	43	7.2	32	47	21	1299900	3291000	119160	170810	142710	59175	109970	15296	14718	5532	11875	6124
mgp13011	4623646	157_AGGCAGAA-ACTGCATA_L002_R1_001	Gibbons 2017	2163796730	21423730	46.682	-114.027	Warm summer continental or hemiboreal	Dfb	5.9	374	43	7.2	32	47	21	1951800	4982400	176340	246680	212730	89574	165290	22570	21247	7940	17067	7583
mgp13011	4623647	168_AGGCAGAA-AAGGAGTA_L003_R1_001	Gibbons 2017	1745886404	17286004	46.682	-114.027	Warm summer continental or hemiboreal	Dfb	5.9	374	43	7.2	32	47	21	1653800	4175600	152020	210380	181770	75982	141320	20023	18522	6113	14081	7344
mgp13011	4623650	17_TAAGGCGA-GTAAGGAG_L005_R1_001	Gibbons 2017	2017584484	19976084	46.682	-114.027	Warm summer continental or hemiboreal	Dfb	5.9	374	43	7.2	32	47	21	1746500	4396900	161340	219160	193040	78335	152890	20768	19733	6526	15007	7586
mgp13011	4623648	170_TCCTGAGC-TAGATCGC_L005_R1_001	Gibbons 2017	1280467698	12677898	46.682	-114.027	Warm summer continental or hemiboreal	Dfb	5.9	374	43	7.2	32	47	21	1158300	2910100	105350	147450	126670	51654	101430	13848	13278	5035	10156	5574
mgp13011	4623649	178_AGGCAGAA-CTAAGCCT_L004_R1_001	Gibbons 2017	2920732746	28918146	46.682	-114.027	Warm summer continental or hemiboreal	Dfb	5.9	374	43	7.2	32	47	21	2747800	6924600	253920	355300	301610	125310	235430	32552	31629	10764	23811	12357
mgp13011	4623651	181_TCCTGAGC-CTCTCTAT_L001_R1_001	Gibbons 2017	1761221638	17437838	46.682	-114.027	Warm summer continental or hemiboreal	Dfb	5.9	374	43	7.2	32	47	21	1748200	4424200	161250	225090	192420	78829	149400	20801	19841	7232	15026	8324
mgp13011	4623652	185_TCCTGAGC-AGAGTAGA_L003_R1_001	Gibbons 2017	1352693101	13393001	46.682	-114.027	Warm summer continental or hemiboreal	Dfb	5.9	374	43	7.2	32	47	21	1342500	3411400	124860	172290	147720	61930	113900	15972	15098	5475	11406	6483
mgp13011	4623653	188_TCCTGAGC-GTAAGGAG_L004_R1_001	Gibbons 2017	1030057085	10198585	46.682	-114.027	Warm summer continental or hemiboreal	Dfb	5.9	374	43	7.2	32	47	21	1012100	2545800	93647	129790	111430	46032	86478	12251	11149	3829	8917	4111
mgp13011	4623654	189_TCCTGAGC-ACTGCATA_L005_R1_001	Gibbons 2017	3071320514	30409114	46.682	-114.027	Warm summer continental or hemiboreal	Dfb	5.9	374	43	7.2	32	47	21	2724100	6860000	251250	344810	299540	122450	232440	32122	31285	11707	24697	14426
mgp13011	4623655	191_TCCTGAGC-TATCCTCT_L002_R1_001	Gibbons 2017	2198562041	21767941	46.682	-114.027	Warm summer continental or hemiboreal	Dfb	5.9	374	43	7.2	32	47	21	2087700	5262800	194420	266000	229690	94257	178280	25428	23087	8112	18064	9385
mgp13011	4623656	194_TCCTGAGC-CTAAGCCT_L002_R1_001	Gibbons 2017	920379872	9112672	46.682	-114.027	Warm summer continental or hemiboreal	Dfb	5.9	374	43	7.2	32	47	21	837220	2113200	75860	106330	92022	36899	72263	10000	9682	3666	7518	3456
mgp13011	4623657	198_GGACTCCT-TAGATCGC_L003_R1_001	Gibbons 2017	1703423378	16865578	46.682	-114.027	Warm summer continental or hemiboreal	Dfb	5.9	374	43	7.2	32	47	21	1728000	4368900	160110	217900	189510	77190	146520	20934	19849	7764	15447	9811
mgp13011	4623677	2_TAAGGCGA-CTCTCTAT_L002_R1_001	Gibbons 2017	1698567702	16817502	46.682	-114.027	Warm summer continental or hemiboreal	Dfb	5.9	374	43	7.2	32	47	21	1618300	4080400	149840	208140	179740	73808	140600	19234	18338	6135	14157	6666
mgp13011	4623659	201_GGACTCCT-CTCTCTAT_L004_R1_001	Gibbons 2017	2050575528	20302728	46.682	-114.027	Warm summer continental or hemiboreal	Dfb	5.9	374	43	7.2	32	47	21	1973100	4991800	184410	246220	219150	89305	169550	23997	23050	8002	17569	9833
mgp13011	4623660	203_TCCTGAGC-AAGGAGTA_L001_R1_001	Gibbons 2017	1082151269	10714369	46.682	-114.027	Warm summer continental or hemiboreal	Dfb	5.9	374	43	7.2	32	47	21	1029800	2619600	94929	130150	112770	46884	88524	12590	11873	4159	9068	5278
mgp13011	4623661	209_GGACTCCT-TATCCTCT_L005_R1_001	Gibbons 2017	1636563095	16203595	46.682	-114.027	Warm summer continental or hemiboreal	Dfb	5.9	374	43	7.2	32	47	21	1479300	3733300	136630	189100	162530	66865	128900	17688	16548	5797	12763	6183
mgp13011	4623664	21_TAAGGCGA-ACTGCATA_L001_R1_001	Gibbons 2017	1391825046	13780446	46.682	-114.027	Warm summer continental or hemiboreal	Dfb	5.9	374	43	7.2	32	47	21	1317800	3362500	121450	173580	146060	61335	112400	15301	14368	4868	10888	6040
mgp13011	4623662	211_GGACTCCT-AGAGTAGA_L001_R1_001	Gibbons 2017	1775567678	17579878	46.682	-114.027	Warm summer continental or hemiboreal	Dfb	5.9	374	43	7.2	32	47	21	1563800	3972800	142950	201910	172470	70801	135640	18420	17093	5804	13263	5733
mgp13011	4623663	217_GGACTCCT-GTAAGGAG_L002_R1_001	Gibbons 2017	1945098198	19258398	46.682	-114.027	Warm summer continental or hemiboreal	Dfb	5.9	374	43	7.2	32	47	21	1781800	4515400	163400	230730	196440	81133	154730	21074	19538	6706	15662	7537
mgp13011	4623665	220_TAGGCATG-TAGATCGC_L001_R1_001	Gibbons 2017	1058172556	10476956	46.682	-114.027	Warm summer continental or hemiboreal	Dfb	5.9	374	43	7.2	32	47	21	1000000	2556800	91161	126670	109920	44375	85091	12103	11456	4635	9338	4333
mgp13011	4623666	224_TAGGCATG-CTCTCTAT_L002_R1_001	Gibbons 2017	1441625722	14273522	46.682	-114.027	Warm summer continental or hemiboreal	Dfb	5.9	374	43	7.2	32	47	21	1360700	3466900	125860	176040	150360	62372	115590	16683	15476	5422	12322	6558
mgp13011	4623667	226_GGACTCCT-ACTGCATA_L003_R1_001	Gibbons 2017	4063655816	40234216	46.682	-114.027	Warm summer continental or hemiboreal	Dfb	5.9	374	43	7.2	32	47	21	3769500	9572300	348740	484740	416920	172740	323070	44395	41435	15446	32156	17327
mgp13011	4623668	227_GGACTCCT-AAGGAGTA_L004_R1_001	Gibbons 2017	2176061059	21545159	46.682	-114.027	Warm summer continental or hemiboreal	Dfb	5.9	374	43	7.2	32	47	21	2037500	5155400	188880	257860	224680	92244	172900	25135	23329	8590	17917	10126
mgp13011	4623669	228_GGACTCCT-CTAAGCCT_L005_R1_001	Gibbons 2017	2357431405	23340905	46.682	-114.027	Warm summer continental or hemiboreal	Dfb	5.9	374	43	7.2	32	47	21	1930300	4890600	176600	246950	212310	86090	170500	23317	22210	7706	17086	8732
mgp13011	4623670	231_TAGGCATG-TATCCTCT_L003_R1_001	Gibbons 2017	1419250586	14051986	46.682	-114.027	Warm summer continental or hemiboreal	Dfb	5.9	374	43	7.2	32	47	21	1374900	3501100	127400	174490	151300	62780	117160	16592	15446	5697	12339	6550
mgp13011	4623671	24_TAAGGCGA-AGAGTAGA_L004_R1_001	Gibbons 2017	1802815862	17849662	46.682	-114.027	Warm summer continental or hemiboreal	Dfb	5.9	374	43	7.2	32	47	21	1807400	4581900	166880	233130	199690	83189	153530	21136	20195	7810	15706	8225
mgp13011	4623672	258_TAGGCATG-AGAGTAGA_L004_R1_001	Gibbons 2017	1610635385	15946885	46.682	-114.027	Warm summer continental or hemiboreal	Dfb	5.9	374	43	7.2	32	47	21	1468500	3724000	135500	188560	162140	67046	127120	17086	16555	5263	12079	7122
mgp13011	4623674	26_TAAGGCGA-AAGGAGTA_L002_R1_001	Gibbons 2017	1160768861	11492761	46.682	-114.027	Warm summer continental or hemiboreal	Dfb	5.9	374	43	7.2	32	47	21	1112000	2829600	103140	145610	123430	51866	95222	12977	12503	4260	9321	5006
mgp13011	4623673	268_TAGGCATG-GTAAGGAG_L005_R1_001	Gibbons 2017	1986017742	19663542	46.682	-114.027	Warm summer continental or hemiboreal	Dfb	5.9	374	43	7.2	32	47	21	1660400	4226800	151650	212060	183560	74978	145760	19327	19466	6129	13587	8539
mgp13011	4623675	277_TAGGCATG-ACTGCATA_L001_R1_001	Gibbons 2017	2254354441	22320341	46.682	-114.027	Warm summer continental or hemiboreal	Dfb	5.9	374	43	7.2	32	47	21	2081800	5310000	189750	265090	229600	95253	179290	23669	24629	7870	17420	10349
mgp13011	4623676	281_TAGGCATG-AAGGAGTA_L002_R1_001	Gibbons 2017	2477030858	24525058	46.682	-114.027	Warm summer continental or hemiboreal	Dfb	5.9	374	43	7.2	32	47	21	2285800	5861100	211730	287820	252420	103120	188910	27937	26492	10737	23494	12421
mgp13011	4623678	304_TAGGCATG-CTAAGCCT_L003_R1_001	Gibbons 2017	2655821260	26295260	46.682	-114.027	Warm summer continental or hemiboreal	Dfb	5.9	374	43	7.2	32	47	21	2430800	6159900	224520	316580	266150	110370	208130	28191	27225	20868	20868	11072
mgp13011	4623679	333_CTCTCTAC-CTCTCTAT_L005_R1_001	Gibbons 2017	2705204099	26784199	46.682	-114.027	Warm summer continental or hemiboreal	Dfb	5.9	374	43	7.2	32	47	21	2384700	6028800	219300	308800	262270	108010	204740	28197	26872	20985	20985	11651
mgp13011	4623680	334_CTCTCTAC-TAGATCGC_L004_R1_001	Gibbons 2017	1530670554	15155154	46.682	-114.027	Warm summer continental or hemiboreal	Dfb	5.9	374	43	7.2	32	47	21	1451300	3669600	131880	188450	159180	65346	125270	16784	16357	12529	12529	6685
mgp13011	4623681	349_CTCTCTAC-TATCCTCT_L001_R1_001	Gibbons 2017	1543227379	15279479	46.682	-114.027	Warm summer continental or hemiboreal	Dfb	5.9	374	43	7.2	32	47	21	1534500	3903900	140500	201000	169120	70731	130160	18025	17140	13532	13532	6779
mgp13011	4623682	350_CTCTCTAC-AGAGTAGA_L002_R1_001	Gibbons 2017	1556593416	15411816	46.682	-114.027	Warm summer continental or hemiboreal	Dfb	5.9	374	43	7.2	32	47	21	1551400	3924500	141060	196790	170040	70305	131560	17239	17344	13209	13209	8038
mgp13011	4623683	351_CTCTCTAC-GTAAGGAG_L003_R1_001	Gibbons 2017	626477851	6202751	46.682	-114.027	Warm summer continental or hemiboreal	Dfb	5.9	374	43	7.2	32	47	21	709020	1802200	64397	88143	77923	32806	58204	7873	8010	6126	6126	4120
mgp13011	4623684	352_CTCTCTAC-ACTGCATA_L004_R1_001	Gibbons 2017	382385697	3785997	46.682	-114.027	Warm summer continental or hemiboreal	Dfb	5.9	374	43	7.2	32	47	21	346510	869490	31576	44870	38015	16176	30366	3829	4045	3021	3021	1320
mgp13011	4623686	38_TAAGGCGA-CTAAGCCT_L003_R1_001	Gibbons 2017	1107281281	10963181	46.682	-114.027	Warm summer continental or hemiboreal	Dfb	5.9	374	43	7.2	32	47	21	1042100	2635300	95309	136170	114370	48412	89260	11681	11205	8457	8457	3962
mgp13011	4623685	381_CTCTCTAC-AAGGAGTA_L005_R1_001	Gibbons 2017	2246258079	22240179	46.682	-114.027	Warm summer continental or hemiboreal	Dfb	5.9	374	43	7.2	32	47	21	1984600	5047200	182040	260390	217140	91057	169520	23084	22599	17352	17352	8923
mgp13011	4623687	391_CTCTCTAC-CTAAGCCT_L001_R1_001	Gibbons 2017	425125766	4209166	46.682	-114.027	Warm summer continental or hemiboreal	Dfb	5.9	374	43	7.2	32	47	21	369950	930420	34336	46595	40275	17227	31131	4242	4044	3272	3272	1557
mgp13011	4623688	400_CAGAGAGG-CTCTCTAT_L003_R1_001	Gibbons 2017	1664009037	16475337	46.682	-114.027	Warm summer continental or hemiboreal	Dfb	5.9	374	43	7.2	32	47	21	1624600	4110000	149810	211780	178060	74693	137260	18505	17905	13986	13986	7804
mgp13011	4623689	402_CAGAGAGG-TATCCTCT_L004_R1_001	Gibbons 2017	1505819100	14909100	46.682	-114.027	Warm summer continental or hemiboreal	Dfb	5.9	374	43	7.2	32	47	21	1421200	3610800	130270	181820	157890	65077	121410	16827	15982	12426	12426	6340
mgp13011	4623690	407_CAGAGAGG-TAGATCGC_L002_R1_001	Gibbons 2017	1760535141	17431041	46.682	-114.027	Warm summer continental or hemiboreal	Dfb	5.9	374	43	7.2	32	47	21	1720500	4358200	156980	221100	188980	78171	147120	20019	19178	15329	15329	7560
mgp13011	4623694	41_CGTACTAG-TAGATCGC_L004_R1_001	Gibbons 2017	1606518524	15906124	46.682	-114.027	Warm summer continental or hemiboreal	Dfb	5.9	374	43	7.2	32	47	21	1532200	3901000	140320	200390	169100	70212	131250	18048	16965	13518	13518	6980
mgp13011	4623691	415_CAGAGAGG-ACTGCATA_L002_R1_001	Gibbons 2017	1260382232	12479032	46.682	-114.027	Warm summer continental or hemiboreal	Dfb	5.9	374	43	7.2	32	47	21	1263000	3185900	116270	159030	138880	58126	107080	15032	14064	11052	11052	5727
mgp13011	4623692	418_CAGAGAGG-AGAGTAGA_L005_R1_001	Gibbons 2017	1205724769	11937869	46.682	-114.027	Warm summer continental or hemiboreal	Dfb	5.9	374	43	7.2	32	47	21	1131400	2847900	104910	145280	123910	52257	96896	13344	12480	9959	9959	5142
mgp13011	4623693	419_CAGAGAGG-GTAAGGAG_L001_R1_001	Gibbons 2017	129101735	1278235	46.682	-114.027	Warm summer continental or hemiboreal	Dfb	5.9	374	43	7.2	32	47	21	133660	338000	12403	17108	14686	6128	11026	1508	1512	1217	1217	617
mgp13011	4623695	421_CAGAGAGG-AAGGAGTA_L003_R1_001	Gibbons 2017	1413505807	13995107	46.682	-114.027	Warm summer continental or hemiboreal	Dfb	5.9	374	43	7.2	32	47	21	1282900	3251900	118300	165710	140880	58998	107120	15122	14623	11123	11123	6008
mgp13011	4623697	49_CGTACTAG-CTCTCTAT_L005_R1_001	Gibbons 2017	3061850855	30315355	46.682	-114.027	Warm summer continental or hemiboreal	Dfb	5.9	374	43	7.2	32	47	21	2548500	6396200	233830	322920	280920	115610	221310	30287	29009	21383	21383	11407
mgp13011	4623698	59_CGTACTAG-TATCCTCT_L001_R1_001	Gibbons 2017	1977456275	19578775	46.682	-114.027	Warm summer continental or hemiboreal	Dfb	5.9	374	43	7.2	32	47	21	2035000	5126700	188900	260730	224220	94723	165680	23099	22056	17887	17887	15641
mgp13011	4623699	66_CGTACTAG-AGAGTAGA_L002_R1_001	Gibbons 2017	3162578559	31312659	46.682	-114.027	Warm summer continental or hemiboreal	Dfb	5.9	374	43	7.2	32	47	21	3056400	7717400	281630	387830	337860	140450	257710	36833	34000	26510	26510	16146
mgp13011	4623700	7_TAAGGCGA-TATCCTCT_L003_R1_001	Gibbons 2017	1248483725	12361225	46.682	-114.027	Warm summer continental or hemiboreal	Dfb	5.9	374	43	7.2	32	47	21	1137400	2886800	104470	146500	125010	51448	98785	13198	12432	4160	9617	4823
mgp13011	4623701	90_CGTACTAG-ACTGCATA_L004_R1_001	Gibbons 2017	2655975487	26296787	46.682	-114.027	Warm summer continental or hemiboreal	Dfb	5.9	374	43	7.2	32	47	21	2459600	6243400	227500	316290	273620	113170	208820	29611	28192	9968	22182	11021
mgp13011	4623702	94_CGTACTAG-GTAAGGAG_L003_R1_001	Gibbons 2017	1273222261	12606161	46.682	-114.027	Warm summer continental or hemiboreal	Dfb	5.9	374	43	7.2	32	47	21	1230400	3132300	113340	160800	135930	56533	105430	14701	13863	4718	11077	5516
mgp6787	4543770	C1.contigWithCov	Guo 2016	2802389196	5503592	42.3948	-85.3739	Hot summer continental	Dfa	8.7	912	105	6.1	51	32	17	1221500	4624800	86107	158220	130340	54316	60974	10934	10393	6412	10830	14306
mgp6787	4543771	C2.contigWithCov	Guo 2016	3001168673	5944107	42.3948	-85.3739	Hot summer continental	Dfa	8.7	912	105	6.1	51	32	17	1304700	4816200	93450	170710	139270	58669	64515	11861	11554	7019	11760	14070
mgp6787	4543772	C3.contigWithCov	Guo 2016	3519218745	7033413	42.3948	-85.3739	Hot summer continental	Dfa	8.7	912	105	6.1	51	32	17	1555800	5628000	111970	199010	167570	70026	78528	13694	13493	8302	14007	17562
mgp6787	4543773	C4.contigWithCov	Guo 2016	3342188659	6801453	42.3948	-85.3739	Hot summer continental	Dfa	8.7	912	105	6.1	51	32	17	1495800	5320100	107830	193630	161960	66336	73499	13299	13037	8034	13216	16883
mgp6787	4543774	C5.contigWithCov	Guo 2016	3656016194	7248199	42.3948	-85.3739	Hot summer continental	Dfa	8.7	912	105	6.1	51	32	17	1642400	5985300	118070	213040	177450	73561	81412	14092	14407	9027	14410	19118
mgp6787	4543775	C6.contigWithCov	Guo 2016	3239323040	6430052	42.3948	-85.3739	Hot summer continental	Dfa	8.7	912	105	6.1	51	32	17	1533100	5620800	107690	204600	165160	67452	74180	13383	13487	8371	13438	18501
mgp6787	4543776	C7.contigWithCov	Guo 2016	3044683146	6104071	42.3948	-85.3739	Hot summer continental	Dfa	8.7	912	105	6.1	51	32	17	1450500	5249700	102540	192280	155750	63942	70694	12913	12739	7678	13125	17189
mgp6787	4543777	M1.contigWithCov	Guo 2016	3641445144	7748864	42.3948	-85.3739	Hot summer continental	Dfa	8.7	912	105	6.1	51	32	17	1622500	5547600	118190	208840	177170	72780	82177	15011	14894	9873	14682	16477
mgp6787	4543778	M2.contigWithCov	Guo 2016	3595458649	7646400	42.3948	-85.3739	Hot summer continental	Dfa	8.7	912	105	6.1	51	32	17	1596100	5451800	116400	207080	173380	71178	79732	14665	14324	9242	14085	15900
mgp6787	4543779	M3.contigWithCov	Guo 2016	3367825461	7167505	42.3948	-85.3739	Hot summer continental	Dfa	8.7	912	105	6.1	51	32	17	1545100	5267100	112690	198040	168820	69225	77828	14058	14002	9095	13700	15498
mgp6787	4543780	M4.contigWithCov	Guo 2016	2775431641	5981679	42.3948	-85.3739	Hot summer continental	Dfa	8.7	912	105	6.1	51	32	17	1268800	4311800	92656	161760	138260	56641	64686	11612	11376	7118	11500	12501
mgp6787	4543781	M5.contigWithCov	Guo 2016	2932326296	6295398	42.3948	-85.3739	Hot summer continental	Dfa	8.7	912	105	6.1	51	32	17	1325800	4532900	96794	170920	143880	59199	66711	12440	12115	7509	12065	12976
mgp6787	4543782	M6.contigWithCov	Guo 2016	2727849635	5901128	42.3948	-85.3739	Hot summer continental	Dfa	8.7	912	105	6.1	51	32	17	1265900	4294900	92640	161640	137800	56756	63991	11529	11072	7128	11310	12440
mgp6787	4543783	M7.contigWithCov	Guo 2016	2698799435	5730646	42.3948	-85.3739	Hot summer continental	Dfa	8.7	912	105	6.1	51	32	17	1274800	4267300	95245	165490	139420	57873	66566	11953	11694	7603	11004	13229
mgp6787	4543784	S1.contigWithCov	Guo 2016	2832577702	6046926	42.3948	-85.3739	Hot summer continental	Dfa	8.7	912	105	6.1	51	32	17	1314300	4476300	95517	163100	143420	58020	66904	12387	12052	7430	11988	12777
mgp6787	4543785	S2.contigWithCov	Guo 2016	2497624874	5271946	42.3948	-85.3739	Hot summer continental	Dfa	8.7	912	105	6.1	51	32	17	1178300	3977300	86373	146540	128340	51911	61621	10924	10885	6914	10775	11524
mgp6787	4543786	S3.contigWithCov	Guo 2016	2970568996	6362710	42.3948	-85.3739	Hot summer continental	Dfa	8.7	912	105	6.1	51	32	17	1371900	4692500	98631	170190	150680	60000	69533	12446	12706	8015	12550	13404
mgp6787	4543787	S4.contigWithCov	Guo 2016	2889374366	6225304	42.3948	-85.3739	Hot summer continental	Dfa	8.7	912	105	6.1	51	32	17	1307500	4482000	93677	160310	143560	57405	65804	12207	12118	7334	12059	12390
mgp6787	4543788	S5.contigWithCov	Guo 2016	2425302998	5080839	42.3948	-85.3739	Hot summer continental	Dfa	8.7	912	105	6.1	51	32	17	1152600	3867600	84302	144260	126570	50960	60663	10428	10459	6578	10400	11018
mgp6787	4543789	S6.contigWithCov	Guo 2016	2953911202	6309742	42.3948	-85.3739	Hot summer continental	Dfa	8.7	912	105	6.1	51	32	17	1337300	4535500	97214	166480	146130	59113	68011	12611	12260	7590	12198	12909
mgp6787	4543790	S7.contigWithCov	Guo 2016	2662683609	5711024	42.3948	-85.3739	Hot summer continental	Dfa	8.7	912	105	6.1	51	32	17	1240700	4211500	89830	155490	134310	54457	62927	11432	11070	6801	11686	11958
mgp13620	4633085	A7_ATCACG_L007_001	Howe 2016	4805128530	47575530	41.9206	-93.7497	Hot summer continental	Dfa	8.9	842	17	6.3	26	47	26	5193700	13016000	481350	643220	563370	231880	429120	62728	60688	27617	47858	19938
mgp13620	4633087	A9_ACTTGA_L006_001	Howe 2016	2527541766	25025166	41.9206	-93.7497	Hot summer continental	Dfa	8.9	842	17	6.3	26	47	26	2355300	5935000	219400	299180	255290	104860	194790	29512	27880	12716	22256	9664
mgp13620	4633088	B10_GAGTGG_L007_001	Howe 2016	5290553720	52381720	41.9206	-93.7497	Hot summer continental	Dfa	8.9	842	17	6.3	26	47	26	5385000	13641000	504140	695620	587570	238580	444740	67974	64292	29044	51626	23108
mgp13620	4633089	B11_ACTGAT_L007_001	Howe 2016	7376359058	73033258	41.9206	-93.7497	Hot summer continental	Dfa	8.9	842	17	6.3	26	47	26	6554100	16601000	609320	836980	709400	286680	543750	83783	78725	36251	63279	28154
mgp13620	4633090	B12_ATTCCT_L007_001	Howe 2016	6535028250	64703250	41.9206	-93.7497	Hot summer continental	Dfa	8.9	842	17	6.3	26	47	26	6688100	16713000	618940	835770	720780	295400	551710	81875	77104	36512	61605	26589
mgp13620	4633092	B2_AGTTCC_L006_001	Howe 2016	7611262838	75359038	41.9206	-93.7497	Hot summer continental	Dfa	8.9	842	17	6.3	26	47	26	8750100	21834000	813090	1095800	948080	394480	712840	108280	101650	47192	82096	34665
mgp13620	4633093	B3_ATGTCA_L006_001	Howe 2016	456193568	4516768	41.9206	-93.7497	Hot summer continental	Dfa	8.9	842	17	6.3	26	47	26	552570	1368400	51591	68627	60082	24895	46122	6627	6365	2714	5060	2125
mgp13620	4633098	B8_GTTTCG_L007_001	Howe 2016	5533218340	54784340	41.9206	-93.7497	Hot summer continental	Dfa	8.9	842	17	6.3	26	47	26	5358100	13550000	500130	684660	582590	233230	445360	69195	65225	29544	51689	23018
mgp13620	4633188	H15_GATCAG_L003_001	Howe 2016	4315928364	42731964	41.9206	-93.7497	Hot summer continental	Dfa	8.9	842	17	6.3	26	47	26	3770000	9560900	348360	480670	412950	164990	310580	48559	44921	21182	36876	17092
mgp13620	4635362	H4_GCCAAT_L006_001	Howe 2016	20524028604	203208204	41.9206	-93.7497	Hot summer continental	Dfa	8.9	842	17	6.3	26	47	26	13998000	35227000	1286500	1774600	1536600	597210	1194900	174660	171500	78523	135280	66334
mgp13620	4633120	H7_AGTCAA_L003_001	Howe 2016	7747986740	76712740	41.9206	-93.7497	Hot summer continental	Dfa	8.9	842	17	6.3	26	47	26	3969300	10077000	367070	505710	432750	173790	326780	50231	46898	22446	39335	17419
mgp13620	4633122	H9_ATCACG_L008_001	Howe 2016	8778023120	86911120	41.9206	-93.7497	Hot summer continental	Dfa	8.9	842	17	6.3	26	47	26	9810100	24622000	904510	1239500	1062200	426450	811020	120580	115030	53875	94583	42419
mgp6368	4539514	1424.1.1371 trimmed	Howe 2014	7056524217	87224214	41.7711	-92.9617	Hot summer continental	Dfa	8.8	878	17	6.3	26	47	26	6351000	15068000	602770	782930	709530	271690	621700	83256	80500	32737	54338	26217
mgp6368	4539515	1424.2.1371 trimmed	Howe 2014	7669345313	94610611	41.7711	-92.9617	Hot summer continental	Dfa	8.8	878	17	6.3	26	47	26	7241300	17205000	686350	890960	809920	310130	706950	95143	92255	37048	62745	29756
mgp6368	4539516	1424.3.1371 trimmed	Howe 2014	7610751864	94581380	41.7711	-92.9617	Hot summer continental	Dfa	8.8	878	17	6.3	26	47	26	6921900	16432000	653780	855260	773850	297220	678950	91332	88775	35958	59629	28183
mgp6368	4539517	1424.4.1371 trimmed	Howe 2014	7904832499	98333698	41.7711	-92.9617	Hot summer continental	Dfa	8.8	878	17	6.3	26	47	26	7167500	17028000	677030	882150	800950	306420	704540	94074	91661	37674	62412	29523
mgp6368	4539518	1424.5.1371 trimmed	Howe 2014	3708849455	43732113	41.7711	-92.9617	Hot summer continental	Dfa	8.8	878	17	6.3	26	47	26	3531100	8392300	335740	435040	396380	152000	341650	46732	45454	18434	30121	14459
mgp6368	4539519	1424.6.1371 trimmed	Howe 2014	7602022910	94271386	41.7711	-92.9617	Hot summer continental	Dfa	8.8	878	17	6.3	26	47	26	6799500	16140000	643300	837230	761820	291700	666080	88386	87370	35376	58516	27900
mgp6368	4539520	1424.7.1371 trimmed	Howe 2014	7772737156	95625033	41.7711	-92.9617	Hot summer continental	Dfa	8.8	878	17	6.3	26	47	26	7477500	17782000	708590	922420	837130	320570	727300	98199	95127	38210	64112	30732
mgp6368	4539521	1425.1.1367 trimmed	Howe 2014	5639635894	70989994	41.7711	-92.9617	Hot summer continental	Dfa	8.8	878	17	6.3	26	47	26	4932600	11633000	464480	608790	550780	207890	491400	64869	63777	25636	42383	19723
mgp6368	4539522	1425.2.1367 trimmed	Howe 2014	8298450011	105967276	41.7711	-92.9617	Hot summer continental	Dfa	8.8	878	17	6.3	26	47	26	6937800	16362000	650430	855660	773440	294230	696200	91675	89861	35571	60265	28232
mgp6368	4539523	1425.3.1367 trimmed	Howe 2014	8223202056	104952205	41.7711	-92.9617	Hot summer continental	Dfa	8.8	878	17	6.3	26	47	26	6964600	16432000	655030	859840	780080	294550	696740	92428	88921	35469	60509	28070
mgp6368	4539524	1425.4.1367 trimmed	Howe 2014	7940446217	100671525	41.7711	-92.9617	Hot summer continental	Dfa	8.8	878	17	6.3	26	47	26	6894000	16265000	651070	850370	770440	292140	687490	91017	87662	35318	59846	27962
mgp6368	4539525	1425.5.1367 trimmed	Howe 2014	7820448206	100138529	41.7711	-92.9617	Hot summer continental	Dfa	8.8	878	17	6.3	26	47	26	6521200	15376000	612960	804770	728680	275700	654730	87042	83015	33565	56538	25928
mgp6368	4539526	1425.6.1367 trimmed	Howe 2014	7868969289	100689719	41.7711	-92.9617	Hot summer continental	Dfa	8.8	878	17	6.3	26	47	26	6676500	15748000	626470	823600	746840	282450	666730	88234	84896	33960	57497	26441
mgp6368	4539527	1425.7.1367 trimmed	Howe 2014	7664935098	98496588	41.7711	-92.9617	Hot summer continental	Dfa	8.8	878	17	6.3	26	47	26	6357500	14991000	595950	786740	708450	267970	637560	84513	81181	33086	54675	25679
mgp6377	4539578	1427.1.1377 trimmed	Howe 2014	9746152379	137054866	41.8272	-93.0086	Hot summer continental	Dfa	9	871	17	6.3	26	47	26	3620100	9966100	298710	514210	383050	134940	358270	38119	42136	24347	33895	8649
mgp6377	4539579	1427.2.1377 trimmed	Howe 2014	11583241547	167518968	41.8272	-93.0086	Hot summer continental	Dfa	9	871	17	6.3	26	47	26	3578700	9887200	293110	508790	379500	132270	359910	36944	41239	23572	33207	8687
mgp6377	4539580	1427.3.1377 trimmed	Howe 2014	12351703559	179109050	41.8272	-93.0086	Hot summer continental	Dfa	9	871	17	6.3	26	47	26	3957700	10876000	324870	562430	418030	148380	393240	41457	46304	26619	37179	9436
mgp6377	4539581	1427.4.1377 trimmed	Howe 2014	11004781140	158922931	41.8272	-93.0086	Hot summer continental	Dfa	9	871	17	6.3	26	47	26	3621300	9963000	296290	513390	382180	135140	361010	37301	41746	24417	33673	8849
mgp6377	4539582	1427.5.1377 trimmed	Howe 2014	11307462276	167339991	41.8272	-93.0086	Hot summer continental	Dfa	9	871	17	6.3	26	47	26	3185300	8818200	259410	457120	334660	116030	320970	32953	35211	21029	29643	7330
mgp6377	4539583	1427.6.1377 trimmed	Howe 2014	12018340835	176436132	41.8272	-93.0086	Hot summer continental	Dfa	9	871	17	6.3	26	47	26	3627400	9946100	296820	513360	383170	133560	362380	38427	41418	24464	33778	8569
mgp6377	4539584	1427.7.1377 trimmed	Howe 2014	11999335511	175744326	41.8272	-93.0086	Hot summer continental	Dfa	9	871	17	6.3	26	47	26	3640800	9993300	296860	514950	382630	134070	364290	38348	42150	24172	33942	8628
mgp6377	4539571	1461.1.1405 trimmed	Howe 2014	18328576290	213497494	41.8272	-93.0086	Hot summer continental	Dfa	9	871	17	6.3	26	47	26	12998000	35504000	1117600	1807300	1376900	528320	1179100	143720	158280	94521	126550	38784
mgp6377	4539572	1461.2.1405 trimmed	Howe 2014	18724092302	217514697	41.8272	-93.0086	Hot summer continental	Dfa	9	871	17	6.3	26	47	26	13522000	36900000	1165400	1880700	1437900	550090	1222400	149470	164240	98219	131300	40351
mgp6377	4539573	1461.3.1405 trimmed	Howe 2014	18569808348	217164987	41.8272	-93.0086	Hot summer continental	Dfa	9	871	17	6.3	26	47	26	13097000	35739000	1127100	1821300	1387700	530660	1187800	145020	158680	94459	127950	39753
mgp6377	4539574	1461.4.1405 trimmed	Howe 2014	17649818427	206083276	41.8272	-93.0086	Hot summer continental	Dfa	9	871	17	6.3	26	47	26	13167000	35587000	1152100	1817800	1395200	546590	1174800	148710	159600	97168	129400	40535
mgp6377	4539575	1461.5.1405 trimmed	Howe 2014	19954890565	233720367	41.8272	-93.0086	Hot summer continental	Dfa	9	871	17	6.3	26	47	26	14773000	39935000	1294700	2039900	1564500	612230	1322700	166340	180390	108240	145040	45727
mgp6377	4539576	1461.6.1405 trimmed	Howe 2014	18582589285	216366290	41.8272	-93.0086	Hot summer continental	Dfa	9	871	17	6.3	26	47	26	13239000	36141000	1141800	1840900	1404900	539030	1193800	145300	162210	96321	130200	39516
mgp6377	4539577	1461.7.1405 trimmed	Howe 2014	18579802988	215825187	41.8272	-93.0086	Hot summer continental	Dfa	9	871	17	6.3	26	47	26	13291000	36284000	1146700	1844100	1409700	540090	1201900	148500	161430	96688	128950	39618
mgp6377	4539585	604.2.778 trimmed	Howe 2014	1621837703	25377110	41.8272	-93.0086	Hot summer continental	Dfa	9	871	17	6.3	26	47	26	101280	259850	8239	16889	10569	3543	10108	1624	973	226	1461	269
mgp6377	4539586	850.1.1039 trimmed	Howe 2014	4512525899	64285342	41.8272	-93.0086	Hot summer continental	Dfa	9	871	17	6.3	26	47	26	606670	1397600	52034	100890	60192	24716	65304	11547	6085	1056	7622	1273
mgp6377	4539587	850.2.1039 trimmed	Howe 2014	4452926593	65147859	41.8272	-93.0086	Hot summer continental	Dfa	9	871	17	6.3	26	47	26	526620	1234200	44380	89490	51715	20723	54850	9437	5492	528	6595	1147
mgp6377	4539588	850.3.1039 trimmed	Howe 2014	4546163216	66649310	41.8272	-93.0086	Hot summer continental	Dfa	9	871	17	6.3	26	47	26	565180	1318400	47171	93212	56829	22744	60429	9953	5693	643	7285	1198
mgp6377	4539589	850.4.1039 trimmed	Howe 2014	4589553132	66626658	41.8272	-93.0086	Hot summer continental	Dfa	9	871	17	6.3	26	47	26	608650	1410000	52646	101460	61617	23896	63992	10544	6048	1122	7828	1299
mgp6377	4539590	850.5.1039 trimmed	Howe 2014	4582621593	66749607	41.8272	-93.0086	Hot summer continental	Dfa	9	871	17	6.3	26	47	26	592020	1371600	50585	99552	59184	23452	64049	10142	5854	740	7769	1114
mgp6377	4539591	850.6.1039 trimmed	Howe 2014	4565995156	65927593	41.8272	-93.0086	Hot summer continental	Dfa	9	871	17	6.3	26	47	26	622070	1437000	53234	102740	63348	25065	64896	11191	5695	1492	8247	1275
mgp6377	4539592	895.1.1070 trimmed	Howe 2014	4586417918	49874608	41.8272	-93.0086	Hot summer continental	Dfa	9	871	17	6.3	26	47	26	4283200	11819000	368680	580940	453440	180610	365840	46145	52155	30825	41751	13516
mgp6377	4539593	895.2.1070 trimmed	Howe 2014	4175070745	49910017	41.8272	-93.0086	Hot summer continental	Dfa	9	871	17	6.3	26	47	26	3222600	8837200	271440	443320	340350	131710	284600	35153	39323	23128	30778	9523
mgp6377	4539594	895.3.1070 trimmed	Howe 2014	4216911842	49522529	41.8272	-93.0086	Hot summer continental	Dfa	9	871	17	6.3	26	47	26	3371800	9253700	285830	460640	358930	138000	296280	36441	40466	24639	32125	10126
mgp6368	4539528	iowa-corn-GAII-round1	Howe 2014	37968936507	520346510	41.7711	-92.9617	Hot summer continental	Dfa	8.8	878	17	6.3	26	47	26	19128000	43044000	1791100	2444100	2109800	772110	2058400	283630	244550	85585	171420	62846
mgp11953	4470255	A2_DNA_1163.5.1212ONE	Hultman 2015	2143945902	18806543	64.6778	-157.833	Subarctic or boreal	Dfc	-4.6	344	293	4.9	26	60	14	2067700	4047100	211870	278230	227980	86313	219350	30140	28893	23079	21105	3901
mgp11953	4470378	A2_DNA_1311.1.1306.ONE	Hultman 2015	4143700272	36348248	64.6778	-157.833	Subarctic or boreal	Dfc	-4.6	344	293	4.9	26	60	14	3363700	6469400	340280	450370	372370	135310	365740	49532	46191	38384	33907	6115
mgp11953	4470253	A5_DNA_1163.1.1212ONE	Hultman 2015	1712528748	15022182	64.6778	-157.833	Subarctic or boreal	Dfc	-4.6	344	293	4.9	26	60	14	1550800	3023500	156370	217520	167600	62761	169040	21777	21078	18159	14962	2940
mgp11953	4470382	A5_DNA_1311.3.1306.ONE	Hultman 2015	4374118212	38369458	64.6778	-157.833	Subarctic or boreal	Dfc	-4.6	344	293	4.9	26	60	14	2877700	5440400	283210	402070	306700	109540	340050	42567	39909	33597	27869	5573
mgp11953	4470254	B3_DNA_1163.2.1212ONE	Hultman 2015	2160239580	18949470	64.6778	-157.833	Subarctic or boreal	Dfc	-4.6	344	293	4.9	26	60	14	1719300	3260200	172110	226020	176850	63234	203320	27303	24358	22966	11188	2901
mgp11953	4470381	B3_DNA_1311.2.1306.ONE	Hultman 2015	4436027166	38912519	64.6778	-157.833	Subarctic or boreal	Dfc	-4.6	344	293	4.9	26	60	14	2420700	4494800	239320	313910	245570	84401	308470	37150	34000	33374	14750	3150
mgp11953	4470315	B4_DNA_1209.04.1231ONE	Hultman 2015	2508737466	22006469	64.6778	-157.833	Subarctic or boreal	Dfc	-4.6	344	293	4.9	26	60	14	1750900	3343800	171010	232960	180600	59590	210390	29250	24187	26142	12375	2336
mgp11953	4469340	B4_DNA_1311.4.1306	Hultman 2015	8421304260	73871090	64.6778	-157.833	Subarctic or boreal	Dfc	-4.6	344	293	4.9	26	60	14	2443000	4617200	231910	332190	248480	84450	302660	41154	33910	36638	18111	3727
mgp11953	4469540	P1_DNA_1141.4.1206ONE	Hultman 2015	3542570292	31075178	64.6778	-157.833	Subarctic or boreal	Dfc	-4.6	344	293	4.9	26	60	14	2139500	3888600	223950	306880	216790	78911	288530	35739	29672	20934	12637	2646
mgp11953	4469538	P1_DNA_1141.5.1206ONE	Hultman 2015	3482173434	30545381	64.6778	-157.833	Subarctic or boreal	Dfc	-4.6	344	293	4.9	26	60	14	2027900	3700900	214630	291900	202020	74909	272710	33455	27981	19218	11130	2276
mgp11953	4470010	P3_DNA_1141.6.1206ONE	Hultman 2015	4664199306	40914029	64.6778	-157.833	Subarctic or boreal	Dfc	-4.6	344	293	4.9	26	60	14	1775700	3250900	167710	255540	176580	60634	259150	28774	22887	12166	11050	2164
mgp11953	4470009	P3_DNA_1141.7.1206ONE	Hultman 2015	4667382870	40941955	64.6778	-157.833	Subarctic or boreal	Dfc	-4.6	344	293	4.9	26	60	14	1829900	3344300	174940	263090	183010	64729	267620	30438	23823	13207	9941	2178
mgp3321	4513030	mandacaruD1	Kavamura PS 2018	125814492	1532644	-9.07436	-40.3301	Semi-arid hot desert	BSh	24.7	561	0	6.3	56	21	24	69803	168780	6522	9151	7850	3598	6059	1064	911	273	579	233
mgp3321	4513031	mandacaruD2	Kavamura PS 2018	257135719	2382249	-9.07439	-40.3301	Semi-arid hot desert	BSh	24.7	561	0	6.3	56	21	24	280950	672150	26640	37433	30910	14319	24966	3780	3340	1030	2211	704
mgp3321	4513032	mandacaruD3	Kavamura PS 2018	257469392	2282295	-9.07444	-40.3301	Semi-arid hot desert	BSh	24.7	561	0	6.3	56	21	24	286480	714860	27683	37362	31735	15579	23205	4146	3170	1141	2286	788
mgp3321	4513033	mandacaruR1	Kavamura PS 2018	50636933	584923	-9.07436	-40.3301	Semi-arid hot desert	BSh	24.7	561	0	6.3	56	21	24	33850	81547	3103	4392	3762	1885	3059	517	385	127	265	107
mgp3321	4513034	mandacaruR2	Kavamura PS 2018	176569232	1708373	-9.07439	-40.3301	Semi-arid hot desert	BSh	24.7	561	0	6.3	56	21	24	196460	472830	18795	26177	21597	10159	17391	2763	2314	769	1719	535
mgp3321	4513035	mandacaruR3	Kavamura PS 2018	225453657	2348555	-9.07444	-40.3301	Semi-arid hot desert	BSh	24.7	561	0	6.3	56	21	24	216990	508440	20969	28678	24054	11067	19799	3375	2511	813	1806	653
mgp79383	4737777	B2_R	Kerfahi 2018	827601973	4800016	69.07	-105.03	Tundra	ET	-14.5	135	267	6.8	39	27	34	718070	1946800	58798	78428	80296	31319	54727	7551	8583	8583	6223	3651
mgp79383	4737788	B3_R	Kerfahi 2018	669114809	3724183	69.07	-105.03	Tundra	ET	-14.5	135	267	6.8	39	27	34	675200	1817500	57350	74304	75082	30462	50353	7393	7959	7959	5845	3730
mgp79383	4737781	B5_R	Kerfahi 2018	784985600	4786750	69.07	-105.03	Tundra	ET	-14.5	135	267	6.8	39	27	34	621980	1654900	52058	67715	69165	27425	47845	6983	7142	7142	5264	3094
mgp18555	4704031	DP1_1_R	Kerfahi 2018	463935309	2503972	4.6537	114.52	Tropical rainforest	Af	27.2	3124	34	4.8	54	23	23	500400	1400300	41503	58749	54136	24718	32117	5100	5646	5646	4535	1921
mgp18555	4704028	DP1_2_R	Kerfahi 2018	419434430	2262162	4.6537	114.52	Tropical rainforest	Af	27.2	3124	34	4.8	54	23	23	430680	1238800	34385	50664	46061	20870	26734	4488	4936	4936	4163	1629
mgp18555	4704036	DP1_3_R	Kerfahi 2018	536504000	2918609	4.6537	114.52	Tropical rainforest	Af	27.2	3124	34	4.8	54	23	23	583330	1660700	48668	69126	62995	28919	36219	6417	6980	6980	5824	2275
mgp18555	4704040	DP2_1_R	Kerfahi 2018	397057159	2140650	4.6537	114.52	Tropical rainforest	Af	27.2	3124	34	4.8	54	23	23	415080	1186000	34034	48934	44791	20120	25597	4642	4836	4836	4199	1594
mgp18555	4704026	DP2_2_R	Kerfahi 2018	578855358	3148383	4.6537	114.52	Tropical rainforest	Af	27.2	3124	34	4.8	54	23	23	589870	1666600	47824	69327	63057	27977	36789	6165	7071	7071	5779	2131
mgp18555	4704033	DP2_3_R	Kerfahi 2018	367849677	1981122	4.6537	114.52	Tropical rainforest	Af	27.2	3124	34	4.8	54	23	23	404540	1140000	34107	47870	43856	20349	26090	4198	4721	4721	3985	1624
mgp79383	4737786	FRIM34_R	Kerfahi 2018	568646691	3144781	3.14	101.38	Tropical rainforest	Af	26.8	2199	186	5.5	43	30	28	554890	1581800	43691	63968	59311	26097	33166	6352	6628	6628	6113	2301
mgp79383	4737789	M10_R	Kerfahi 2018	611946111	3400585	2.03	103.82	Tropical rainforest	Af	26.1	2742	90	5.3	35	31	34	628060	1769600	49798	75231	65328	28384	37478	7112	7278	7278	6309	2392
mgp79383	4737787	M26_R	Kerfahi 2018	606969018	3371364	2.03	103.82	Tropical rainforest	Af	26.1	2742	90	5.3	35	31	34	642480	1801800	51405	77003	67759	30709	38614	7298	7521	7521	6524	2556
mgp79383	4737783	M5_R	Kerfahi 2018	681249131	3774990	2.03	103.82	Tropical rainforest	Af	26.1	2742	90	5.3	35	31	34	717920	1978400	58049	84321	76275	34744	44273	8187	8659	8659	7137	2701
mgp79383	4737793	MA12_R	Kerfahi 2018	595748742	3306532	1.91	103.18	Tropical rainforest	Af	26.1	2375	90	5.3	35	31	34	634560	1727300	52260	71923	68260	30857	40479	6597	7366	7366	6149	2512
mgp79383	4737790	MA15_R	Kerfahi 2018	602951902	3356630	1.91	103.18	Tropical rainforest	Af	26.1	2375	90	5.3	35	31	34	658940	1787200	54241	73902	71073	32651	41800	7029	7682	7682	6639	2600
mgp79383	4737784	MA24_R	Kerfahi 2018	578138936	3163050	1.91	103.18	Tropical rainforest	Af	26.1	2375	90	5.3	35	31	34	610560	1684100	49879	69210	65352	29149	38818	6579	7334	7334	5888	2356
mgp79383	4737782	PD1_R	Kerfahi 2018	645292060	3612053	2.51	104.09	Tropical rainforest	Af	26.5	2450	90	5.3	35	31	34	736310	2165400	67019	96417	86208	40094	53161	8096	7873	7873	6767	2656
mgp79383	4737792	PD5_R	Kerfahi 2018	765707108	4432158	2.51	104.09	Tropical rainforest	Af	26.5	2450	90	5.3	35	31	34	632520	1838900	55907	79953	73411	33314	45592	6729	6804	6804	6239	2540
mgp79383	4737785	PD7_R	Kerfahi 2018	779404589	4379781	2.51	104.09	Tropical rainforest	Af	26.5	2450	90	5.3	35	31	34	739730	2127200	59978	87949	80187	35556	48217	7644	8734	8734	7148	2838
mgp17194	4689235	S18	Kerfahi 2018	555132152	3124430	78.54	11.44	Tundra	ET	-5.1	411	122	6.3	48	42	10	644100	1717100	56398	75839	72634	30435	46897	7082	7429	7429	6027	2598
mgp17194	4689233	S19	Kerfahi 2018	561830320	3140836	78.54	11.44	Tundra	ET	-5.1	411	122	6.3	48	42	10	704710	1849600	63497	86306	78915	33968	51081	8284	8266	8266	6318	3011
mgp17194	4689234	S20	Kerfahi 2018	501747813	2809121	78.54	11.44	Tundra	ET	-5.1	411	122	6.3	48	42	10	598780	1587700	53153	71131	66703	28442	44489	6549	7291	7291	5397	2713
mgp17194	4689236	S21	Kerfahi 2018	592485956	3350243	78.54	11.44	Tundra	ET	-5.1	411	122	6.3	48	42	10	669150	1814600	57346	79593	74104	30953	48997	7150	7831	7831	6374	3005
mgp17194	4689231	S23	Kerfahi 2018	325298665	1822285	78.54	11.44	Tundra	ET	-5.1	411	122	6.3	48	42	10	365580	963640	32475	42570	41265	18099	27367	4024	4504	4504	3080	1729
mgp17194	4689240	S24	Kerfahi 2018	112874758	636690	78.54	11.44	Tundra	ET	-5.1	411	122	6.3	48	42	10	115710	307280	10038	13607	13164	5681	9197	1252	1528	1528	914	631
mgp17194	4689232	S25	Kerfahi 2018	284350629	1595602	78.54	11.44	Tundra	ET	-5.1	411	122	6.3	48	42	10	331120	888650	28678	38470	37018	16528	25868	3360	4275	4275	2596	1833
mgp17194	4689230	S27	Kerfahi 2018	385189960	2163027	78.54	11.44	Tundra	ET	-5.1	411	122	6.3	48	42	10	461430	1220800	40612	54630	51865	21905	35346	4822	5841	5841	3734	2438
mgp79383	4737791	S2C_R	Kerfahi 2018	848750412	4906802	74.28	-20.32	Tundra	ET	-10.7	256	165	6.4	50	31	19	786600	2072900	68274	93874	88027	35023	63662	7461	9519	9519	5661	2436
mgp79383	4737779	S3C_R	Kerfahi 2018	674748055	4094186	74.28	-20.32	Tundra	ET	-10.7	256	165	6.4	50	31	19	586690	1543400	51224	69651	65870	25643	47015	5916	7014	7014	4329	1877
mgp17194	4689239	S48	Kerfahi 2018	575792275	3178500	78.54	11.44	Tundra	ET	-5.1	411	122	6.3	48	42	10	706420	1874300	62440	84850	80033	34421	52022	7755	8197	8197	5996	2785
mgp17194	4689238	S49	Kerfahi 2018	489611291	2586211	78.54	11.44	Tundra	ET	-5.1	411	122	6.3	48	42	10	542230	1529000	45739	63978	59484	26677	38671	5480	6122	6122	4706	2156
mgp17194	4689228	S51	Kerfahi 2018	652155617	3552036	78.54	11.44	Tundra	ET	-5.1	411	122	6.3	48	42	10	792840	2105500	70769	93643	89194	37654	58223	8946	9300	9300	7159	3711
mgp17194	4689237	S52	Kerfahi 2018	348854546	1912205	78.54	11.44	Tundra	ET	-5.1	411	122	6.3	48	42	10	427270	1152200	37291	50924	48048	20298	30915	4508	4906	4906	3997	1826
mgp14949	4664136	R1_4_1	Kumaresan 2017	775779881	4191866	-29.1647	116.787	Semi-arid hot desert	BSh	19.8	285	18	7.3	72	11	17	406570	1060100	36452	52151	45826	20569	32409	4365	4903	1586	3054	1307
mgp14949	4664135	R1_6_1	Kumaresan 2017	605024488	3274022	-29.1647	116.787	Semi-arid hot desert	BSh	19.8	285	18	7.3	72	11	17	289150	765040	26016	38364	32570	15186	22604	2706	3351	1088	2037	698
mgp14949	4664124	R2_4_1	Kumaresan 2017	564566045	3027365	-29.1647	116.787	Semi-arid hot desert	BSh	19.8	285	18	7.3	72	11	17	291050	777580	25714	38415	31932	14809	22834	3071	3376	1307	2218	926
mgp14949	4664125	R2_6_1	Kumaresan 2017	990862622	5356084	-29.1647	116.787	Semi-arid hot desert	BSh	19.8	285	18	7.3	72	11	17	515670	1299800	46867	67941	58208	26914	42792	4951	6061	1762	3720	1493
mgp14949	4664131	T0S	Kumaresan 2017	548206461	2971565	-29.1647	116.787	Semi-arid hot desert	BSh	19.8	285	18	7.3	72	11	17	354030	885350	31696	44650	39691	18187	27532	4101	4212	1092	2457	1290
mgp14949	4664147	T0S1	Kumaresan 2017	409821189	2185128	-29.1647	116.787	Semi-arid hot desert	BSh	19.8	285	18	7.3	72	11	17	353940	839120	31140	37381	39961	17889	28530	4934	4268	1580	2749	1812
mgp14949	4664132	T0S2	Kumaresan 2017	743136365	4092658	-29.1647	116.787	Semi-arid hot desert	BSh	19.8	285	18	7.3	72	11	17	593830	1437300	52946	64623	66372	30136	46566	7741	7000	2306	4538	2884
mgp14949	4664134	T0S5	Kumaresan 2017	891843317	4879625	-29.1647	116.787	Semi-arid hot desert	BSh	19.8	285	18	7.3	72	11	17	634530	1605700	57976	77205	70956	33207	48165	7551	7046	2055	4441	2556
mgp14949	4664137	T1S	Kumaresan 2017	637309471	3457837	-29.1647	116.787	Semi-arid hot desert	BSh	19.8	285	18	7.3	72	11	17	443170	1108000	40106	54897	48953	22501	33606	5020	5118	1336	2990	1615
mgp14949	4664129	T1S1	Kumaresan 2017	878981737	4847947	-29.1647	116.787	Semi-arid hot desert	BSh	19.8	285	18	7.3	72	11	17	742120	1776700	65028	76755	84446	35664	59310	7666	9082	3281	5345	4819
mgp14949	4664127	T1S2	Kumaresan 2017	899265650	4949673	-29.1647	116.787	Semi-arid hot desert	BSh	19.8	285	18	7.3	72	11	17	807550	1977300	71534	85758	90613	38736	62232	8556	9827	3322	5531	5156
mgp14949	4664128	T1S5	Kumaresan 2017	774612671	4247839	-29.1647	116.787	Semi-arid hot desert	BSh	19.8	285	18	7.3	72	11	17	613040	1508200	54778	70207	68191	31092	46444	6616	7113	2132	4141	2986
mgp14949	4664138	T4S	Kumaresan 2017	540034515	2912064	-29.1647	116.787	Semi-arid hot desert	BSh	19.8	285	18	7.3	72	11	17	377360	944400	33722	46475	41980	18605	29059	4092	4500	1296	2670	1519
mgp14949	4664133	T4S1	Kumaresan 2017	757840706	4160749	-29.1647	116.787	Semi-arid hot desert	BSh	19.8	285	18	7.3	72	11	17	673350	1596700	60267	69988	75719	33408	51607	7538	7984	2742	4471	3855
mgp14949	4664130	T4S2	Kumaresan 2017	870106508	4700891	-29.1647	116.787	Semi-arid hot desert	BSh	19.8	285	18	7.3	72	11	17	698310	1680900	61826	75104	78414	33333	54159	8232	8484	3007	5228	4190
mgp14949	4664126	T4S5	Kumaresan 2017	701416826	3788763	-29.1647	116.787	Semi-arid hot desert	BSh	19.8	285	18	7.3	72	11	17	579740	1423000	51686	65400	63497	28210	42719	6767	6797	2026	4083	3199
mgp8742	4565459	ForestCenter	Luis Castañeda 2017	61669011	141694	-33.58	-71.37	Mediterranean warm/cool summer	Csb	15.6	477	33	6.4	55	25	20	40962	115580	3540	4630	4662	1877	2680	500	451	197	389	282
mgp8742	4565463	ForestNorth	Luis Castañeda 2017	78236955	178272	-32.87	-71.12	Mediterranean warm/cool summer	Csb	13.4	377	33	6.4	55	25	20	47036	131650	3948	5179	5293	2213	3251	446	528	236	477	376
mgp8742	4565458	ForestSouth	Luis Castañeda 2017	87262168	195138	-34.6	-71.12	Mediterranean warm/cool summer	Csb	13.5	772	33	6.4	55	25	20	45925	128770	3904	4970	5211	2258	3015	516	515	200	461	220
mgp8742	4565460	VineyardCenter	Luis Castañeda 2017	84497008	189372	-33.58	-71.37	Mediterranean warm/cool summer	Csb	15.6	477	33	6.4	55	25	20	50030	141670	4172	5655	5736	2323	3483	530	585	238	493	382
mgp8742	4565462	VineyardNorth	Luis Castañeda 2017	94090245	208095	-32.87	-71.12	Mediterranean warm/cool summer	Csb	13.4	377	33	6.4	55	25	20	38535	106440	3297	4360	4542	1794	2668	435	431	192	334	271
mgp8742	4565461	VineyardSouth	Luis Castañeda 2017	86785396	201266	-34.6	-71.12	Mediterranean warm/cool summer	Csb	13.5	772	33	6.4	55	25	20	48374	134700	4047	5521	5337	2426	3395	487	518	252	418	241
mgp4362	4521497	1F_a	Mendes 2015	21258091	116867	-25.0711	-47.9228	Humid subtropical	Cfa	22	2412	30	4.9	66	15	20	17173	48774	1407	2046	1834	764	1320	200	227	148	160	67
mgp4362	4521499	1M_a	Mendes 2015	129226387	544766	-25.085	-47.9614	Humid subtropical	Cfa	22	2412	30	4.9	66	15	20	144550	331460	13709	13536	16391	7158	13575	2557	1898	584	1367	484
mgp4362	4521501	1R_a	Mendes 2015	168587759	686124	-25.0711	-47.9239	Humid subtropical	Cfa	22	2412	30	4.9	66	15	20	105530	293370	8494	12848	11131	4635	8084	958	1317	751	901	345
mgp4362	4521503	2F_a	Mendes 2015	13524850	72900	-25.0711	-47.9228	Humid subtropical	Cfa	22	2412	30	4.9	66	15	20	11222	31788	967	1330	1198	513	856	98	130	67	96	49
mgp4362	4521505	2M_a	Mendes 2015	228098028	939772	-25.085	-47.9614	Humid subtropical	Cfa	22	2412	30	4.9	66	15	20	241410	568770	22523	24798	26939	12079	22389	3858	2995	971	2337	951
mgp4362	4521507	2R_a	Mendes 2015	115636155	481069	-25.0711	-47.9239	Humid subtropical	Cfa	22	2412	30	4.9	66	15	20	79433	220980	6320	9459	8389	3513	5778	660	923	632	625	249
mgp4362	4521509	3F_a	Mendes 2015	23893592	131160	-25.0711	-47.9228	Humid subtropical	Cfa	22	2412	30	4.9	66	15	20	19984	56801	1691	2369	2117	946	1464	219	253	124	205	75
mgp4362	4521511	3M_a	Mendes 2015	282848961	1172726	-25.085	-47.9614	Humid subtropical	Cfa	22	2412	30	4.9	66	15	20	324850	762470	30343	33851	35815	16350	29651	5122	3949	1325	3006	1334
mgp7774	4478038	10LM	Mendes 2014	73786733	140141	-11.7413	-56.2533	Tropical wet and dry or savanna	Aw	25.2	1933	15	4.9	70	9	22	35192	101230	3019	4330	3950	1784	2781	361	446	292	331	176
mgp7774	4478222	11LM	Mendes 2014	74737637	142020	-11.7413	-56.2533	Tropical wet and dry or savanna	Aw	25.2	1933	15	4.9	70	9	22	28623	83802	2447	3529	3292	1395	2235	347	384	238	272	108
mgp7774	4478283	12LM	Mendes 2014	73942895	140261	-11.7413	-56.2533	Tropical wet and dry or savanna	Aw	25.2	1933	15	4.9	70	9	22	35301	102750	2980	4088	4068	1761	2870	360	496	275	305	188
mgp7774	4478290	13LM	Mendes 2014	77192998	147028	-11.6833	-55.8358	Tropical wet and dry or savanna	Aw	25.1	1812	15	4.9	70	9	22	39740	113070	3450	4655	4552	1972	2939	447	507	305	431	230
mgp7774	4478292	14LM	Mendes 2014	68378389	129829	-11.6833	-55.8358	Tropical wet and dry or savanna	Aw	25.1	1812	15	4.9	70	9	22	32329	94021	2824	3901	3649	1625	2553	356	389	286	348	197
mgp7774	4478291	15LM	Mendes 2014	59112731	112056	-11.6833	-55.8358	Tropical wet and dry or savanna	Aw	25.1	1812	15	4.9	70	9	22	20452	58659	1711	2413	2326	1055	1524	221	267	197	229	112
mgp7774	4478294	16LM	Mendes 2014	72823122	138556	-11.6833	-55.8358	Tropical wet and dry or savanna	Aw	25.1	1812	15	4.9	70	9	22	30171	88646	2553	3542	3363	1549	2271	297	381	267	281	156
mgp7774	4478936	17LM	Mendes 2014	72235815	137939	-11.6833	-55.8358	Tropical wet and dry or savanna	Aw	25.1	1812	15	4.9	70	9	22	33826	99128	2929	3941	3827	1801	2625	335	394	274	337	168
mgp7774	4478937	18LM	Mendes 2014	76798363	146385	-11.6833	-55.8358	Tropical wet and dry or savanna	Aw	25.1	1812	15	4.9	70	9	22	31143	90648	2718	3667	3388	1454	2407	322	379	241	272	148
mgp7774	4478938	19LM	Mendes 2014	66071784	126119	-11.6833	-55.8358	Tropical wet and dry or savanna	Aw	25.1	1812	15	4.9	70	9	22	21723	60352	1859	2504	2450	1107	1783	239	267	191	176	145
mgp7774	4477751	1LM	Mendes 2014	74088056	141552	-11.6833	-55.8358	Tropical wet and dry or savanna	Aw	25.1	1812	15	4.9	70	9	22	36221	105050	3087	4148	4231	1848	2740	339	471	310	363	205
mgp7774	4478939	20LM	Mendes 2014	69961802	133146	-11.7413	-56.2533	Tropical wet and dry or savanna	Aw	25.2	1933	15	4.9	70	9	22	32829	92327	2797	3818	3730	1588	2493	352	427	217	308	185
mgp7774	4479311	21LM	Mendes 2014	79557283	151804	-11.7413	-56.2533	Tropical wet and dry or savanna	Aw	25.2	1933	15	4.9	70	9	22	42804	119720	3773	4949	4972	2199	3306	468	561	283	364	266
mgp7774	4478940	22LM	Mendes 2014	72236578	138073	-11.7413	-56.2533	Tropical wet and dry or savanna	Aw	25.2	1933	15	4.9	70	9	22	33927	95947	3035	3845	3873	1805	2652	323	409	255	301	181
mgp7774	4478941	23LM	Mendes 2014	75538772	143858	-11.7413	-56.2533	Tropical wet and dry or savanna	Aw	25.2	1933	15	4.9	70	9	22	32796	93655	2982	3704	3750	1657	2600	337	400	279	284	158
mgp7774	4478943	24LM	Mendes 2014	64862607	123137	-11.7413	-56.2533	Tropical wet and dry or savanna	Aw	25.2	1933	15	4.9	70	9	22	30390	84315	2622	3628	3500	1545	2333	292	377	228	234	135
mgp7774	4477749	2LM	Mendes 2014	78885433	151054	-11.6833	-55.8358	Tropical wet and dry or savanna	Aw	25.1	1812	15	4.9	70	9	22	37927	110020	3260	4334	4257	1921	2882	442	477	341	378	189
mgp7774	4477755	3LM	Mendes 2014	73154894	140546	-11.6833	-55.8358	Tropical wet and dry or savanna	Aw	25.1	1812	15	4.9	70	9	22	34877	102440	3096	4181	4000	1731	2560	318	407	314	328	221
mgp7774	4477757	4LM	Mendes 2014	75485385	144908	-11.6833	-55.8358	Tropical wet and dry or savanna	Aw	25.1	1812	15	4.9	70	9	22	33041	104850	2710	3872	3737	1614	2378	368	458	297	331	139
mgp7774	4477789	5LM	Mendes 2014	71757836	137109	-11.6833	-55.8358	Tropical wet and dry or savanna	Aw	25.1	1812	15	4.9	70	9	22	31866	95572	2720	3810	3550	1536	2336	316	409	322	297	144
mgp7774	4477790	6LM	Mendes 2014	75459983	144587	-11.6833	-55.8358	Tropical wet and dry or savanna	Aw	25.1	1812	15	4.9	70	9	22	32145	94672	2759	3797	3580	1582	2276	329	368	300	336	145
mgp7774	4478030	7LM	Mendes 2014	75354498	145214	-11.6833	-55.8358	Tropical wet and dry or savanna	Aw	25.1	1812	15	4.9	70	9	22	35038	101190	3019	4140	3874	1721	2699	378	399	318	363	199
mgp7774	4478037	8LM	Mendes 2014	65489369	124076	-11.7413	-56.2533	Tropical wet and dry or savanna	Aw	25.2	1933	15	4.9	70	9	22	29309	85215	2486	3525	3363	1381	2231	303	373	250	284	138
mgp7774	4478934	9LM	Mendes 2014	103182378	113953	-11.7413	-56.2533	Tropical wet and dry or savanna	Aw	25.2	1933	15	4.9	70	9	22	3203	9292	253	377	364	174	266	29	33	37	28	20
mgp12156	4615280	BulkAG1	Mendes 2017	86584758	462103	-22.6667	-48.1667	Humid subtropical	Cfa	20.8	1258	12	5.2	54	14	32	114760	300070	10405	13767	12972	5790	8448	1161	1224	658	978	504
mgp12156	4615281	BulkAG2	Mendes 2017	119318640	601490	-22.6667	-48.1667	Humid subtropical	Cfa	20.8	1258	12	5.2	54	14	32	156960	410700	14545	19182	17551	7951	11535	1733	1681	874	1342	649
mgp12156	4615282	BulkAG3	Mendes 2017	158438846	698886	-22.6667	-48.1667	Humid subtropical	Cfa	20.8	1258	12	5.2	54	14	32	195810	516070	17870	23798	21934	10167	14058	2043	2214	1051	1626	770
mgp12156	4612989	BulkTP1	Mendes 2017	323757692	1453973	-3.26667	-60.2	Tropical rainforest	Af	27.4	2225	24	4.8	48	29	24	366880	966610	33143	42430	42153	18398	26131	4440	4280	2087	3645	1606
mgp12156	4612990	BulkTP2	Mendes 2017	482515714	1993524	-3.26667	-60.2	Tropical rainforest	Af	27.4	2225	24	4.8	48	29	24	529510	1403500	46911	60978	60534	26529	37451	6367	6207	3027	5456	2217
mgp12156	4612991	BulkTP3	Mendes 2017	288274591	1293288	-3.26667	-60.2	Tropical rainforest	Af	27.4	2225	24	4.8	48	29	24	327780	864420	28761	38253	37488	16573	23219	3995	3871	1880	3370	1414
mgp12156	4615218	RAG1	Mendes 2017	224623137	994647	-22.6667	-48.1667	Humid subtropical	Cfa	20.8	1258	12	5.2	54	14	32	276000	723430	25138	32547	31818	13976	19797	2813	3210	1473	2274	1094
mgp12156	4615275	RAG10	Mendes 2017	210639683	943704	-22.6667	-48.1667	Humid subtropical	Cfa	20.8	1258	12	5.2	54	14	32	255430	670110	23366	30793	29175	13216	18285	2620	2708	1453	2110	1032
mgp12156	4615276	RAG11	Mendes 2017	178133705	793923	-22.6667	-48.1667	Humid subtropical	Cfa	20.8	1258	12	5.2	54	14	32	214640	569100	19384	26121	24503	10777	15182	2214	2320	1117	1929	902
mgp12156	4615277	RAG12	Mendes 2017	152045857	719426	-22.6667	-48.1667	Humid subtropical	Cfa	20.8	1258	12	5.2	54	14	32	186060	484680	17070	22871	20985	9418	13573	1937	2118	988	1591	712
mgp12156	4615220	RAG2	Mendes 2017	184799646	884816	-22.6667	-48.1667	Humid subtropical	Cfa	20.8	1258	12	5.2	54	14	32	228670	602370	20743	27867	25800	11706	16384	2495	2495	1268	1916	930
mgp12156	4615241	RAG3	Mendes 2017	241078476	1065596	-22.6667	-48.1667	Humid subtropical	Cfa	20.8	1258	12	5.2	54	14	32	293520	774460	26862	35640	33318	14966	21045	3022	3333	1642	2432	1155
mgp12156	4615243	RAG4	Mendes 2017	212087753	968822	-22.6667	-48.1667	Humid subtropical	Cfa	20.8	1258	12	5.2	54	14	32	259290	679070	23669	31387	29457	13179	18893	2645	2890	1414	2176	1156
mgp12156	4615217	RAG5	Mendes 2017	168424322	784516	-22.6667	-48.1667	Humid subtropical	Cfa	20.8	1258	12	5.2	54	14	32	252230	859490	21355	31734	26378	10348	13773	4518	2653	1651	2679	1773
mgp12156	4620456	RAG5b	Mendes 2017	81018867	394894	-22.6667	-48.1667	Humid subtropical	Cfa	20.8	1258	12	5.2	54	14	32	100880	261130	9198	12258	11344	5182	7452	1025	1212	578	860	424
mgp12156	4615270	RAG6	Mendes 2017	250128856	1083940	-22.6667	-48.1667	Humid subtropical	Cfa	20.8	1258	12	5.2	54	14	32	298650	785520	27043	36660	34027	15219	21730	3073	3333	1650	2489	1155
mgp12156	4615272	RAG7	Mendes 2017	249058646	1080277	-22.6667	-48.1667	Humid subtropical	Cfa	20.8	1258	12	5.2	54	14	32	301920	797280	26892	36483	34423	15322	21671	3216	3357	1786	2642	1268
mgp12156	4615273	RAG8	Mendes 2017	174124328	792431	-22.6667	-48.1667	Humid subtropical	Cfa	20.8	1258	12	5.2	54	14	32	213540	561220	19580	25770	24296	10843	15554	2126	2383	1172	1716	834
mgp12156	4615274	RAG9	Mendes 2017	247609161	1062667	-22.6667	-48.1667	Humid subtropical	Cfa	20.8	1258	12	5.2	54	14	32	297300	784170	26662	35998	34216	15057	21112	3167	3492	1726	2438	1145
mgp12156	4612674	RTP1	Mendes 2017	126509036	648283	-3.26667	-60.2	Tropical rainforest	Af	27.4	2225	24	4.8	48	29	24	152410	392150	14111	17951	17532	7676	10949	1957	1730	851	1515	622
mgp12156	4612902	RTP10	Mendes 2017	189370923	822058	-3.26667	-60.2	Tropical rainforest	Af	27.4	2225	24	4.8	48	29	24	217220	573660	19157	25676	24795	10946	15071	2693	2491	1234	2213	988
mgp12156	4612985	RTP11	Mendes 2017	226005595	1124037	-3.26667	-60.2	Tropical rainforest	Af	27.4	2225	24	4.8	48	29	24	270040	700140	24176	32023	31068	13569	19399	3264	3311	1497	2767	1117
mgp12156	4612986	RTP12	Mendes 2017	95724666	485804	-3.26667	-60.2	Tropical rainforest	Af	27.4	2225	24	4.8	48	29	24	118330	309900	10825	13997	13387	5774	8388	1412	1520	733	1176	469
mgp12156	4612675	RTP2	Mendes 2017	252356997	1093748	-3.26667	-60.2	Tropical rainforest	Af	27.4	2225	24	4.8	48	29	24	292390	773980	26121	34245	33244	14646	20881	3525	3486	1705	2986	1268
mgp12156	4612676	RTP3	Mendes 2017	55537782	290957	-3.26667	-60.2	Tropical rainforest	Af	27.4	2225	24	4.8	48	29	24	67349	173480	6185	7911	7631	3321	4993	804	807	365	731	305
mgp12156	4612677	RTP4	Mendes 2017	195881569	953167	-3.26667	-60.2	Tropical rainforest	Af	27.4	2225	24	4.8	48	29	24	232580	608460	20620	27071	26694	11418	16709	2825	2739	1426	2431	1064
mgp12156	4612679	RTP5	Mendes 2017	217088770	1035679	-3.26667	-60.2	Tropical rainforest	Af	27.4	2225	24	4.8	48	29	24	255340	669130	22539	29707	29469	12903	18724	3016	2998	1603	2587	1125
mgp12156	4612898	RTP6	Mendes 2017	83017588	398264	-3.26667	-60.2	Tropical rainforest	Af	27.4	2225	24	4.8	48	29	24	97133	254580	8777	11416	11102	4900	7051	1205	1157	564	941	415
mgp12156	4612899	RTP7	Mendes 2017	222051443	1033077	-3.26667	-60.2	Tropical rainforest	Af	27.4	2225	24	4.8	48	29	24	259870	676490	23142	30499	29898	13059	18705	3019	3080	1502	2530	1099
mgp12156	4612900	RTP8	Mendes 2017	96905238	487960	-3.26667	-60.2	Tropical rainforest	Af	27.4	2225	24	4.8	48	29	24	115320	299310	10574	13558	13139	5752	8616	1350	1379	691	1140	456
mgp12156	4612901	RTP9	Mendes 2017	87275720	418750	-3.26667	-60.2	Tropical rainforest	Af	27.4	2225	24	4.8	48	29	24	102950	268080	9386	11986	11800	5187	7555	1197	1176	591	980	428
mgp1519	4497370	10LSa	Mendes 2015	1452524300	15521548	-11.6833	-55.8358	Tropical wet and dry or savanna	Aw	25.1	1812	15	4.9	70	9	22	758930	1509900	71781	107010	80986	31939	94459	10465	11004	6636	7106	1805
mgp1519	4497371	10LSb	Mendes 2015	1585023687	16901918	-11.6833	-55.8358	Tropical wet and dry or savanna	Aw	25.1	1812	15	4.9	70	9	22	799630	1552400	76819	109380	83749	31968	105150	11226	11255	6761	7086	1650
mgp1519	4497372	11LSa	Mendes 2015	1641076813	17445400	-11.7145	-55.7931	Tropical wet and dry or savanna	Aw	25.2	1766	15	4.9	70	9	22	737270	1467900	69069	102100	81275	29748	91680	9888	10685	6525	6227	1695
mgp1519	4497373	11LSb	Mendes 2015	1958519064	20851107	-11.7145	-55.7931	Tropical wet and dry or savanna	Aw	25.2	1766	15	4.9	70	9	22	827190	1608300	76309	118740	89878	33920	104370	11128	11665	7845	6805	1605
mgp1519	4497374	12LSb	Mendes 2015	1440853866	15240438	-11.7145	-55.7931	Tropical wet and dry or savanna	Aw	25.2	1766	15	4.9	70	9	22	609320	1226600	55865	86605	64284	25145	74608	8176	8902	5267	5617	1387
mgp1519	4497375	13LSa	Mendes 2015	1938015010	20635352	-11.7145	-55.7931	Tropical wet and dry or savanna	Aw	25.2	1766	15	4.9	70	9	22	716370	1430000	65268	102920	76710	28194	96897	9520	9738	5641	5879	1472
mgp1519	4497376	13LSb	Mendes 2015	1420896267	15155481	-11.7145	-55.7931	Tropical wet and dry or savanna	Aw	25.2	1766	15	4.9	70	9	22	678020	1351800	63911	95235	72356	27518	85778	8786	9211	5794	5929	1686
mgp1519	4497377	14LSa	Mendes 2015	1994863535	21256135	-11.7145	-55.7931	Tropical wet and dry or savanna	Aw	25.2	1766	15	4.9	70	9	22	931370	1820000	86637	132390	99834	37445	116310	12262	13249	8444	8736	1864
mgp1519	4497378	14LSb	Mendes 2015	1305482377	13926576	-11.7145	-55.7931	Tropical wet and dry or savanna	Aw	25.2	1766	15	4.9	70	9	22	402250	830930	38435	53486	43264	16340	47585	5384	5927	3869	4228	868
mgp1519	4497379	15LSa	Mendes 2015	2281777227	24375188	-11.7416	-56.2624	Tropical wet and dry or savanna	Aw	25.2	1933	15	4.9	70	9	22	967530	1853600	88899	136290	107310	40357	116200	14854	14994	9277	9302	2328
mgp1519	4497380	15LSb	Mendes 2015	1529424461	16303010	-11.7416	-56.2624	Tropical wet and dry or savanna	Aw	25.2	1933	15	4.9	70	9	22	677220	1336700	62326	92530	74494	28643	79516	10755	10779	6556	6913	1292
mgp1519	4497381	16LSa	Mendes 2015	1842131597	19634073	-11.7416	-56.2624	Tropical wet and dry or savanna	Aw	25.2	1933	15	4.9	70	9	22	819700	1604300	75871	116170	89544	34289	96327	12703	12239	8163	9084	1635
mgp1519	4497382	16LSb	Mendes 2015	1623856791	17298270	-11.7416	-56.2624	Tropical wet and dry or savanna	Aw	25.2	1933	15	4.9	70	9	22	741910	1461800	69309	104100	80858	31122	87029	10170	11832	7617	7176	1729
mgp1519	4497383	17LSa	Mendes 2015	1592168131	16954685	-11.7416	-56.2624	Tropical wet and dry or savanna	Aw	25.2	1933	15	4.9	70	9	22	704930	1386900	64791	98199	78514	28837	82958	10245	10974	7662	7302	1465
mgp1519	4497384	17LSb	Mendes 2015	1603768269	17133206	-11.7416	-56.2624	Tropical wet and dry or savanna	Aw	25.2	1933	15	4.9	70	9	22	742830	1450800	69300	103930	82223	29753	86523	11556	11572	6622	7786	1651
mgp1519	4497385	18LSa	Mendes 2015	1833433977	19529714	-11.7416	-56.2624	Tropical wet and dry or savanna	Aw	25.2	1933	15	4.9	70	9	22	897540	1739100	83983	125310	97116	36894	108210	13164	13589	7984	9889	1994
mgp1519	4497386	18LSb	Mendes 2015	1439335287	15342158	-11.7416	-56.2624	Tropical wet and dry or savanna	Aw	25.2	1933	15	4.9	70	9	22	743650	1460800	70081	102480	83542	31579	86210	11281	11395	6597	7799	1518
mgp1519	4497387	19LSa	Mendes 2015	1762026012	18901443	-11.7413	-56.2533	Tropical wet and dry or savanna	Aw	25.2	1933	15	4.9	70	9	22	887310	1726600	81754	123510	97004	37325	112280	12065	12534	6969	7589	1592
mgp1519	4497388	19LSb	Mendes 2015	1338341598	14368635	-11.7413	-56.2533	Tropical wet and dry or savanna	Aw	25.2	1933	15	4.9	70	9	22	682430	1354500	62967	94713	72421	28908	88739	8013	9129	5430	5291	1320
mgp1519	4497389	1LSa	Mendes 2015	1535671061	16373863	-11.6824	-55.8351	Tropical wet and dry or savanna	Aw	25.1	1812	15	4.9	70	9	22	725200	1425900	66109	100910	79403	29481	83642	9556	11648	7001	7409	1423
mgp1519	4497390	1LSb	Mendes 2015	1917707251	20423704	-11.6824	-55.8351	Tropical wet and dry or savanna	Aw	25.1	1812	15	4.9	70	9	22	722660	1421000	66279	102820	79130	29641	83318	10156	11310	7697	7728	1458
mgp1519	4497391	20LSa	Mendes 2015	2339288507	25021054	-11.7413	-56.2533	Tropical wet and dry or savanna	Aw	25.2	1933	15	4.9	70	9	22	1109000	2110200	105430	153740	118140	44368	148630	16097	15534	9052	9562	2087
mgp1519	4497392	20LSb	Mendes 2015	1253546383	13402895	-11.7413	-56.2533	Tropical wet and dry or savanna	Aw	25.2	1933	15	4.9	70	9	22	586780	1178900	55441	81395	61876	24316	74583	8230	8598	4565	5165	1447
mgp1519	4497393	21LSa	Mendes 2015	1841976159	19818763	-11.7413	-56.2533	Tropical wet and dry or savanna	Aw	25.2	1933	15	4.9	70	9	22	899530	1711600	85742	126100	95635	36709	121540	12602	12324	6128	6891	1698
mgp1519	4497394	21LSb	Mendes 2015	1494681282	15951446	-11.7413	-56.2533	Tropical wet and dry or savanna	Aw	25.2	1933	15	4.9	70	9	22	776060	1503300	71629	107750	83642	30995	100050	10636	11872	6615	6553	1485
mgp1519	4497395	22LSa	Mendes 2015	1442975076	15428263	-11.7413	-56.2533	Tropical wet and dry or savanna	Aw	25.2	1933	15	4.9	70	9	22	849580	1662800	82482	114750	90387	34155	109250	11776	11858	6258	7428	1933
mgp1519	4497396	22LSb	Mendes 2015	2759962619	29499368	-11.7413	-56.2533	Tropical wet and dry or savanna	Aw	25.2	1933	15	4.9	70	9	22	1253900	2328000	120560	176380	127840	47406	176490	18455	17673	10002	9791	1899
mgp1519	4497397	2LSa	Mendes 2015	1717616735	18337617	-11.6824	-55.8351	Tropical wet and dry or savanna	Aw	25.1	1812	15	4.9	70	9	22	755580	1481500	67897	107100	81832	29429	88296	10665	11659	7860	8192	1629
mgp1519	4497398	2LSb	Mendes 2015	1368742061	14554642	-11.6824	-55.8351	Tropical wet and dry or savanna	Aw	25.1	1812	15	4.9	70	9	22	625160	1233900	57065	89014	67019	25101	72304	9157	9224	6429	6379	1337
mgp1519	4497399	3LSa	Mendes 2015	2091680663	22245990	-11.6824	-55.8351	Tropical wet and dry or savanna	Aw	25.1	1812	15	4.9	70	9	22	858760	1684300	78150	120830	93859	34130	100370	11297	13026	8783	8699	1624
mgp1519	4497400	3LSb	Mendes 2015	1652011068	17618750	-11.6824	-55.8351	Tropical wet and dry or savanna	Aw	25.1	1812	15	4.9	70	9	22	790170	1542000	74991	109150	86019	31470	90536	11721	12466	8644	8667	1626
mgp1519	4497401	4LSa	Mendes 2015	1232841286	13127073	-11.6824	-55.8351	Tropical wet and dry or savanna	Aw	25.1	1812	15	4.9	70	9	22	563610	1126200	50380	79916	61110	22838	65539	7451	8346	5371	6091	1108
mgp1519	4497402	4LSb	Mendes 2015	1567594935	16687613	-11.6824	-55.8351	Tropical wet and dry or savanna	Aw	25.1	1812	15	4.9	70	9	22	720430	1406300	65269	100420	80180	29309	85560	9379	11045	7285	7323	1603
mgp1519	4497403	5LSa	Mendes 2015	980702897	10477278	-11.6822	-55.0089	Tropical wet and dry or savanna	Aw	25	1895	15	4.9	70	9	22	473270	962150	42819	67756	50904	19759	57885	6126	6457	4912	4028	1100
mgp1519	4497404	5LSb	Mendes 2015	1661893955	17817773	-11.6822	-55.0089	Tropical wet and dry or savanna	Aw	25	1895	15	4.9	70	9	22	766690	1496800	68450	111660	83934	30965	98374	9307	11107	8631	6291	1600
mgp1519	4497405	6LSa	Mendes 2015	1349881717	14427611	-11.6822	-55.0089	Tropical wet and dry or savanna	Aw	25	1895	15	4.9	70	9	22	630600	1305000	57620	88812	68467	26273	78736	8317	8844	6180	6144	1642
mgp1519	4497406	6LSb	Mendes 2015	1835174499	19593526	-11.6822	-55.0089	Tropical wet and dry or savanna	Aw	25	1895	15	4.9	70	9	22	777690	1526900	70533	113910	83680	32137	98271	10704	11362	7731	6694	1468
mgp1519	4497407	7LSa	Mendes 2015	1691682287	18119871	-11.6833	-55.8358	Tropical wet and dry or savanna	Aw	25.1	1812	15	4.9	70	9	22	834340	1617200	78669	118590	89556	32498	108040	11505	12485	8102	7551	1756
mgp1519	4497408	7LSb	Mendes 2015	2985513423	31966967	-11.6833	-55.8358	Tropical wet and dry or savanna	Aw	25.1	1812	15	4.9	70	9	22	1164700	2201900	108430	166580	120590	45449	159150	16601	17827	11707	9408	2061
mgp1519	4497409	8LSa	Mendes 2015	1449085730	15455238	-11.6833	-55.8358	Tropical wet and dry or savanna	Aw	25.1	1812	15	4.9	70	9	22	651240	1294000	61467	89622	68170	25769	83946	9575	9322	6306	5953	1403
mgp1519	4497410	8LSb	Mendes 2015	2340921723	25017093	-11.6833	-55.8358	Tropical wet and dry or savanna	Aw	25.1	1812	15	4.9	70	9	22	980570	1884900	93092	141510	100760	37533	129900	14453	14049	9843	8417	2042
mgp1519	4497411	9LSa	Mendes 2015	1297860799	13908400	-11.6833	-55.8358	Tropical wet and dry or savanna	Aw	25.1	1812	15	4.9	70	9	22	659080	1302800	62181	89853	68443	26688	85826	9065	9679	5629	5859	1323
mgp1519	4497412	9LSb	Mendes 2015	2224899417	23867305	-11.6833	-55.8358	Tropical wet and dry or savanna	Aw	25.1	1812	15	4.9	70	9	22	1032200	1983300	97063	147700	109250	41298	135500	14672	15678	10811	9058	1987
mgp12953	4622702	H1S3	Meneghine 2017	2969248149	31764931	-23.5797	-47.5867	Humid subtropical	Cfa	18.9	1150	12	5.2	54	14	32	3469900	8391000	326330	428840	382350	153920	301050	47397	42579	19358	32656	14168
mgp12953	4622703	H2S1	Meneghine 2017	4163450321	44539294	-23.5797	-47.5867	Humid subtropical	Cfa	18.9	1150	12	5.2	54	14	32	4313500	10437000	398490	531280	473890	189750	376840	58002	53540	25408	40703	17156
mgp12953	4622704	H3S1	Meneghine 2017	2161027347	23164262	-23.5797	-47.5867	Humid subtropical	Cfa	18.9	1150	12	5.2	54	14	32	2134700	5170500	196420	262410	235510	93388	185540	28825	26399	12693	20190	8644
mgp3731	4530393	Forest_A001_1_split_1	Meyer 2017	16335764619	98185139	-10.1681	-62.8242	Tropical wet and dry or savanna	Aw	25	2081	21	4.6	60	19	21	12269000	33680000	1062900	1429300	1342500	588170	950710	152600	152660	94093	139900	39880
mgp3731	4535541	Forest_A001_2_split_1	Meyer 2017	16184171205	96165003	-10.1681	-62.8242	Tropical wet and dry or savanna	Aw	25	2081	21	4.6	60	19	21	11338000	32018000	976020	1288700	1256700	559320	858070	140040	139680	86304	126730	42136
mgp3731	4535545	Forest_A01_1_split_1	Meyer 2017	16499910405	100776121	-10.1681	-62.8242	Tropical wet and dry or savanna	Aw	25	2081	21	4.6	60	19	21	10354000	29059000	903580	1181500	1142100	495110	814570	127220	130740	76855	113840	38402
mgp3731	4535560	Forest_A01_2_split_1	Meyer 2017	16468726157	100377612	-10.1681	-62.8242	Tropical wet and dry or savanna	Aw	25	2081	21	4.6	60	19	21	10500000	29383000	918500	1202600	1157800	503050	828100	129050	132440	77524	114120	39015
mgp3731	4535559	Forest_A1_1_split_1	Meyer 2017	15790025427	87821959	-10.1681	-62.8242	Tropical wet and dry or savanna	Aw	25	2081	21	4.6	60	19	21	12713000	34447000	1070900	1437000	1409100	612630	901720	155040	151660	88709	145980	49161
mgp3731	4536768	Forest_A1_2_split_1	Meyer 2017	14685329089	71157224	-10.1681	-62.8242	Tropical wet and dry or savanna	Aw	25	2081	21	4.6	60	19	21	12503000	36427000	1075300	1399500	1393400	635800	911470	145260	149800	89092	134000	46380
mgp3731	4535539	Forest_A10_1_split_1	Meyer 2017	16938597086	105134940	-10.1681	-62.8242	Tropical wet and dry or savanna	Aw	25	2081	21	4.6	60	19	21	8852200	24227000	777660	1017600	975960	414410	726210	102660	114790	66064	90211	35235
mgp3731	4535553	Forest_A10_2_split_1	Meyer 2017	16719488533	102022509	-10.1681	-62.8242	Tropical wet and dry or savanna	Aw	25	2081	21	4.6	60	19	21	9001500	24911000	792820	1031700	997480	425900	729390	103150	117100	67388	91147	36804
mgp3731	4546395	Forest_A10_3_split_1	Meyer 2017	17999861638	119986013	-10.1681	-62.8242	Tropical wet and dry or savanna	Aw	25	2081	21	4.6	60	19	21	18186000	47996000	1560300	2065000	2017200	866020	1335400	226110	224130	134920	204120	73297
mgp3731	4536139	Forest_A100_1_split_1	Meyer 2017	17631239942	114603805	-10.1681	-62.8242	Tropical wet and dry or savanna	Aw	25	2081	21	4.6	60	19	21	10641000	28617000	932190	1249800	1172300	509690	860290	136200	134110	85589	118720	36599
mgp3731	4546394	Forest_A100_2_split_1	Meyer 2017	17058292904	105950943	-10.1681	-62.8242	Tropical wet and dry or savanna	Aw	25	2081	21	4.6	60	19	21	12249000	32331000	1044700	1416400	1352200	580850	902630	158480	149910	92819	141150	46761
mgp3731	4537210	Pasture_A001_1_split_1	Meyer 2017	14733358729	79572931	-10.1681	-62.8242	Tropical wet and dry or savanna	Aw	25	2081	21	4.6	60	19	21	10800000	30495000	960200	1300700	1184600	520770	827940	128380	127730	73460	108230	40528
mgp3731	4536464	Pasture_A001_2_split_1	Meyer 2017	14779368877	80224980	-10.1681	-62.8242	Tropical wet and dry or savanna	Aw	25	2081	21	4.6	60	19	21	11202000	31622000	995570	1349600	1230800	540850	856400	132440	131940	76248	112680	42136
mgp3731	4546658	Pasture_A01_1_split_1	Meyer 2017	16712984445	101741019	-10.1681	-62.8242	Tropical wet and dry or savanna	Aw	25	2081	21	4.6	60	19	21	13179000	34608000	1166100	1610000	1435400	601880	997790	165390	156100	90565	142200	51518
mgp3731	4536477	Pasture_A01_2_split_1	Meyer 2017	16793645730	102976326	-10.1681	-62.8242	Tropical wet and dry or savanna	Aw	25	2081	21	4.6	60	19	21	6492700	17633000	591590	800010	704720	304610	523170	79972	78304	45892	67438	23405
mgp3731	4537330	Pasture_A1_1_split_1	Meyer 2017	16849928413	104390923	-10.1681	-62.8242	Tropical wet and dry or savanna	Aw	25	2081	21	4.6	60	19	21	13367000	35860000	1236100	1646800	1463900	629200	1084700	165120	160050	90660	132650	49513
mgp3731	4545668	Pasture_A1_2_split_1	Meyer 2017	17090468370	107708580	-10.1681	-62.8242	Tropical wet and dry or savanna	Aw	25	2081	21	4.6	60	19	21	14162000	36373000	1286100	1744800	1550900	647800	1109200	179930	167210	93641	146140	54902
mgp3731	4537326	Pasture_A10_1_split_1	Meyer 2017	16540649794	101445480	-10.1681	-62.8242	Tropical wet and dry or savanna	Aw	25	2081	21	4.6	60	19	21	12545000	34332000	1156300	1538700	1376900	600050	1003600	151710	150240	85631	126650	46689
mgp3731	4537328	Pasture_A10_2_split_1	Meyer 2017	17000473297	107469820	-10.1681	-62.8242	Tropical wet and dry or savanna	Aw	25	2081	21	4.6	60	19	21	12325000	33462000	1143900	1525400	1354900	586330	1004800	151710	149480	85502	124600	44694
mgp3731	4537324	Pasture_A100_1_split_1	Meyer 2017	16099183251	89884388	-10.1681	-62.8242	Tropical wet and dry or savanna	Aw	25	2081	21	4.6	60	19	21	12448000	34525000	1128600	1508600	1379600	607770	968950	155590	148080	83914	125770	46218
mgp3731	4536577	Pasture_A100_2_split_1	Meyer 2017	16032528789	88815333	-10.1681	-62.8242	Tropical wet and dry or savanna	Aw	25	2081	21	4.6	60	19	21	12284000	34171000	1113600	1483100	1363800	601350	953320	155040	146160	82474	123270	46287
mgp11261	4597439	GMP_001_A1	Miura 2016	145695467	713843	-4.55858	105.407	Tropical rainforest	Af	27	2542	95	5.1	24	29	47	133840	354440	11735	15748	14769	6183	10000	1609	1612	963	1325	581
mgp11261	4597448	GMP_001_C4	Miura 2016	153583796	795066	-4.55858	105.407	Tropical rainforest	Af	27	2542	95	5.1	24	29	47	150870	390540	13617	17536	16989	6869	11532	1898	1853	944	1359	826
mgp11261	4597438	GMP_002_B1	Miura 2016	262122963	1270366	-4.55858	105.407	Tropical rainforest	Af	27	2542	95	5.1	24	29	47	237590	626820	20846	28398	26318	11242	18206	2633	2796	1637	2227	970
mgp11261	4597449	GMP_003_C1	Miura 2016	259021467	1405455	-4.55858	105.407	Tropical rainforest	Af	27	2542	95	5.1	24	29	47	271210	704200	24222	32716	30570	12684	21018	3214	3131	1680	2436	1194
mgp11261	4597441	GMP_004_D1	Miura 2016	102507103	564351	-4.55858	105.407	Tropical rainforest	Af	27	2542	95	5.1	24	29	47	114760	299680	10458	14044	12601	5411	8466	1346	1339	789	1123	578
mgp11261	4597445	GMP_005_A2	Miura 2016	235654305	1148813	-4.55858	105.407	Tropical rainforest	Af	27	2542	95	5.1	24	29	47	201690	538640	17679	23640	22340	9366	15248	2245	2391	1322	1907	906
mgp11261	4597446	GMP_006_B2	Miura 2016	206972775	1050789	-4.55858	105.407	Tropical rainforest	Af	27	2542	95	5.1	24	29	47	166110	444090	14601	20021	18343	7671	12792	1816	1918	1120	1501	701
mgp11261	4597437	GMP_007_C2	Miura 2016	184262421	999010	-4.55858	105.407	Tropical rainforest	Af	27	2542	95	5.1	24	29	47	156350	410440	13813	18433	17177	7070	12109	1795	1827	1023	1493	680
mgp11261	4597447	GMP_008_D2	Miura 2016	200269756	1123082	-4.55858	105.407	Tropical rainforest	Af	27	2542	95	5.1	24	29	47	182200	472410	15701	20885	20411	8438	14483	1893	2137	1172	1625	671
mgp11261	4597435	GMP_009_A3	Miura 2016	294060502	1404353	-4.55858	105.407	Tropical rainforest	Af	27	2542	95	5.1	24	29	47	234870	639070	20125	27882	25481	10267	17128	2561	2859	1627	2281	1019
mgp11261	4597443	GMP_010_B3	Miura 2016	130906936	652648	-4.55858	105.407	Tropical rainforest	Af	27	2542	95	5.1	24	29	47	118280	309620	10596	14727	13072	5669	8919	1246	1311	823	994	391
mgp11261	4597434	GMP_011_C3	Miura 2016	172252285	898866	-4.55858	105.407	Tropical rainforest	Af	27	2542	95	5.1	24	29	47	140300	373010	12567	16484	15571	6216	10739	1715	1626	924	1388	709
mgp11261	4597436	GMP_012_D3	Miura 2016	196889323	989291	-4.55858	105.407	Tropical rainforest	Af	27	2542	95	5.1	24	29	47	174380	459300	15255	20179	19332	8309	13188	2040	2127	1192	1723	851
mgp11261	4597440	GMP_013_A4	Miura 2016	327237058	1567417	-4.55858	105.407	Tropical rainforest	Af	27	2542	95	5.1	24	29	47	280130	751340	24882	33027	30773	12711	20926	3245	3381	1837	2745	1416
mgp11261	4597444	GMP_014_B4	Miura 2016	214821518	1045866	-4.55858	105.407	Tropical rainforest	Af	27	2542	95	5.1	24	29	47	176230	462070	15598	20908	19752	8181	13704	1939	2101	1117	1568	691
mgp11261	4597442	GMP_016_D4	Miura 2016	233895479	1126156	-4.55858	105.407	Tropical rainforest	Af	27	2542	95	5.1	24	29	47	189520	501220	16385	21638	21477	8711	13967	2232	2337	1349	1860	968
mgp837	4493650	DS_2A	Navarrete 2015	2253115473	23319588	-14.3272	-54.3742	Tropical wet and dry or savanna	Aw	23.6	1682	15	5.3	62	16	22	1316900	2582500	123990	179650	147630	55176	154400	18823	19432	13824	13112	2915
mgp837	4493651	DS_2C	Navarrete 2015	984956429	10101224	-14.3272	-54.3736	Tropical wet and dry or savanna	Aw	23.6	1682	15	5.3	62	16	22	635990	1330200	58212	87215	71222	28098	67309	8896	8755	6715	6314	1518
mgp837	4493652	DS_2E	Navarrete 2015	2297811383	23648292	-14.3272	-54.3747	Tropical wet and dry or savanna	Aw	23.6	1682	15	5.3	62	16	22	1227400	2414600	114250	167160	135010	51059	143730	15996	17974	12622	11712	2533
mgp837	4493653	DS_3A	Navarrete 2015	3602706792	37017180	-13.3825	-54.94	Tropical wet and dry or savanna	Aw	24.2	1757	15	4.9	70	9	22	1716600	3293100	155570	252880	186120	70296	213580	22264	23819	19465	14833	3065
mgp837	4493654	DS_3C	Navarrete 2015	2209118929	22858762	-13.3825	-54.9394	Tropical wet and dry or savanna	Aw	24.2	1757	15	4.9	70	9	22	1021500	2009800	91927	149980	111780	42532	127850	12286	14146	11281	7960	1896
mgp837	4493655	DS_3E	Navarrete 2015	2997747324	30848080	-13.3825	-54.9406	Tropical wet and dry or savanna	Aw	24.2	1757	15	4.9	70	9	22	995010	1951300	87240	148220	108060	40262	128030	12549	13750	11962	7638	1440
mgp837	4493649	FS_1A	Navarrete 2015	2536664461	26022580	-15.1958	-54.0586	Tropical wet and dry or savanna	Aw	22.3	1841	25	5.3	55	17	28	1450900	2932100	135010	197390	163620	62127	152240	22633	22076	15604	16679	3191
mgp837	4493544	FS_1C	Navarrete 2015	2725848472	27945536	-15.1958	-54.0581	Tropical wet and dry or savanna	Aw	22.3	1841	25	5.3	55	17	28	1486000	2976800	137680	201700	166920	63871	163350	21402	22749	16628	15313	3163
mgp837	4493545	FS_1E	Navarrete 2015	2772651355	28432282	-15.1958	-54.0592	Tropical wet and dry or savanna	Aw	22.3	1841	25	5.3	55	17	28	1483400	2971200	139030	200930	169710	64473	162470	22652	22417	16210	16327	3176
mgp837	4493892	FS_2A	Navarrete 2015	7041966249	72049364	-14.3606	-54.3575	Tropical wet and dry or savanna	Aw	23.6	1744	15	5.3	62	16	22	1509400	13526000	121920	163360	126310	57728	310490	13041	18158	12095	10542	2451
mgp837	4493546	FS_2C	Navarrete 2015	1033654661	11083752	-14.3606	-54.3569	Tropical wet and dry or savanna	Aw	23.6	1744	15	5.3	62	16	22	516840	1043200	48272	71022	57521	21867	57166	7522	7773	5201	5015	1323
mgp837	4493893	FS_2E	Navarrete 2015	5980079018	61788986	-14.3606	-54.3581	Tropical wet and dry or savanna	Aw	23.6	1744	15	5.3	62	16	22	1806600	11883000	156180	216170	170910	71947	319230	20653	22896	15445	12022	2825
mgp837	4493547	FS_3A	Navarrete 2015	2321564826	23872968	-13.3658	-54.9067	Tropical wet and dry or savanna	Aw	24.2	1757	15	4.9	70	9	22	1177800	2324400	110850	162410	130910	47670	138470	14300	18124	13129	9696	2003
mgp837	4493548	FS_3C	Navarrete 2015	2780516789	30062278	-13.3658	-54.9061	Tropical wet and dry or savanna	Aw	24.2	1757	15	4.9	70	9	22	1207600	2347500	112700	168190	133180	49024	149520	16846	17914	11958	11195	2696
mgp837	4493549	FS_3E	Navarrete 2015	2735803610	27957742	-13.3658	-54.9072	Tropical wet and dry or savanna	Aw	24.2	1757	15	4.9	70	9	22	1463700	2925500	134560	202940	163940	59265	167580	18846	23535	16033	14676	3167
mgp10854	4582104	T0V4a	Navarrete 2015	49094133	196990	-22.41	-47.38	Humid subtropical	Cfa	20	1317	12	5.2	54	14	32	49261	127570	4443	5898	5650	2494	3682	575	607	290	435	209
mgp10854	4582105	T0V4b	Navarrete 2015	43089324	173507	-22.41	-47.38	Humid subtropical	Cfa	20	1317	12	5.2	54	14	32	43849	114050	4084	5126	4955	2264	3265	540	497	247	390	161
mgp10854	4582106	T0V4c	Navarrete 2015	63759972	252223	-22.41	-47.38	Humid subtropical	Cfa	20	1317	12	5.2	54	14	32	64721	167500	5838	7967	7420	3244	4459	808	734	339	545	263
mgp10854	4582107	T157V1	Navarrete 2015	156821373	601075	-22.41	-47.38	Humid subtropical	Cfa	20	1317	12	5.2	54	14	32	154590	401560	14490	18613	17923	8057	10808	1673	1845	903	1341	608
mgp10854	4582108	T157V10	Navarrete 2015	214844156	808603	-22.41	-47.38	Humid subtropical	Cfa	20	1317	12	5.2	54	14	32	211750	555770	19458	25264	24412	10711	14967	2469	2561	1247	1900	900
mgp10854	4582109	T157V11	Navarrete 2015	89892936	343369	-22.41	-47.38	Humid subtropical	Cfa	20	1317	12	5.2	54	14	32	91790	238140	8520	10895	10355	4525	6800	952	1133	523	822	366
mgp10854	4582110	T157V13	Navarrete 2015	130888890	489532	-22.41	-47.38	Humid subtropical	Cfa	20	1317	12	5.2	54	14	32	127340	335800	11768	14984	14420	6460	9218	1384	1544	643	1165	560
mgp10854	4582111	T157V14	Navarrete 2015	86067528	339951	-22.41	-47.38	Humid subtropical	Cfa	20	1317	12	5.2	54	14	32	85084	225570	7904	10101	9565	4339	6160	1009	943	513	794	385
mgp10854	4582112	T157V15	Navarrete 2015	92769021	350530	-22.41	-47.38	Humid subtropical	Cfa	20	1317	12	5.2	54	14	32	89803	235690	8012	10792	10174	4398	6472	1005	1087	516	821	387
mgp10854	4582113	T157V18	Navarrete 2015	79998187	295302	-22.41	-47.38	Humid subtropical	Cfa	20	1317	12	5.2	54	14	32	85556	227100	7622	10298	9625	4301	6000	962	963	518	774	420
mgp10854	4582114	T157V19	Navarrete 2015	52357824	194678	-22.41	-47.38	Humid subtropical	Cfa	20	1317	12	5.2	54	14	32	55765	147510	5096	6813	6248	2804	3947	683	643	309	496	275
mgp10854	4582115	T157V2	Navarrete 2015	35201469	138190	-22.41	-47.38	Humid subtropical	Cfa	20	1317	12	5.2	54	14	32	34216	89471	3047	4069	3857	1783	2644	401	458	198	322	149
mgp10854	4582116	T157V20	Navarrete 2015	205150663	912493	-22.41	-47.38	Humid subtropical	Cfa	20	1317	12	5.2	54	14	32	247220	652490	22879	30494	27774	12613	16858	2790	2803	1437	2384	1348
mgp10854	4582117	T157V22	Navarrete 2015	122410720	554451	-22.41	-47.38	Humid subtropical	Cfa	20	1317	12	5.2	54	14	32	155990	401990	14334	19058	17789	7671	11210	1653	1811	908	1350	861
mgp10854	4582118	T157V23	Navarrete 2015	96898703	447980	-22.41	-47.38	Humid subtropical	Cfa	20	1317	12	5.2	54	14	32	114190	298860	10311	13696	12953	5632	8228	1308	1293	636	1028	582
mgp10854	4582119	T157V24	Navarrete 2015	128564285	537684	-22.41	-47.38	Humid subtropical	Cfa	20	1317	12	5.2	54	14	32	155170	419880	13799	19760	16998	7771	10618	1674	1684	876	1452	889
mgp10854	4582120	T157V3	Navarrete 2015	41812511	163018	-22.41	-47.38	Humid subtropical	Cfa	20	1317	12	5.2	54	14	32	41055	107620	3727	4969	4606	2073	2940	486	418	242	401	174
mgp10854	4582121	T157V5	Navarrete 2015	35630906	137828	-22.41	-47.38	Humid subtropical	Cfa	20	1317	12	5.2	54	14	32	33254	88135	2912	3929	3773	1651	2490	399	381	192	289	155
mgp10854	4582122	T157V6	Navarrete 2015	37517394	150725	-22.41	-47.38	Humid subtropical	Cfa	20	1317	12	5.2	54	14	32	39402	102860	3673	4648	4355	1989	2664	493	468	238	322	336
mgp10854	4582123	T157V7	Navarrete 2015	97546246	372361	-22.41	-47.38	Humid subtropical	Cfa	20	1317	12	5.2	54	14	32	93342	245940	8595	10825	10640	4669	7011	1119	1037	545	861	405
mgp10854	4582124	T157V9	Navarrete 2015	126768250	480630	-22.41	-47.38	Humid subtropical	Cfa	20	1317	12	5.2	54	14	32	124480	327020	11212	14735	14064	6357	8984	1499	1510	676	1154	554
mgp10854	4582125	T217V1	Navarrete 2015	157582145	586856	-22.41	-47.38	Humid subtropical	Cfa	20	1317	12	5.2	54	14	32	152750	399980	14301	18386	17355	7947	11026	1637	1785	827	1316	617
mgp10854	4582126	T217V10	Navarrete 2015	157537137	619326	-22.41	-47.38	Humid subtropical	Cfa	20	1317	12	5.2	54	14	32	161840	424040	14886	19495	18777	8674	11361	1716	1945	911	1434	637
mgp10854	4582127	T217V11	Navarrete 2015	91391385	349119	-22.41	-47.38	Humid subtropical	Cfa	20	1317	12	5.2	54	14	32	95553	247730	8944	11353	10949	4880	6793	978	1079	530	817	459
mgp10854	4582128	T217V13	Navarrete 2015	198242156	790759	-22.41	-47.38	Humid subtropical	Cfa	20	1317	12	5.2	54	14	32	200590	527900	18371	24277	22730	10125	14390	2335	2276	1213	1681	868
mgp10854	4582129	T217V14	Navarrete 2015	119230868	445603	-22.41	-47.38	Humid subtropical	Cfa	20	1317	12	5.2	54	14	32	116870	307430	10668	13735	13202	5979	8223	1351	1357	643	1053	471
mgp10854	4582130	T217V15	Navarrete 2015	91290010	333588	-22.41	-47.38	Humid subtropical	Cfa	20	1317	12	5.2	54	14	32	92688	242250	8418	10897	10792	4668	6549	1056	1061	546	812	442
mgp10854	4582131	T217V18	Navarrete 2015	69071883	249792	-22.41	-47.38	Humid subtropical	Cfa	20	1317	12	5.2	54	14	32	81987	209480	7275	9626	9472	4204	5737	786	972	476	705	515
mgp10854	4582132	T217V19	Navarrete 2015	117971632	451569	-22.41	-47.38	Humid subtropical	Cfa	20	1317	12	5.2	54	14	32	130490	335190	11998	15399	15017	6642	9296	1368	1618	798	1178	718
mgp10854	4582133	T217V2	Navarrete 2015	96385109	379678	-22.41	-47.38	Humid subtropical	Cfa	20	1317	12	5.2	54	14	32	97615	252840	9272	11656	11012	5054	7170	1077	1192	564	865	406
mgp10854	4582134	T217V20	Navarrete 2015	145809468	558384	-22.41	-47.38	Humid subtropical	Cfa	20	1317	12	5.2	54	14	32	162590	418520	14901	19026	18530	8122	11417	1610	1994	969	1404	882
mgp10854	4582135	T217V22	Navarrete 2015	75193927	278937	-22.41	-47.38	Humid subtropical	Cfa	20	1317	12	5.2	54	14	32	89328	229450	8120	10909	10230	4576	6334	949	988	474	677	438
mgp10854	4582136	T217V23	Navarrete 2015	39948409	153081	-22.41	-47.38	Humid subtropical	Cfa	20	1317	12	5.2	54	14	32	45800	117850	4126	5436	5158	2331	3256	472	523	249	429	244
mgp10854	4582137	T217V24	Navarrete 2015	50341767	188924	-22.41	-47.38	Humid subtropical	Cfa	20	1317	12	5.2	54	14	32	59021	150960	5363	7149	6797	2849	4324	555	633	312	477	338
mgp10854	4582138	T217V3	Navarrete 2015	71731090	268275	-22.41	-47.38	Humid subtropical	Cfa	20	1317	12	5.2	54	14	32	71120	183170	6485	8450	8083	3699	5205	772	828	350	662	270
mgp10854	4582139	T217V5	Navarrete 2015	48235670	182497	-22.41	-47.38	Humid subtropical	Cfa	20	1317	12	5.2	54	14	32	46001	119560	4252	5400	5269	2261	3279	513	490	274	393	206
mgp10854	4582140	T217V6	Navarrete 2015	69532834	261086	-22.41	-47.38	Humid subtropical	Cfa	20	1317	12	5.2	54	14	32	66153	173860	6083	7833	7443	3295	4964	737	783	398	613	283
mgp10854	4582141	T217V7	Navarrete 2015	63644298	243083	-22.41	-47.38	Humid subtropical	Cfa	20	1317	12	5.2	54	14	32	62520	162550	5732	7585	7027	3135	4567	705	760	352	571	255
mgp10854	4582142	T217V9	Navarrete 2015	146135429	552597	-22.41	-47.38	Humid subtropical	Cfa	20	1317	12	5.2	54	14	32	154190	399220	14242	18682	17820	8018	10847	1709	1810	881	1167	578
mgp10854	4582143	T7V1	Navarrete 2015	110697412	443764	-22.41	-47.38	Humid subtropical	Cfa	20	1317	12	5.2	54	14	32	118740	301860	11204	14090	13485	6218	8668	1296	1437	763	980	484
mgp10854	4582144	T7V10	Navarrete 2015	151235854	563293	-22.41	-47.38	Humid subtropical	Cfa	20	1317	12	5.2	54	14	32	150170	395740	13685	17902	17276	7866	10563	1664	1684	858	1262	644
mgp10854	4582145	T7V11	Navarrete 2015	91592446	348374	-22.41	-47.38	Humid subtropical	Cfa	20	1317	12	5.2	54	14	32	92419	240660	8614	10932	10738	4603	6669	1010	1077	461	754	372
mgp10854	4582146	T7V13	Navarrete 2015	229026435	872055	-22.41	-47.38	Humid subtropical	Cfa	20	1317	12	5.2	54	14	32	229950	603180	21357	27485	26273	11736	16215	2518	2715	1281	2079	952
mgp10854	4582147	T7V14	Navarrete 2015	167899889	701215	-22.41	-47.38	Humid subtropical	Cfa	20	1317	12	5.2	54	14	32	176370	461410	16220	21053	20082	8910	12502	2138	1943	1011	1565	778
mgp10854	4582148	T7V15	Navarrete 2015	42832283	177380	-22.41	-47.38	Humid subtropical	Cfa	20	1317	12	5.2	54	14	32	44446	116430	4013	5322	5062	2195	3230	508	552	252	376	189
mgp10854	4582149	T7V18	Navarrete 2015	237443487	882557	-22.41	-47.38	Humid subtropical	Cfa	20	1317	12	5.2	54	14	32	238540	623670	22377	28934	27120	12242	16540	2781	2903	1276	2006	961
mgp10854	4582150	T7V19	Navarrete 2015	46609894	179119	-22.41	-47.38	Humid subtropical	Cfa	20	1317	12	5.2	54	14	32	45910	120710	4183	5472	5209	2189	3339	590	541	243	388	171
mgp10854	4582151	T7V2	Navarrete 2015	112772969	447748	-22.41	-47.38	Humid subtropical	Cfa	20	1317	12	5.2	54	14	32	114400	296450	10535	13534	12699	5834	8338	1284	1366	616	1049	448
mgp10854	4582152	T7V20	Navarrete 2015	153403936	579705	-22.41	-47.38	Humid subtropical	Cfa	20	1317	12	5.2	54	14	32	164390	430890	15193	19679	18795	8609	11368	1897	2009	892	1349	776
mgp10854	4582153	T7V22	Navarrete 2015	180335902	741799	-22.41	-47.38	Humid subtropical	Cfa	20	1317	12	5.2	54	14	32	185890	489700	17163	22259	21153	9351	13448	2026	2308	1147	1600	832
mgp10854	4582154	T7V23	Navarrete 2015	124467080	497497	-22.41	-47.38	Humid subtropical	Cfa	20	1317	12	5.2	54	14	32	126940	334410	11764	15440	14511	6305	9400	1426	1577	757	1155	547
mgp10854	4582155	T7V24	Navarrete 2015	84225041	337758	-22.41	-47.38	Humid subtropical	Cfa	20	1317	12	5.2	54	14	32	86024	224810	7861	10409	9798	4414	6172	1025	1009	495	744	342
mgp10854	4582156	T7V3	Navarrete 2015	55769135	221454	-22.41	-47.38	Humid subtropical	Cfa	20	1317	12	5.2	54	14	32	55572	144060	5110	6361	6321	2721	4185	680	644	314	507	210
mgp10854	4582157	T7V5	Navarrete 2015	93737989	364943	-22.41	-47.38	Humid subtropical	Cfa	20	1317	12	5.2	54	14	32	95935	248400	8858	11492	10639	4971	6890	1096	1145	571	834	456
mgp10854	4582158	T7V6	Navarrete 2015	192940499	747782	-22.41	-47.38	Humid subtropical	Cfa	20	1317	12	5.2	54	14	32	196210	513880	17998	23445	22089	10086	13762	2218	2304	1133	1709	817
mgp10854	4582159	T7V7	Navarrete 2015	79707501	308912	-22.41	-47.38	Humid subtropical	Cfa	20	1317	12	5.2	54	14	32	78912	205980	7405	9565	8946	4122	5592	930	951	478	694	325
mgp10854	4582160	T7V9	Navarrete 2015	72816398	293141	-22.41	-47.38	Humid subtropical	Cfa	20	1317	12	5.2	54	14	32	74211	192230	6882	8956	8326	3791	5509	859	848	475	611	306
mgp13248	4626743	Bio1_1.filtered	Nguyen 2016	4403800990	43601990	21.0884	105.727	Subtropical-Dry Winter	Cwa	23.8	1678	112	6	36	39	25	5992800	14113000	563480	707660	648050	267240	515620	88468	71125	42884	55324	23020
mgp13248	4626744	Bio1_2.filtered	Nguyen 2016	4403800990	43601990	21.0884	105.727	Subtropical-Dry Winter	Cwa	23.8	1678	112	6	36	39	25	5985800	14095000	564330	707110	646910	268010	513730	88093	71419	42338	55973	22862
mgp13248	4626753	NPK1.mi	Nguyen 2016	1218720433	4094343	21.0884	105.727	Subtropical-Dry Winter	Cwa	23.8	1678	112	6	36	39	25	1240900	3195900	103000	139250	138360	57026	90122	15915	13799	9393	11289	4919
mgp13248	4626745	NPK1_1.filtered	Nguyen 2016	5390462819	53370919	21.0884	105.727	Subtropical-Dry Winter	Cwa	23.8	1678	112	6	36	39	25	7042500	16538000	651110	839290	752690	311840	589480	102680	78075	53716	63819	24222
mgp13248	4626746	NPK1_2.filtered	Nguyen 2016	5390462819	53370919	21.0884	105.727	Subtropical-Dry Winter	Cwa	23.8	1678	112	6	36	39	25	7019400	16486000	649280	837430	751540	311710	586850	102780	77520	52958	63719	23641
mgp13248	4626754	NPK2.mi	Nguyen 2016	1219671314	4094343	21.0884	105.727	Subtropical-Dry Winter	Cwa	23.8	1678	112	6	36	39	25	1108900	2826000	93081	126250	123340	50364	82638	14595	12439	8565	9972	4325
mgp13248	4626747	PC1_1.filtered	Nguyen 2016	4433473780	43895780	21.0884	105.727	Subtropical-Dry Winter	Cwa	23.8	1678	112	6	36	39	25	6036400	14409000	559940	716580	644440	268550	502150	89412	68672	47341	55204	21399
mgp13248	4626748	PC1_2.filtered	Nguyen 2016	4433473780	43895780	21.0884	105.727	Subtropical-Dry Winter	Cwa	23.8	1678	112	6	36	39	25	6028800	14394000	560430	716170	643160	268780	502910	89697	68735	46895	55574	21441
mgp13248	4626755	PIG1.mi	Nguyen 2016	1381298306	4665752	21.0884	105.727	Subtropical-Dry Winter	Cwa	23.8	1678	112	6	36	39	25	1434100	3713700	118980	159310	159800	66275	104800	18660	15793	10625	12760	6313
mgp13248	4626756	PIG2.mi	Nguyen 2016	1382587302	4665752	21.0884	105.727	Subtropical-Dry Winter	Cwa	23.8	1678	112	6	36	39	25	1293100	3311600	109060	144750	143800	58835	95917	16997	14554	9716	11579	5466
mgp1008	4485389	131	Pan 2014	40423549	105010	51.97	5.64	Oceanic	Cfb	9.4	781	53	5.7	50	28	22	25054	75311	1996	3124	2739	1111	1777	269	239	195	254	102
mgp1008	4485390	132	Pan 2014	44905782	114709	51.97	5.64	Oceanic	Cfb	9.4	781	53	5.7	50	28	22	27372	83059	2179	3355	3058	1268	1929	325	290	184	281	128
mgp1008	4485403	133	Pan 2014	49728531	126331	51.97	5.64	Oceanic	Cfb	9.4	781	53	5.7	50	28	22	30033	91445	2442	3817	3270	1297	2232	281	319	196	277	132
mgp1008	4485400	181	Pan 2014	51665672	130016	51.97	5.64	Oceanic	Cfb	9.4	781	53	5.7	50	28	22	31681	96877	2494	4173	3411	1427	2093	307	385	244	286	131
mgp1008	4485401	182	Pan 2014	52226427	133309	51.97	5.64	Oceanic	Cfb	9.4	781	53	5.7	50	28	22	32071	99748	2537	4040	3454	1536	2215	327	351	243	268	148
mgp1008	4485402	183	Pan 2014	43656772	113565	51.97	5.64	Oceanic	Cfb	9.4	781	53	5.7	50	28	22	26913	83243	2115	3246	3043	1217	1850	307	257	216	270	126
mgp1008	4485391	191	Pan 2014	52721323	134389	51.97	5.64	Oceanic	Cfb	9.4	781	53	5.7	50	28	22	35332	104010	2966	4170	3815	1626	2883	341	407	257	285	161
mgp1008	4485392	192	Pan 2014	42073456	113883	51.97	5.64	Oceanic	Cfb	9.4	781	53	5.7	50	28	22	27828	83501	2144	3363	3080	1267	2037	271	295	189	259	131
mgp1008	4485393	193	Pan 2014	38425397	96793	51.97	5.64	Oceanic	Cfb	9.4	781	53	5.7	50	28	22	24626	73286	2063	3099	2639	1137	1822	231	263	199	258	108
mgp1008	4485394	201	Pan 2014	33521299	84053	51.97	5.64	Oceanic	Cfb	9.4	781	53	5.7	50	28	22	20078	61097	1568	2514	2204	917	1537	212	183	154	168	111
mgp1008	4485395	202	Pan 2014	29433082	76677	51.97	5.64	Oceanic	Cfb	9.4	781	53	5.7	50	28	22	18211	56073	1511	2243	2031	847	1285	189	205	113	168	83
mgp1008	4485396	203	Pan 2014	32356773	83399	51.97	5.64	Oceanic	Cfb	9.4	781	53	5.7	50	28	22	18951	58545	1467	2409	2014	859	1359	229	207	140	182	81
mgp1008	4485397	251	Pan 2014	28573338	76859	51.97	5.64	Oceanic	Cfb	9.4	781	53	5.7	50	28	22	19844	58705	1622	2483	2061	930	1599	188	196	122	194	95
mgp1008	4485398	252	Pan 2014	28396437	78248	51.97	5.64	Oceanic	Cfb	9.4	781	53	5.7	50	28	22	19674	58347	1709	2412	2156	940	1447	200	191	134	203	105
mgp1008	4485399	253	Pan 2014	34738730	90340	51.97	5.64	Oceanic	Cfb	9.4	781	53	5.7	50	28	22	22873	70540	1984	2676	2583	1077	1790	251	258	162	198	98
mgp3513	4514245	Saline desert metagenome S1	Pandit 2015	387783372	2423783	23.8109	70.9832	Semi-arid hot desert	BSh	27.4	414	85	7.5	49	24	27	413440	1007100	37237	47163	43511	18591	40362	5468	5009	1981	3626	2075
mgp3513	4514299	Saline desert metagenome S2	Pandit 2015	322114449	2420832	23.7925	71.008	Semi-arid hot desert	BSh	27.4	439	85	7.5	49	24	27	264460	628000	23559	30222	28758	11717	25878	3760	3365	1335	1858	1801
mgp3513	4543019	Saline desert metagenome S3	Pandit 2015	282578916	2016127	23.0314	70.2152	Semi-arid hot desert	BSh	27	388	85	7.5	49	24	27	87138	216680	7186	7828	8347	4311	9899	820	1035	484	473	321
mgp3513	4543020	Saline desert metagenome S4	Pandit 2015	467782469	3100617	23.9081	70.5378	Semi-arid hot desert	BSh	27.3	354	85	7.5	49	24	27	273920	659720	23519	27581	27631	12230	32479	3407	3358	1490	1535	1169
mgp3513	4543021	Saline desert metagenome S5	Pandit 2015	235993491	2349820	23.9413	70.1884	Arid desert	BWh	27.1	312	85	7.5	49	24	27	53686	127910	4777	5524	5630	2501	5882	621	628	254	311	219
mgp3513	4543022	Saline desert metagenome S6	Pandit 2015	343077214	3041048	23.8349	69.5189	Arid desert	BWh	27	299	85	7.5	49	24	27	231790	548250	20075	22848	22887	10812	26552	2279	2816	1347	1223	909
mgp3513	4543023	Saline desert metagenome S7	Pandit 2015	308124473	2048827	23.941	70.1884	Arid desert	BWh	27.1	312	85	7.5	49	24	27	263180	635730	23581	28118	28649	12158	28915	2833	3522	1352	1440	1072
mgp271	4450130	Ctrl_shotgun	Ridl 2016	297444144	727529	48.99	14.16	Oceanic	Cfb	5.9	979	79	6.2	37	43	20	252620	662160	21177	27166	28978	12102	19481	2817	2826	1400	1982	1513
mgp271	4450131	CtrlF_shotgun	Ridl 2016	276871390	665714	48.99	14.16	Oceanic	Cfb	5.9	979	79	6.2	37	43	20	217350	580140	19190	24054	25495	11033	17506	2533	2892	1264	1461	1320
mgp271	4450171	Hor_shotgun	Ridl 2016	286480433	712104	48.99	14.16	Oceanic	Cfb	5.9	979	79	6.2	37	43	20	196520	541740	16733	21910	22484	9379	15917	2299	2442	1269	1640	1205
mgp271	4450172	HorF_shotgun	Ridl 2016	308435859	756433	48.99	14.16	Oceanic	Cfb	5.9	979	79	6.2	37	43	20	241220	652740	19475	26571	26930	10717	17440	2649	2871	1474	2000	1475
mgp271	4450628	Nig_shotgun	Ridl 2016	245662269	584208	48.99	14.16	Oceanic	Cfb	5.9	979	79	6.2	37	43	20	175880	485660	15229	19979	20047	8572	14551	1972	2132	1185	1382	1221
mgp271	4450629	NigF_shotgun	Ridl 2016	275891786	655217	48.99	14.16	Oceanic	Cfb	5.9	979	79	6.2	37	43	20	190640	524330	16468	21970	21917	9186	15378	2238	2343	1153	1517	1244
mgp271	4450630	Tob_shotgun	Ridl 2016	325348558	794668	48.99	14.16	Oceanic	Cfb	5.9	979	79	6.2	37	43	20	260130	712240	23270	30210	30313	12734	20770	3128	3301	1645	1866	1587
mgp271	4450631	TobF_shotgun	Ridl 2016	301519047	735196	48.99	14.16	Oceanic	Cfb	5.9	979	79	6.2	37	43	20	245890	685190	21455	28781	28468	12257	19200	3092	2971	1614	1890	1806
mgp7877	4552607	2012_1_corn_No_submit.fastq	Smith 2016	2937315025	29058789	39.7654	-84.848	Hot summer continental	Dfa	10.2	1024	105	6.1	51	32	17	3487100	8286400	334630	439260	382530	159030	298510	44736	41237	18142	32461	13290
mgp7877	4552597	2012_10_Soy_No_submit.fastq	Smith 2016	1431745529	14169028	39.9469	-84.8129	Hot summer continental	Dfa	10	995	105	6.1	51	32	17	1408300	3375300	136400	178860	153860	63160	121120	19794	17423	7449	13761	5716
mgp7877	4552598	2012_11_Corn_Yes_submit.fastq	Smith 2016	1235728039	12229474	39.9299	-84.7644	Hot summer continental	Dfa	10	995	105	6.1	51	32	17	1326900	3243700	127630	170170	145030	61084	109770	17716	15564	6692	12248	6068
mgp7877	4552599	2012_12_Soy_Yes_submit.fastq	Smith 2016	2976499049	29455785	39.9308	-84.7675	Hot summer continental	Dfa	10	995	105	6.1	51	32	17	3392200	8381300	318620	428150	367130	155500	276900	42918	39089	19213	31088	13984
mgp7877	4552600	2012_13_Corn_Yes_submit.fastq	Smith 2016	2918474743	28877883	39.8126	-84.9107	Hot summer continental	Dfa	10.2	1024	105	6.1	51	32	17	3575400	8494400	347430	444310	394900	169400	297590	46391	41476	18714	32529	13782
mgp7877	4552601	2012_14_Soy_Yes_submit.fastq	Smith 2016	1596035427	15793481	39.8011	-84.9214	Hot summer continental	Dfa	10.2	1024	105	6.1	51	32	17	1816200	4347900	174020	228230	199860	83160	155520	24407	21117	9906	16609	7013
mgp7877	4552602	2012_15_Corn_Yes_submit.fastq	Smith 2016	1343608914	13294138	39.4593	-84.9522	Humid subtropical	Cfa	10.9	1058	105	6.1	51	32	17	1587100	3971200	153060	202410	175230	75783	130150	20940	18044	9008	14497	6391
mgp7877	4552603	2012_16_soy_Yes_submit.fastq	Smith 2016	1754754798	17361712	39.4615	-84.9431	Humid subtropical	Cfa	10.9	1058	105	6.1	51	32	17	2038700	5002100	193320	259410	221260	95085	166340	28716	23714	11913	19248	8747
mgp7877	4552604	2012_17_Corn_Yes_submit.fastq	Smith 2016	1036580474	10258094	39.8792	-84.9792	Hot summer continental	Dfa	10	1003	105	6.1	51	32	17	1165800	2807000	112800	148220	128810	54923	96890	15040	13382	6112	10711	4495
mgp7877	4552605	2012_18_soy_Yes_submit.fastq	Smith 2016	4454201	44065	39.8763	-84.9789	Hot summer continental	Dfa	10	1003	105	6.1	51	32	17	3744	9332	343	485	393	176	289	58	43	23	34	15
mgp7877	4552606	2012_19_Corn_Yes_submit.fastq	Smith 2016	2921679340	28897599	39.8761	-84.9818	Hot summer continental	Dfa	10	1003	105	6.1	51	32	17	3097800	7495100	298090	386510	339090	142910	260680	42545	36896	17297	29478	13398
mgp7877	4552609	2012_2_Soy_No_submit.fastq	Smith 2016	2647555981	26201119	39.7738	-84.8161	Hot summer continental	Dfa	10.2	1022	105	6.1	51	32	17	2879400	6931100	277670	350890	312720	126360	247510	40347	35552	15227	28110	13679
mgp7877	4552608	2012_20_Soy_Yes_submit.fastq	Smith 2016	1286824690	12735016	39.8797	-84.9822	Hot summer continental	Dfa	10	1003	105	6.1	51	32	17	1426500	3434700	135610	181870	155740	65084	119860	19535	16422	7805	12730	5353
mgp7877	4552610	2012_3_corn_No_submit.fastq	Smith 2016	2452638515	24272188	39.7674	-84.8342	Hot summer continental	Dfa	10.2	1024	105	6.1	51	32	17	2642800	6366900	254650	331660	289620	120920	222320	36342	31388	14635	25972	10908
mgp7877	4552611	2012_4_Soy_No_submit.fastq	Smith 2016	1432525102	14174970	39.7738	-84.8286	Hot summer continental	Dfa	10.2	1022	105	6.1	51	32	17	1461000	3554800	139210	182340	158540	64906	124750	20232	17312	8235	13478	6468
mgp7877	4552612	2012_5_Corn_No_submit.fastq	Smith 2016	1186464826	11739217	39.8997	-85.0047	Hot summer continental	Dfa	9.9	1008	105	6.1	51	32	17	1338200	3198200	129170	170810	148060	61448	113390	17577	15737	7788	12727	4746
mgp7877	4552613	2012_6_Soy_No_submit.fastq	Smith 2016	3171919697	31391317	39.8997	-85.0079	Hot summer continental	Dfa	9.9	1008	105	6.1	51	32	17	3228600	7834400	309600	410440	353420	144850	273690	45195	38946	19444	31917	13235
mgp7877	4552614	2012_7_corn_No_submit.fastq	Smith 2016	1627589348	16105725	39.8877	-84.9814	Hot summer continental	Dfa	10	1003	105	6.1	51	32	17	1742900	4217700	167590	221750	190890	77818	149070	24250	21065	10423	16679	6690
mgp7877	4552615	2012_8_Soy_No_submit.fastq	Smith 2016	2230030788	22069730	39.8903	-84.9826	Hot summer continental	Dfa	10	1003	105	6.1	51	32	17	2336000	5639100	224980	292340	254560	105190	201420	33025	28254	12620	22696	9522
mgp7877	4552616	2012_9_Corn_No_submit.fastq	Smith 2016	1475556590	14599171	39.9469	-84.8147	Hot summer continental	Dfa	10	995	105	6.1	51	32	17	1538800	3695300	147710	193570	169300	69782	131940	20575	18840	8485	14880	6042
mgp7877	4552626	2013_1_Soy_No_submit.fastq	Smith 2016	3813242064	37717342	39.7654	-84.848	Hot summer continental	Dfa	10.2	1024	105	6.1	51	32	17	4318600	10366000	407610	531180	468110	192820	364880	55855	51875	23911	40606	17718
mgp7877	4552617	2013_11_Soy_Yes_submit.fastq	Smith 2016	1144230699	11311337	39.9299	-84.7644	Hot summer continental	Dfa	10	995	105	6.1	51	32	17	1187000	2870400	112330	150540	129010	53023	100230	16109	14129	6097	11113	5330
mgp7877	4552618	2013_12_Corn_Yes_submit.fastq	Smith 2016	1756407594	17335758	39.9308	-84.7675	Hot summer continental	Dfa	10	995	105	6.1	51	32	17	1998000	4830200	190430	249990	218230	93243	165650	24725	22937	11240	18286	8352
mgp7877	4552619	2013_13_Corn_Yes_submit.fastq	Smith 2016	1598448932	15798980	39.8126	-84.9107	Hot summer continental	Dfa	10.2	1024	105	6.1	51	32	17	1745100	4143200	169620	215210	191270	78517	149480	23326	20810	9011	15901	7539
mgp7877	4552620	2013_14_Corn_Yes_submit.fastq	Smith 2016	1787588588	17680870	39.8011	-84.9214	Hot summer continental	Dfa	10.2	1024	105	6.1	51	32	17	1975400	4680400	189850	244400	215610	87638	170640	26405	23627	10313	18219	8237
mgp7877	4552621	2013_15_Soy_Yes_submit.fastq	Smith 2016	2317770032	22931228	39.4593	-84.9522	Humid subtropical	Cfa	10.9	1058	105	6.1	51	32	17	2596700	6250800	246500	319960	279440	114320	223180	33996	30517	15561	23638	10457
mgp7877	4552622	2013_16_Corn_Yes_submit.fastq	Smith 2016	1888167542	18668477	39.4615	-84.9431	Humid subtropical	Cfa	10.9	1058	105	6.1	51	32	17	2116900	5091300	200980	262450	228310	93643	179220	28569	25490	12317	19686	9441
mgp7877	4552623	2013_17_Soy_Yes_submit.fastq	Smith 2016	1891570794	18674403	39.8792	-84.9792	Hot summer continental	Dfa	10	1003	105	6.1	51	32	17	1864200	4527200	174020	233520	201550	81806	160040	24282	22319	9750	16986	7891
mgp7877	4552624	2013_18_Corn_Yes_submit.fastq	Smith 2016	3617528765	35762397	39.8763	-84.9789	Hot summer continental	Dfa	10	1003	105	6.1	51	32	17	4052000	9730400	387700	504830	443700	184520	340310	53869	47946	21641	38013	17541
mgp7877	4552625	2013_19_Soy_Yes_submit.fastq	Smith 2016	1838277364	18164258	39.8761	-84.9818	Hot summer continental	Dfa	10	1003	105	6.1	51	32	17	1949600	4760400	184510	241890	211840	90283	164780	25966	22824	10012	18463	8614
mgp7877	4552630	2013_2_Corn_No_submit.fastq	Smith 2016	3644801503	36009146	39.7738	-84.8161	Hot summer continental	Dfa	10.2	1022	105	6.1	51	32	17	3772600	9071200	362510	456470	410400	165590	324360	52180	45927	18923	35861	17968
mgp7877	4552627	2013_20_Corn_Yes_submit.fastq	Smith 2016	3363860585	33236811	39.8797	-84.9822	Hot summer continental	Dfa	10	1003	105	6.1	51	32	17	3670100	8837400	349110	459530	396890	165230	309950	49208	43267	20249	33997	16661
mgp7877	4552628	2013_23_forest_submit.fastq	Smith 2016	4168197732	41202077	39.7509	-84.9188	Hot summer continental	Dfa	10.2	1024	105	6.1	51	32	17	4084600	10112000	371010	498700	440830	183290	330250	48052	49254	31410	42457	14412
mgp7877	4552629	2013_24_forest_submit.fastq	Smith 2016	2556441674	25292342	39.7956	-84.922	Hot summer continental	Dfa	10.2	1024	105	6.1	51	32	17	2556500	6186300	240430	317760	275990	111340	213770	35674	30849	18356	26519	9919
mgp7877	4552631	2013_3_Soy_No_submit.fastq	Smith 2016	1551039149	15338248	39.7674	-84.8342	Hot summer continental	Dfa	10.2	1024	105	6.1	51	32	17	1487700	3590100	141210	184070	161320	64887	128070	20400	18056	8430	14135	6177
mgp7877	4552632	2013_5_Soy_No_submit.fastq	Smith 2016	1533060133	15163928	39.8997	-85.0047	Hot summer continental	Dfa	9.9	1008	105	6.1	51	32	17	1652700	3969800	156390	208930	180830	74654	141810	21013	19600	9769	15541	5698
mgp7877	4552633	2013_6_Corn_No_submit.fastq	Smith 2016	1437615180	14220298	39.8997	-85.0079	Hot summer continental	Dfa	9.9	1008	105	6.1	51	32	17	1587100	3803000	151340	199910	173390	71559	135120	20636	19080	9029	14864	6315
mgp7877	4552634	2013_7_Soy_No_submit.fastq	Smith 2016	1270377420	12563469	39.8877	-84.9814	Hot summer continental	Dfa	10	1003	105	6.1	51	32	17	1144100	2779100	108600	143150	124750	50538	97499	15617	13657	6835	10938	4638
mgp7877	4552635	2013_8_Corn_No_submit.fastq	Smith 2016	1350535185	13345371	39.8903	-84.9826	Hot summer continental	Dfa	10	1003	105	6.1	51	32	17	1309800	3147400	125220	161820	141970	58053	113360	17313	15980	7321	12307	5287
mgp7877	4552636	2013_9_Soy_No_submit.fastq	Smith 2016	1650655226	16318159	39.9469	-84.8147	Hot summer continental	Dfa	10	995	105	6.1	51	32	17	1665800	3999600	159520	210380	181770	74447	142810	23836	19800	8719	15784	7137
mgp10541	4578926	CT_2_conventional tillage_ Cerrado Brazilian savannah_IonPGM	Souza 2014	1686703041	5850205	-15.6094	-47.7433	Tropical wet and dry or savanna	Aw	21.8	1434	23	5.2	44	15	41	1558100	4114000	133700	180210	173850	73370	113240	14897	19338	9917	14486	7563
mgp10541	4578927	CT_3_conventional tillage_ Cerrado Brazilian savannah_IonPGM	Souza 2014	1303666221	4898256	-15.6094	-47.7433	Tropical wet and dry or savanna	Aw	21.8	1434	23	5.2	44	15	41	1216200	3172200	104560	141280	135900	56646	90097	11778	15282	7339	11240	5562
mgp10541	4578924	NATIVE_2_Cerrado Brazilian savannah_IonPGM	Souza 2014	1221306956	5040252	-15.6094	-47.7433	Tropical wet and dry or savanna	Aw	21.8	1434	23	5.2	44	15	41	995160	2837700	79662	122930	106550	44967	62864	9783	11386	8626	10383	4157
mgp10541	4578925	NATIVE_3_Cerrado Brazilian savannah_IonPGM	Souza 2014	1470456607	5460208	-15.6094	-47.7433	Tropical wet and dry or savanna	Aw	21.8	1434	23	5.2	44	15	41	1162800	3319300	92495	140830	124890	53184	72868	10910	13341	9690	12044	5095
mgp10450	4577670	CT_1_conventional tillage_Cerrado Brazilian savannah_IonPGM	Souza 2016	1486805608	5420302	-15.6094	-47.7433	Tropical wet and dry or savanna	Aw	21.8	1434	23	5.2	44	15	41	1543800	4017500	131490	177880	172550	71244	116170	14611	19069	9525	14657	7243
mgp10450	4577669	NATIVE_1_Cerrado Brazilian savannah_IonPGM	Souza 2016	1562052023	5657434	-15.6094	-47.7433	Tropical wet and dry or savanna	Aw	21.8	1434	23	5.2	44	15	41	1319800	3799100	103080	163040	139400	58241	82274	11609	15044	10821	13027	5649
mgp10450	4577671	NT_1_no-tillage_Cerrado Brazilian savannah_IonPGM	Souza 2016	1466364965	5912295	-15.6094	-47.7433	Tropical wet and dry or savanna	Aw	21.8	1434	23	5.2	44	15	41	1518500	4014800	131980	177820	168950	70600	112530	15680	18693	9590	14700	7386
mgp10450	4577672	NT_3_no-tillage_Cerrado Brazilian savannah_IonPGM	Souza 2016	1507973051	5708651	-15.6094	-47.7433	Tropical wet and dry or savanna	Aw	21.8	1434	23	5.2	44	15	41	1603200	4170700	139170	184700	179960	73991	122490	15852	19836	9829	14767	7897
mgp252	4523023	11AA2065CMWeek1comunassem	Stackhouse 2015	6700261439	46206753	79.415	-90.7583	Tundra	ET	-21.1	115	300	6.9	59	32	9	7598700	18687000	755070	997290	861400	374350	755070	79601	99761	26506	48449	15659
mgp252	4523024	12AA2080CMWeek1comunassem	Stackhouse 2015	3464483270	23875634	79.415	-90.7583	Tundra	ET	-21.1	115	300	6.9	59	32	9	4461000	11797000	432960	594190	484320	230590	432960	62414	53099	16569	26927	10306
mgp252	4523144	13AA35CMWeek1comunassem	Stackhouse 2015	3766167478	26022581	79.415	-90.7583	Tundra	ET	-21.1	115	300	6.9	59	32	9	4700400	12960000	416470	572090	518660	215830	416470	43745	56291	34846	40720	15272
mgp252	4523145	15AA380CMWeek1comunassem	Stackhouse 2015	5614599082	38480957	79.415	-90.7583	Tundra	ET	-21.1	115	300	6.9	59	32	9	7537600	19987000	761280	1031700	821610	401110	761280	92855	92220	26817	48507	15825
mgp252	4521707	16AA365CMWeek1comunassem	Stackhouse 2015	2585421825	17894559	79.415	-90.7583	Tundra	ET	-21.1	115	300	6.9	59	32	9	2692200	6731200	263460	354400	308340	127000	263460	24123	35309	10667	16613	4602
mgp252	4521708	17AA3580CMWeek1comunassem	Stackhouse 2015	465642025	3130077	79.415	-90.7583	Tundra	ET	-21.1	115	300	6.9	59	32	9	494590	1261700	45062	61159	56383	23498	45062	5996	6134	1741	3533	1258
mgp252	4523775	18AA355CMWeek1comunassem	Stackhouse 2015	4925988000	33583779	79.415	-90.7583	Tundra	ET	-21.1	115	300	6.9	59	32	9	6118300	16120000	555100	747140	684190	279660	555100	57536	75973	43467	50704	16847
mgp252	4523146	1AA105CMWeek1comunassem	Stackhouse 2015	2205011588	14693575	79.415	-90.7583	Tundra	ET	-21.1	115	300	6.9	59	32	9	2227600	5993200	202010	273810	249560	102650	202010	21375	27463	13591	16902	6226
mgp252	4523776	20AA3565CMWeek1comunassem	Stackhouse 2015	812512042	5031403	79.415	-90.7583	Tundra	ET	-21.1	115	300	6.9	59	32	9	1088800	2624300	108730	136320	128020	55803	108730	9963	14201	3449	6576	2200
mgp252	4523777	3AA1065CMWeek1comunassem	Stackhouse 2015	2406267206	15706801	79.415	-90.7583	Tundra	ET	-21.1	115	300	6.9	59	32	9	3132100	8327600	294160	391500	353720	148200	294160	28990	39980	18878	23698	8335
mgp252	4523147	4AA1080CMWeek1comunassem	Stackhouse 2015	2541764475	16220012	79.415	-90.7583	Tundra	ET	-21.1	115	300	6.9	59	32	9	2928500	7483100	284040	375920	333580	145640	284040	29761	37103	11629	18870	6304
mgp252	4523778	5AA155CMWeek1comunassem	Stackhouse 2015	7078859018	48675652	79.415	-90.7583	Tundra	ET	-21.1	115	300	6.9	59	32	9	7786600	20415000	716170	973430	872120	353740	716170	71747	97680	48015	60686	19040
mgp252	4530050	5CMWeek1allassem	Stackhouse 2015	93390981	83249	79.415	-90.7583	Tundra	ET	-21.1	115	300	6.9	59	32	9	35680	98473	3061	4017	4332	1791	3061	293	496	179	292	115
mgp252	4523148	7AA1580CMWeek1comunassem	Stackhouse 2015	3494111865	23047923	79.415	-90.7583	Tundra	ET	-21.1	115	300	6.9	59	32	9	4780400	12770000	443960	608930	527330	235540	443960	63764	55245	17991	30363	12208
mgp252	4523779	8AA1565CMWeek1comunassem	Stackhouse 2015	4225726829	27416020	79.415	-90.7583	Tundra	ET	-21.1	115	300	6.9	59	32	9	5389800	13820000	526900	701880	613340	266140	526900	52283	69485	19941	33734	12691
mgp252	4523025	9AA205CMWeek1comunassem	Stackhouse 2015	2183775720	14544508	79.415	-90.7583	Tundra	ET	-21.1	115	300	6.9	59	32	9	2012100	5334700	183740	250030	227030	92140	183740	18912	25824	12014	14635	4667
mgp223	4445996	NTS_creosote.amb.1	Steven 2012	116821792	312444	36.8167	115.917	Subtropical-Dry Winter	Cwa	13.6	515	61	7.9	28	57	15	109260	318170	9863	13263	12882	6393	8020	1153	1240	394	742	672
mgp223	4445990	NTS_creosote.ele.1	Steven 2012	219117356	583724	36.8167	115.917	Subtropical-Dry Winter	Cwa	13.6	515	61	7.9	28	57	15	191530	555110	17436	23493	22222	10688	14394	2104	2158	571	1349	1197
mgp223	4445993	NTS_crust.amb.1	Steven 2012	133555260	352417	36.8167	115.917	Subtropical-Dry Winter	Cwa	13.6	515	61	7.9	28	57	15	95164	279900	8596	11693	11397	5492	7272	876	1049	407	602	399
mgp223	4445994	NTS_crust.ele.2	Steven 2012	254548462	683082	36.8167	115.917	Subtropical-Dry Winter	Cwa	13.6	515	61	7.9	28	57	15	232160	685560	20159	28760	26725	13275	17891	2217	2555	1062	1425	1221
mgp13205	4628823	B1_SB1_1	Su 2017	8626384500	86263845	22.11	112.77	Subtropical-Dry Winter	Cwa	22.6	1464	100	6	37	39	24	28690000	57045000	2374400	2859300	2486700	1190400	1555700	322340	278310	239290	256480	575160
mgp13205	4628824	B1_SB1_2	Su 2017	2930463000	29304630	22.11	112.77	Subtropical-Dry Winter	Cwa	22.6	1464	100	6	37	39	24	9728600	19362000	804150	970340	846080	400440	528360	109470	95298	81350	87143	194270
mgp13205	4628825	B2_SB2_1	Su 2017	8372459800	83724598	22.11	112.77	Subtropical-Dry Winter	Cwa	22.6	1464	100	6	37	39	24	23223000	46068000	2029500	2407900	2008200	1015000	1392700	288460	235770	195330	223620	450760
mgp13205	4628826	B2_SB2_2	Su 2017	5753935400	57539354	22.11	112.77	Subtropical-Dry Winter	Cwa	22.6	1464	100	6	37	39	24	15880000	31559000	1388100	1651900	1373500	689470	960290	197120	162340	133660	152080	304580
mgp13205	4628827	B3_SA1_1	Su 2017	8841671500	88416715	22.11	112.77	Subtropical-Dry Winter	Cwa	22.6	1464	100	6	37	39	24	40625000	72175000	2927900	3799400	3014700	1391800	1664100	417710	384170	339250	332060	633650
mgp13205	4628828	B3_SA1_2	Su 2017	3175243800	31752438	22.11	112.77	Subtropical-Dry Winter	Cwa	22.6	1464	100	6	37	39	24	14590000	25962000	1053000	1367500	1082800	498930	598870	149990	137760	122390	118620	226320
mgp13205	4626287	B4_SA2_1	Su 2017	3854190671	38541906	22.11	112.77	Subtropical-Dry Winter	Cwa	22.6	1464	100	6	37	39	24	14091000	27886000	1115300	1375600	1171200	544770	664540	145090	143180	116680	124220	241480
mgp13205	4628829	B4_SA2_2	Su 2017	1905620800	19056208	22.11	112.77	Subtropical-Dry Winter	Cwa	22.6	1464	100	6	37	39	24	7114600	13986000	562430	690340	592390	274100	332860	73424	71771	58194	62562	123070
mgp13205	4628830	Y1_TB1_1	Su 2017	4547269300	45472693	22.11	112.77	Subtropical-Dry Winter	Cwa	22.6	1464	100	6	37	39	24	5285500	12366000	447990	687110	558190	220420	493620	64642	60782	45256	46654	13259
mgp13205	4626288	Y1_TB1_2	Su 2017	4797390127	47973899	22.11	112.77	Subtropical-Dry Winter	Cwa	22.6	1464	100	6	37	39	24	5578300	13054000	473960	726080	586670	234760	518370	68720	64594	47609	49107	13929
mgp13205	4626289	Y2_N_1	Su 2017	5066531996	50665320	22.11	112.77	Subtropical-Dry Winter	Cwa	22.6	1464	100	6	37	39	24	6104100	14706000	531580	819640	638130	270080	526380	68892	65044	45400	41779	26223
mgp13205	4626290	Y2_N_2	Su 2017	4275596100	42755961	22.11	112.77	Subtropical-Dry Winter	Cwa	22.6	1464	100	6	37	39	24	5147200	12423000	450950	692760	536810	228950	439720	58651	55199	37822	35074	22208
mgp13205	4626291	Y3_TB2_1	Su 2017	5965667300	59656673	22.11	112.77	Subtropical-Dry Winter	Cwa	22.6	1464	100	6	37	39	24	8016400	19047000	717220	1028700	836100	361350	709980	112540	89745	65984	69498	21975
mgp13205	4626292	Y3_TB2_2	Su 2017	711577500	7115775	22.11	112.77	Subtropical-Dry Winter	Cwa	22.6	1464	100	6	37	39	24	1006500	2384800	89780	129700	105100	45596	87527	13767	11097	8339	8446	2895
mgp13205	4628831	Y4_TA1_1	Su 2017	10669379700	106693797	22.11	112.77	Subtropical-Dry Winter	Cwa	22.6	1464	100	6	37	39	24	13389000	32286000	1171600	1772700	1417600	582900	1213500	178290	148380	110680	111680	38077
mgp13205	4626293	Y5_TA2_1	Su 2017	2910226200	29102262	22.11	112.77	Subtropical-Dry Winter	Cwa	22.6	1464	100	6	37	39	24	3455400	8383100	306540	450300	368500	156700	305580	46143	38452	28488	28211	10833
mgp13205	4626294	Y5_TA2_2	Su 2017	3018521300	30185213	22.11	112.77	Subtropical-Dry Winter	Cwa	22.6	1464	100	6	37	39	24	3547900	8598900	315370	461000	379740	161100	314120	46772	39326	28980	28556	11398
mgp13205	4626295	Y5_TA2_3	Su 2017	4191274000	41912740	22.11	112.77	Subtropical-Dry Winter	Cwa	22.6	1464	100	6	37	39	24	4957200	12018000	438240	646290	528740	223130	442320	65727	55071	40572	40724	16079
mgp375	4487638	Site 1 Dry	Taketani 2015	39262964	289162	-9.22356	-41.0865	Semi-arid hot desert	BSh	25.5	482	0	6.3	56	21	24	3180	7198	344	467	356	183	259	41	51	14	26	10
mgp375	4487345	Site 1 rainy	Taketani 2015	59973310	425184	-9.22356	-41.0865	Semi-arid hot desert	BSh	25.5	482	0	6.3	56	21	24	31947	74322	3203	4638	3737	1913	2744	492	363	127	299	101
mgp375	4487639	Site 2 Dry	Taketani 2015	71575930	503318	-8.83378	-42.5537	Semi-arid hot desert	BSh	26.3	712	0	5.7	68	16	17	25905	59766	2592	3398	2899	1426	2695	322	325	144	235	60
mgp375	4487344	Site 2 rainy	Taketani 2015	81657620	561526	-8.83378	-42.5537	Semi-arid hot desert	BSh	26.3	712	0	5.7	68	16	17	50015	116030	5091	6603	5561	2701	4558	639	585	323	375	156
mgp375	4487653	Site 3 Dry	Taketani 2015	65001425	466014	-6.71228	-38.2523	Tropical wet and dry or savanna	Aw	26.6	883	0	6.4	55	24	21	33877	79051	3478	4600	3800	1886	2868	530	479	211	345	88
mgp375	4487567	Site 3 rainy	Taketani 2015	52102364	371520	-6.71228	-38.2523	Tropical wet and dry or savanna	Aw	26.6	883	0	6.4	55	24	21	9146	20775	871	1164	1010	412	929	129	91	37	64	34
mgp14608	4654021	Y1	Taketani 2017	1811246657	9681819	33	35.2333	Mediterranean hot summer	Csa	19	762	25	7.4	45	31	24	2172800	5841900	189340	251630	241400	101510	159690	23489	25311	8967	18061	12998
mgp14608	4654022	Y11	Taketani 2017	830740317	4484452	33	35.2333	Mediterranean hot summer	Csa	19	762	25	7.4	45	31	24	1024600	2741400	89694	118200	114360	47778	76930	10661	11969	4229	8337	6573
mgp14608	4654023	Y16	Taketani 2017	711633780	3762792	31.7	35.05	Mediterranean hot summer	Csa	18.3	485	25	7.4	45	31	24	811590	2166900	69802	91428	91392	38148	66124	7139	9897	3185	5702	4288
mgp14608	4654024	Y21	Taketani 2017	977801012	5346169	31.7	35.05	Mediterranean hot summer	Csa	18.3	485	25	7.4	45	31	24	1108900	2897500	95149	123380	126710	53110	92996	9664	13320	4057	7349	5380
mgp14608	4654025	Y26	Taketani 2017	698042789	3808872	31.7	35.05	Mediterranean hot summer	Csa	18.3	485	25	7.4	45	31	24	812740	2123600	69369	90762	93309	39379	67764	7167	9551	2999	5437	4209
mgp14608	4654026	Y31	Taketani 2017	908651569	4902736	31.0333	34.9	Semi-arid hot desert	BSh	18.8	203	25	7.4	45	31	24	1046300	2819700	89664	118410	117140	49314	81935	9933	12222	4358	7789	6313
mgp14608	4654027	Y36	Taketani 2017	523421685	2840653	31.0333	34.9	Semi-arid hot desert	BSh	18.8	203	25	7.4	45	31	24	599400	1617000	52002	68800	66744	28390	46059	5870	7074	2458	4733	3556
mgp14608	4654028	Y41	Taketani 2017	572066482	3129422	31.0333	34.9	Semi-arid hot desert	BSh	18.8	203	25	7.4	45	31	24	646870	1733600	55666	74717	72083	30663	50824	6235	7805	2622	4974	3962
mgp14608	4654029	Y46	Taketani 2017	503468033	2725118	30.8667	34.7667	Semi-arid hot desert	BSh	18.8	167	25	7.4	45	31	24	599360	1518400	52312	68595	70813	29957	50546	5302	7371	2080	3554	2418
mgp14608	4654030	Y51	Taketani 2017	531699676	2915911	30.8667	34.7667	Semi-arid hot desert	BSh	18.8	167	25	7.4	45	31	24	632310	1633000	54446	70347	72586	29826	52171	5103	7707	2413	4284	3283
mgp14608	4654031	Y56	Taketani 2017	461408862	2528610	30.8667	34.7667	Semi-arid hot desert	BSh	18.8	167	25	7.4	45	31	24	580500	1451200	51313	65930	68183	28937	49403	5039	6762	1935	3587	2475
mgp14608	4654032	Y6	Taketani 2017	735731341	4053435	33	35.2333	Mediterranean hot summer	Csa	19	762	25	7.4	45	31	24	880320	2330300	77148	102110	98396	41002	67984	9445	10518	3506	7074	5034
mgp10865	4582785	T12	Tripathi 2016	890482723	5107828	4.96495	117.821	Tropical rainforest	Af	24.9	2291	65	4.7	46	27	28	902180	2485000	75250	102670	99229	42979	60156	9946	10235	5872	9192	3648
mgp10865	4582786	T13	Tripathi 2016	964778783	5523247	4.9498	117.807	Tropical rainforest	Af	24.9	2291	65	4.7	46	27	28	955710	2648700	79878	110610	102850	45346	63804	10833	11121	6141	9555	3893
mgp10865	4582787	T14	Tripathi 2016	989118182	5657390	4.95909	117.804	Tropical rainforest	Af	24.9	2291	65	4.7	46	27	28	1048500	2872800	88654	119760	114970	49982	71399	12434	12222	6930	10576	4730
mgp10865	4582788	T17	Tripathi 2016	934244819	5365741	4.97136	117.786	Tropical rainforest	Af	24.9	2291	65	4.7	46	27	28	1013100	2770200	86600	116600	111160	48638	67851	11964	11795	6908	10694	4800
mgp10865	4582789	T20	Tripathi 2016	1030019164	5840128	4.97052	117.816	Tropical rainforest	Af	24.9	2291	65	4.7	46	27	28	1036500	2904700	86433	118570	113030	48751	69086	12075	11783	6678	10745	4379
mgp10865	4582790	T28	Tripathi 2016	855486915	4892887	4.92604	117.949	Tropical rainforest	Af	25.2	2246	65	4.7	46	27	28	933920	2481800	81813	104140	104050	44577	65549	11848	10901	7090	9980	4250
mgp10865	4582791	T34	Tripathi 2016	885006509	5039711	5.09316	117.636	Tropical rainforest	Af	25.8	2487	65	4.7	46	27	28	1027600	2664100	94016	114530	116630	48516	74026	13445	12390	7685	10932	5225
mgp10865	4582792	T35	Tripathi 2016	800887970	4584476	5.09575	117.63	Tropical rainforest	Af	25.8	2487	65	4.7	46	27	28	956320	2471900	87214	108280	106930	45859	68105	12511	11501	6261	10285	5678
mgp10865	4582793	T38	Tripathi 2016	958840711	5460061	5.09517	117.646	Tropical rainforest	Af	25.8	2487	65	4.7	46	27	28	1132300	2972700	102090	127720	126700	53885	80492	15281	13623	7276	12380	6355
mgp10865	4582794	T41	Tripathi 2016	810908299	4608250	5.02092	117.752	Tropical rainforest	Af	25.7	2426	65	4.7	46	27	28	847410	2334500	71743	95329	93774	40455	57391	10287	9676	5601	9073	3689
mgp10865	4582795	T46	Tripathi 2016	960144683	5484909	4.98554	117.86	Tropical rainforest	Af	25.2	2246	65	4.7	46	27	28	1010700	2800400	86197	115840	110550	48337	67575	12133	11780	6396	10745	4469
mgp10865	4582796	T52	Tripathi 2016	1005523825	5786291	4.9334	117.981	Tropical rainforest	Af	25.2	2246	65	4.7	46	27	28	1122200	2990800	97472	126530	124970	53366	78327	14067	13788	9089	11279	5335
mgp10865	4582797	T54	Tripathi 2016	703067533	4000557	5.02156	117.79	Tropical rainforest	Af	25.7	2426	65	4.7	46	27	28	805200	2138900	71955	91318	90450	38752	57083	10180	9649	5291	8292	4173
mgp10865	4582798	T55	Tripathi 2016	953239023	5415884	5.02812	117.787	Tropical rainforest	Af	25.7	2426	65	4.7	46	27	28	951430	2636300	78715	110820	103020	45567	63604	10687	10818	5886	8809	3645
mgp10865	4582799	T60	Tripathi 2016	873743523	4972424	5.08979	117.681	Tropical rainforest	Af	25.7	2426	65	4.7	46	27	28	933310	2539600	79814	106790	102950	44186	63790	11338	10986	6026	9758	4237
mgp10865	4582800	T63	Tripathi 2016	876592324	5014637	5.07986	117.706	Tropical rainforest	Af	25.7	2426	65	4.7	46	27	28	1003400	2641500	89747	113120	112450	47694	71801	13333	12179	6190	10516	5315
mgp10865	4582801	T64	Tripathi 2016	1251623517	7246813	5.08484	117.708	Tropical rainforest	Af	25.7	2426	65	4.7	46	27	28	1298900	3558200	112510	149610	142530	61659	89380	15674	14752	8057	13178	5957
mgp10865	4582802	T71	Tripathi 2016	1102244080	6379859	5.08372	117.776	Tropical rainforest	Af	25.7	2426	65	4.7	46	27	28	1226200	3310500	108190	141650	135690	57907	89989	14455	14216	8144	11301	5643
mgp10865	4582803	T72	Tripathi 2016	934349523	5355308	5.07999	117.783	Tropical rainforest	Af	25.7	2426	65	4.7	46	27	28	1094400	2911500	97265	124690	122740	52023	78990	12990	12651	7662	10619	5940
mgp10865	4582804	T73	Tripathi 2016	961687707	5531464	4.49215	117.773	Tropical rainforest	Af	26.8	2043	65	4.7	46	27	28	1176800	3140000	105270	137340	132450	57652	85336	13691	13403	7126	10356	5431
mgp10865	4582805	T74	Tripathi 2016	883442267	5106138	4.49784	117.781	Tropical rainforest	Af	26.8	2043	65	4.7	46	27	28	1060200	2735600	95789	120650	118620	50621	79364	12216	12636	6203	9407	5084
mgp10865	4582806	T75	Tripathi 2016	1251177168	7203353	4.49018	117.724	Tropical rainforest	Af	26.8	2043	65	4.7	46	27	28	1329600	3669700	117890	163170	148040	66023	95690	13934	14695	8755	11496	5185
mgp10865	4582807	T76	Tripathi 2016	935187469	5409688	4.49794	117.727	Tropical rainforest	Af	26.8	2043	65	4.7	46	27	28	1056600	2851600	92424	123370	117910	50070	76910	12324	12385	6353	9853	4806
mgp10865	4582808	TDB	Tripathi 2016	1030529654	5822722	4.93717	117.947	Tropical rainforest	Af	25.2	2246	65	4.7	46	27	28	1019800	2894600	83300	118770	110210	47885	66627	11585	11547	6740	9770	4158
mgp4192	4450125	K1a_metagenome	Tveit 2012	41875887	103366	78.9422	11.8157	Tundra	ET	-6.3	414	237	6.3	52	35	13	28824	80318	2660	3407	3144	1380	2178	344	409	260	253	175
mgp4192	4450126	K1b_metagenome	Tveit 2012	41420719	101781	78.9422	11.8157	Tundra	ET	-6.3	414	237	6.3	52	35	13	30804	81276	2898	3737	3433	1481	2465	382	436	303	255	134
mgp4192	4450127	K1c_metagenome	Tveit 2012	56221307	136679	78.9422	11.8157	Tundra	ET	-6.3	414	237	6.3	52	35	13	44361	116310	3977	5841	4925	2112	3574	507	562	451	318	180
mgp4192	4450124	S2a_metagenome	Tveit 2012	36339223	89359	78.9258	11.9433	Tundra	ET	-6.4	416	237	6.3	52	35	13	26119	71251	2429	2985	2851	1212	2099	335	335	241	234	157
mgp4192	4450123	S2b_metagenome	Tveit 2012	43926749	108237	78.9258	11.9433	Tundra	ET	-6.4	416	237	6.3	52	35	13	32106	87203	2917	3762	3637	1483	2489	388	417	284	285	141
mgp15251	4667027	BG123.use	Van Goethem 2018	2354568638	7730414	-76.8691	161.752	Ice cap	EF	-25	210	0	8.3	96	1	3	256520	886160	17708	23691	29261	9682	19832	836	2619	2907	809	1326
mgp15251	4667031	CN4.use	Van Goethem 2018	2891256021	9464484	-76.1105	162.014	Ice cap	EF	-25	210	0	8.3	96	1	3	307480	1007500	22031	36293	36494	14216	23063	1915	3110	1576	1718	1707
mgp15251	4667025	MG64.extendedFrags	Van Goethem 2018	2435180252	8126681	-76.8226	162.107	Ice cap	EF	-25	210	0	8.3	96	1	3	357490	1151300	27505	37604	42476	15657	28278	1450	3281	2023	1676	2127
mgp15251	4667018	MGM3.use	Van Goethem 2018	2795914895	9469426	-76.1608	162.016	Ice cap	EF	-25	210	0	8.3	96	1	3	753090	2122000	61062	86422	87726	37041	59940	4098	8383	3408	3038	4522
mgp15251	4667020	MS11.use	Van Goethem 2018	2551174732	8206577	-77.0191	161.782	Ice cap	EF	-25	210	0	8.3	96	1	3	356760	1097500	27382	39622	40703	18456	27545	1706	3862	2767	1831	2328
mgp15251	4667033	MS22.use	Van Goethem 2018	2681821581	8846170	-77.0109	161.767	Ice cap	EF	-25	210	0	8.3	96	1	3	154020	521430	10607	15360	16695	6142	13014	645	1815	1350	687	943
mgp15251	4667023	MS35.use	Van Goethem 2018	3137282983	10765138	-77.0182	161.742	Ice cap	EF	-25	210	0	8.3	96	1	3	119320	501130	7190	11680	13183	4833	9884	469	1277	880	582	692
mgp15251	4667029	MS41.use	Van Goethem 2018	3218382203	11178757	-77.0231	161.713	Ice cap	EF	-25	210	0	8.3	96	1	3	861750	2520800	64832	98542	99950	37164	67810	3128	8669	4862	4000	6425
mgp15251	4667021	MS51.use	Van Goethem 2018	2747112378	8850331	-77.0262	161.675	Ice cap	EF	-25	210	0	8.3	96	1	3	657540	1897500	51382	71625	74958	30299	51937	3114	7736	3470	2741	4552
mgp15251	4667028	MS65.use	Van Goethem 2018	2822157282	9246318	-77.0184	161.71	Ice cap	EF	-25	210	0	8.3	96	1	3	362790	1054000	29467	38963	41693	16826	29586	1345	4115	3926	1333	2003
mgp15251	4667019	MS75.use	Van Goethem 2018	3056039766	10609771	-77.0247	161.759	Ice cap	EF	-25	210	0	8.3	96	1	3	199420	723090	14996	21738	22617	9049	16041	786	1992	1303	863	1983
mgp15251	4667036	MtG225.use	Van Goethem 2018	3301592388	10510936	-76.9671	161.162	Ice cap	EF	-25	210	0	8.3	96	1	3	448580	1142200	37671	51848	53980	21672	35084	1882	4476	1407	1861	3456
mgp15251	4667030	MtG4.use	Van Goethem 2018	2536587261	8204285	-76.9522	161.404	Ice cap	EF	-25	210	0	8.3	96	1	3	1538800	4015000	122480	178050	184400	71509	117510	5759	18222	7470	5822	11947
mgp15251	4667026	PT2.use	Van Goethem 2018	2557875769	8284819	-77.046	161.359	Ice cap	EF	-25	210	0	8.3	96	1	3	1010200	2880000	75246	112210	114070	46802	81530	4083	10793	4370	4426	5681
mgp15251	4667034	TG15.use	Van Goethem 2018	1149752218	4023268	-76.6546	161.093	Ice cap	EF	-25	210	0	8.3	96	1	3	292350	830980	21590	32725	33026	13112	22511	1105	3363	1019	1240	1722
mgp15251	4667032	TG51.use	Van Goethem 2018	1120336883	3980751	-76.7288	161.012	Ice cap	EF	-25	210	0	8.3	96	1	3	573190	1567200	46109	64273	66417	26474	47144	2140	6038	2877	2320	3491
mgp11442	4600900	Ah-1-1.fastq	Weigold 2016	887511049	3172850	48.5067	9.04139	Oceanic	Cfb	8.7	775	64	6.6	37	42	21	704110	2119900	50686	80949	71323	29968	40009	6500	7105	4824	7121	3037
mgp11442	4600902	Ah-2-1.fastq	Weigold 2016	285329764	988295	48.5067	9.04139	Oceanic	Cfb	8.7	775	64	6.6	37	42	21	181230	527820	12331	20286	17517	7132	10646	1599	1801	1246	1739	714
mgp11442	4600904	II-P-1-1.fastq	Weigold 2016	735268782	2608969	48.5067	9.04139	Oceanic	Cfb	8.7	775	64	6.6	37	42	21	533060	1554000	37956	62978	53679	22506	30528	4977	5242	3290	5093	2099
mgp11442	4600906	II-P-2-1.fastq	Weigold 2016	1120730678	4354330	48.5067	9.04139	Oceanic	Cfb	8.7	775	64	6.6	37	42	21	829490	2428100	58080	97871	83269	34498	47288	7598	8084	5308	7932	3173
mgp11442	4600908	Of-1-1.fastq	Weigold 2016	1006186248	3591383	48.5067	9.04139	Oceanic	Cfb	8.7	775	64	6.6	37	42	21	800370	2291000	62476	89146	81801	33757	50193	7372	8849	5532	8146	4645
mgp11442	4600910	Of-2-1.fastq	Weigold 2016	1155439877	4680725	48.5067	9.04139	Oceanic	Cfb	8.7	775	64	6.6	37	42	21	1050800	3009000	82757	118560	108860	45305	66290	9681	11791	7462	11097	6296
mgp11296	4600198	C1d0	Zafra 2016	277226894	806947	19.4022	-98.0483	Dry winter Subtropical Highland	Cwb	14.2	748	101	6.8	45	24	31	298670	796340	19381	34762	25084	10655	14161	2695	2956	2023	2641	3475
mgp11296	4600199	C1d16	Zafra 2016	242164452	738035	19.4022	-98.0483	Dry winter Subtropical Highland	Cwb	14.2	748	101	6.8	45	24	31	291020	790350	21076	36545	26856	11208	14919	2992	3027	1954	2951	3861
mgp11296	4600200	C1d30	Zafra 2016	258792943	780405	19.4022	-98.0483	Dry winter Subtropical Highland	Cwb	14.2	748	101	6.8	45	24	31	251210	682880	20743	26780	27864	10808	16806	2569	2598	1132	2455	3194
mgp11296	4658539	Contd0	Zafra 2016	541528045	2034720	19.4022	-98.0483	Dry winter Subtropical Highland	Cwb	14.2	748	101	6.8	45	24	31	467350	1300300	40934	58792	52344	21660	30426	4988	4694	1581	3867	3722
mgp11296	4658538	Contd16	Zafra 2016	618259364	2202675	19.4022	-98.0483	Dry winter Subtropical Highland	Cwb	14.2	748	101	6.8	45	24	31	384140	1304400	26599	49720	33738	14263	23684	3844	3318	2159	3225	3788
mgp11296	4658540	Contd30	Zafra 2016	589633606	2197197	19.4022	-98.0483	Dry winter Subtropical Highland	Cwb	14.2	748	101	6.8	45	24	31	510840	1374800	37827	57734	45529	19902	29718	5280	5093	3044	3811	8722
mgp4184	4520354	soil_S29_L001_R1_001	Zarraonaindia 2015	43380079	172829	41.015	-72.5285	Humid subtropical	Cfa	10.6	1150	205	5.2	59	32	9	33077	94536	2809	3807	3610	1451	2842	394	414	175	301	195
mgp4184	4520356	soil_S30_L001_R2_001	Zarraonaindia 2015	67581750	269250	41.0094	-72.4943	Oceanic	Cfb	10.5	1159	205	5.2	59	32	9	38686	103070	3159	4562	4224	1693	3359	435	485	235	334	170
mgp4184	4520358	soil_S31_L001_R2_001	Zarraonaindia 2015	53897230	214730	41.0093	-72.4942	Oceanic	Cfb	10.5	1159	205	5.2	59	32	9	26141	68165	2383	3077	2805	1081	2447	322	335	156	213	111
mgp4184	4520360	soil_S32_L001_R2_001	Zarraonaindia 2015	52938410	210910	41.0144	-72.5285	Humid subtropical	Cfa	10.6	1150	205	5.2	59	32	9	30224	81936	2626	3511	3225	1276	2611	356	390	147	284	157
mgp4184	4520362	soil_S33_L001_R2_001	Zarraonaindia 2015	29886068	119068	41.015	-72.5285	Humid subtropical	Cfa	10.6	1150	205	5.2	59	32	9	14649	40006	1206	1603	1581	626	1355	188	204	85	144	81
mgp4184	4520364	soil_S34_L001_R2_001	Zarraonaindia 2015	57627592	229592	41.0094	-72.4943	Oceanic	Cfb	10.5	1159	205	5.2	59	32	9	32020	87855	2820	3680	3622	1397	2757	380	425	193	280	146
mgp4184	4520366	soil_S35_L001_R2_001	Zarraonaindia 2015	43091931	171681	41.0256	-72.4617	Oceanic	Cfb	10.5	1159	205	5.2	59	32	9	17724	48081	1567	2013	1988	737	1615	229	228	83	163	83
mgp4184	4520368	soil_S36_L001_R2_001	Zarraonaindia 2015	59765359	238109	41.0151	-72.5287	Humid subtropical	Cfa	10.6	1150	205	5.2	59	32	9	33610	91267	3078	3818	3662	1447	2978	411	383	179	266	180
mgp4184	4520370	soil_S37_L001_R2_001	Zarraonaindia 2015	82318964	327964	41.0627	-75.4501	Warm summer continental or hemiboreal	Dfb	7.3	1217	333	4.4	45	42	12	34459	93228	3156	4059	3797	1493	3042	420	428	176	251	133
mgp4184	4520372	soil_S38_L001_R2_001	Zarraonaindia 2015	63085085	251335	41.0254	-72.4617	Oceanic	Cfb	10.5	1159	205	5.2	59	32	9	26638	72292	2323	3116	2999	1138	2303	320	339	144	201	96
mgp4184	4520374	soil_S39_L001_R2_001	Zarraonaindia 2015	105308305	419555	41.0094	-72.4943	Oceanic	Cfb	10.5	1159	205	5.2	59	32	9	44613	118730	3895	5163	4964	1854	4000	529	543	239	396	163
mgp4184	4520376	soil_S40_L001_R2_001	Zarraonaindia 2015	64991681	258931	41.0151	-72.5286	Humid subtropical	Cfa	10.6	1150	205	5.2	59	32	9	29241	79610	2544	3338	3221	1285	2684	347	397	168	260	153
mgp4184	4520378	soil_S41_L001_R2_001	Zarraonaindia 2015	73428544	292544	41.015	-72.5285	Humid subtropical	Cfa	10.6	1150	205	5.2	59	32	9	35063	94954	3087	3976	3882	1548	3097	414	468	198	330	173
mgp4184	4520380	soil_S42_L001_R2_001	Zarraonaindia 2015	58978474	234974	41.0145	-72.5285	Humid subtropical	Cfa	10.6	1150	205	5.2	59	32	9	24653	65978	2202	2855	2664	1053	2248	296	313	129	206	112
mgp4184	4520382	soil_S43_L001_R2_001	Zarraonaindia 2015	29707607	118357	41.0254	-72.4617	Oceanic	Cfb	10.5	1159	205	5.2	59	32	9	12553	33878	1215	1450	1350	560	1131	158	147	82	93	55
mgp4184	4520384	soil_S44_L001_R2_001	Zarraonaindia 2015	69949935	278685	41.0143	-72.5287	Humid subtropical	Cfa	10.6	1150	205	5.2	59	32	9	29659	80507	2596	3350	3330	1244	2557	356	449	161	270	153
mgp4184	4520386	soil_S45_L001_R2_001	Zarraonaindia 2015	58404688	232688	41.0144	-72.5285	Humid subtropical	Cfa	10.6	1150	205	5.2	59	32	9	26726	73172	2400	3013	2865	1112	2406	340	332	148	212	143
mgp4184	4520388	soil_S46_L001_R2_001	Zarraonaindia 2015	57175290	227790	41.0095	-72.4943	Oceanic	Cfb	10.5	1159	205	5.2	59	32	9	26353	69605	2275	3052	2919	1162	2181	284	354	164	235	106
mgp4184	4520390	soil_S47_L001_R2_001	Zarraonaindia 2015	72401201	288451	41.0144	-72.5284	Humid subtropical	Cfa	10.6	1150	205	5.2	59	32	9	30562	82230	2696	3492	3410	1316	2715	363	354	182	274	150
mgp4184	4520392	soil_S48_L001_R2_001	Zarraonaindia 2015	71699405	285655	41.0153	-72.5282	Humid subtropical	Cfa	10.6	1150	205	5.2	59	32	9	29751	79194	2586	3488	3333	1324	2626	311	383	157	253	164
mgp6860	4544233	Prilba_Seasons	Žifčáková 2017	1641087512	4523921	49.0438	13.6171	Oceanic	Cfb	4.9	1064	79	6.2	37	43	20	838080	3114000	45478	83898	88446	26971	115220	6112	7154	4027	6146	4122
mgp6860	4627252	Prilba_Seasons_MG	Žifčáková 2017	4262182344	9380309	49.0438	13.6171	Oceanic	Cfb	4.9	1064	79	6.2	37	43	20	2990000	9039000	238150	344800	323630	142850	186050	28189	32616	19847	31794	16503
#Broad functions include AAD (Amino Acids and Derivatives), CHO (Carbohydrates), CBS (Clustering-based Subsystems), CVPGP (Cofactors, Vitamins, Prosthetic Groups, Pigments), and Protein (Protein Metabolism). Narrow functions contain N (Nitrogen Metabolism), P (Phosphorous Metabolism), K (Potassium Metabolism), S (Sulfur Metabolism), and Fe (Iron Acquisition and Metabolism).
*Publication list:
1. Andreote FD, Jiménez DJ, Chaves D, Dias ACF, Luvizotto DM, Dini-Andreote F, et al. The microbiome of Brazilian mangrove sediments as revealed by metagenomics. PloS one. 2012;7(6):e38600.
2. Argiroff WA, Zak DR, Lanser CM, Wiley MJ. Microbial Community Functional Potential and Composition Are Shaped by Hydrologic Connectivity in Riverine Floodplain Soils. Microbial ecology. 2017;73(3):630-44.
3. Bach EM, Williams RJ, Hargreaves SK, Yang F, Hofmockel KS. Greatest soil microbial diversity found in micro-habitats. Soil Biology and Biochemistry. 2018;118:217-26.
4. Bell TH, Stefani FO, Abram K, Champagne J, Yergeau E, Hijri M, et al. A Diverse Soil Microbiome Degrades More Crude Oil than Specialized Bacterial Assemblages Obtained in Culture. Applied and environmental microbiology. 2016;82(18):5530-41.
5. Castaneda LE, Barbosa O. Metagenomic analysis exploring taxonomic and functional diversity of soil microbial communities in Chilean vineyards and surrounding native forests. PeerJ. 2017;5:e3098.
6. Chang HX, Haudenshield JS, Bowen CR, Hartman GL. Metagenome-Wide Association Study and Machine Learning Prediction of Bulk Soil Microbiome and Crop Productivity. Frontiers in microbiology. 2017;8:519.
7. Choi S, Song H, Tripathi BM, Kerfahi D, Kim H, Adams JM. Effect of experimental soil disturbance and recovery on structure and function of soil community: a metagenomic and metagenetic approach. Scientific reports. 2017;7(1):2260.
8. Cline LC, Zak DR, Upchurch RA, Freedman ZB, Peschel AR. Soil microbial communities and elk foraging intensity: implications for soil biogeochemical cycling in the sagebrush steppe. Ecology letters. 2017;20(2):202-11.
9. Cline LC, Zak DR, Upchurch RA, Freedman ZB, Peschel AR. Soil microbial communities and elk foraging intensity: implications for soil biogeochemical cycling in the sagebrush steppe. Ecology letters. 2017;20(2):202-11.
10. Cobo-Diaz JF, Fernandez-Gonzalez AJ, Villadas PJ, Robles AB, Toro N, Fernandez-Lopez M. Metagenomic assessment of the potential microbial nitrogen pathways in the rhizosphere of a mediterranean forest after a wildfire. Microbial ecology. 2015;69(4):895-904.
11. Delmont TO, Prestat E, Keegan KP, Faubladier M, Robe P, Clark IM, et al. Structure, fluctuation and magnitude of a natural grassland soil metagenome. The ISME journal. 2012;6(9):1677-87.
12. Dini-Andreote F, de Cassia Pereira e Silva M, Triado-Margarit X, Casamayor EO, van Elsas JD, Salles JF. Dynamics of bacterial community succession in a salt marsh chronosequence: evidences for temporal niche partitioning. The ISME journal. 2014;8(10):1989-2001.
13. Fierer N, Lauber CL, Ramirez KS, Zaneveld J, Bradford MA, Knight R. Comparative metagenomic, phylogenetic and physiological analyses of soil microbial communities across nitrogen gradients. The ISME journal. 2012;6(5):1007-17.
14. Fierer N, Leff JW, Adams BJ, Nielsen UN, Bates ST, Lauber CL, et al. Cross-biome metagenomic analyses of soil microbial communities and their functional attributes. Proceedings of the National Academy of Sciences. 2012;109(52):21390-5.
15. Fonseca JP, Hoffmann L, Cabral BCA, Dias VHG, Miranda MR, de Azevedo Martins AC, et al. Contrasting the microbiomes from forest rhizosphere and deeper bulk soil from an Amazon rainforest reserve. Gene. 2018;642:389-97.
16. Gibbons SM, Lekberg Y, Mummey DL, Sangwan N, Ramsey PW, Gilbert JA. Invasive Plants Rapidly Reshape Soil Properties in a Grassland Ecosystem. mSystems. 2017;2(2).
17. Guo J, Cole JR, Zhang Q, Brown CT, Tiedje JM. Microbial Community Analysis with Ribosomal Gene Fragments from Shotgun Metagenomes. Applied and environmental microbiology. 2016;82(1):157-66.
18. Howe A, Yang F, Williams RJ, Meyer F, Hofmockel KS. Identification of the Core Set of Carbon-Associated Genes in a Bioenergy Grassland Soil. PloS one. 2016;11(11):e0166578.
19. Howe AC, Jansson JK, Malfatti SA, Tringe SG, Tiedje JM, Brown CT. Tackling soil diversity with the assembly of large, complex metagenomes. Proceedings of the National Academy of Sciences. 2014;111(13):4904-9.
20. Hultman J, Waldrop MP, Mackelprang R, David MM, McFarland J, Blazewicz SJ, et al. Multi-omics of permafrost, active layer and thermokarst bog soil microbiomes. Nature. 2015;521(7551):208-12.
21. Kavamura VN, Taketani RG, Ferreira C, de Melo IS, Mendes R. The role of species turnover in structuring bacterial communities in a local scale in the cactus rhizosphere. Plant and Soil. 2018;425(1-2):101-12.
22. Kerfahi D, Tripathi BM, Dong K, Kim M, Kim H, Ferry Slik JW, et al. From the High Arctic to the Equator: Do Soil Metagenomes Differ According to Our Expectations? Microbial ecology. 2019;77(1):168-85.
23. Kumaresan D, Cross AT, Moreira-Grez B, Kariman K, Nevill P, Stevens J, et al. Microbial Functional Capacity Is Preserved Within Engineered Soil Formulations Used In Mine Site Restoration. Scientific reports. 2017;7(1):564.
24. Mendes LW, de Lima Brossi MJ, Kuramae EE, Tsai SM. Land-use system shapes soil bacterial communities in Southeastern Amazon region. Applied Soil Ecology. 2015;95:151-60.
25. Mendes LW, Kuramae EE, Navarrete AA, van Veen JA, Tsai SM. Taxonomical and functional microbial community selection in soybean rhizosphere. The ISME journal. 2014;8(8):1577-87.
26. Mendes LW, Raaijmakers JM, de Hollander M, Mendes R, Tsai SM. Influence of resistance breeding in common bean on rhizosphere microbiome composition and function. The ISME journal. 2018;12(1):212-24.
27. Mendes LW, Tsai SM, Navarrete AA, de Hollander M, van Veen JA, Kuramae EE. Soil-borne microbiome: linking diversity to function. Microbial ecology. 2015;70(1):255-65.
28. Meneghine AK, Nielsen S, Varani AM, Thomas T, Carareto Alves LM. Metagenomic analysis of soil and freshwater from zoo agricultural area with organic fertilization. PloS one. 2017;12(12):e0190178.
29. Meyer KM, Klein AM, Rodrigues JL, Nusslein K, Tringe SG, Mirza BS, et al. Conversion of Amazon rainforest to agriculture alters community traits of methane-cycling organisms. Molecular ecology. 2017;26(6):1547-56.
30. Miura T, Niswati A, Swibawa IG, Haryani S, Gunito H, Arai M, et al. Shifts in the composition and potential functions of soil microbial communities responding to a no-tillage practice and bagasse mulching on a sugarcane plantation. Biology and Fertility of Soils. 2015;52(3):307-22.
31. Navarrete AA, Diniz TR, Braga LP, Silva GG, Franchini JC, Rossetto R, et al. Multi-Analytical Approach Reveals Potential Microbial Indicators in Soil for Sugarcane Model Systems. PloS one. 2015;10(6):e0129765.
32. Navarrete AA, Tsai SM, Mendes LW, Faust K, de Hollander M, Cassman NA, et al. Soil microbiome responses to the short-term effects of Amazonian deforestation. Molecular ecology. 2015;24(10):2433-48.
33. Nguyen SG, Ho CT, Lee J-H, Unno T. Metagenomics analysis of methane metabolisms in manure fertilized paddy soil. The Korean Journal of Microbiology. 2016;52(2):157-65.
34. Pan Y, Cassman N, de Hollander M, Mendes LW, Korevaar H, Geerts RH, et al. Impact of long-term N, P, K, and NPK fertilization on the composition and potential functions of the bacterial community in grassland soil. FEMS microbiology ecology. 2014;90(1):195-205.
35. Pandit AS, Joshi MN, Bhargava P, Shaikh I, Ayachit GN, Raj SR, et al. A snapshot of microbial communities from the Kutch: one of the largest salt deserts in the World. Extremophiles : life under extreme conditions. 2015;19(5):973-87.
36. Ridl J, Kolar M, Strejcek M, Strnad H, Stursa P, Paces J, et al. Plants Rather than Mineral Fertilization Shape Microbial Community Structure and Functional Potential in Legacy Contaminated Soil. Frontiers in microbiology. 2016;7:995.
37. Smith CR, Blair PL, Boyd C, Cody B, Hazel A, Hedrick A, et al. Microbial community responses to soil tillage and crop rotation in a corn/soybean agroecosystem. Ecology and evolution. 2016;6(22):8075-84.
38. Souza RC, Hungria M, Cantão ME, Vasconcelos ATR, Nogueira MA, Vicente VA. Metagenomic analysis reveals microbial functional redundancies and specificities in a soil under different tillage and crop-management regimes. Applied Soil Ecology. 2015;86:106-12.
39. Souza RC, Mendes IC, Reis-Junior FB, Carvalho FM, Nogueira MA, Vasconcelos AT, et al. Shifts in taxonomic and functional microbial diversity with agriculture: How fragile is the Brazilian Cerrado? BMC microbiology. 2016;16:42.
40. Stackhouse BT, Vishnivetskaya TA, Layton A, Chauhan A, Pfiffner S, Mykytczuk NC, et al. Effects of simulated spring thaw of permafrost from mineral cryosol on CO2 emissions and atmospheric CH4 uptake. Journal of Geophysical Research: Biogeosciences. 2015;120(9):1764-84.
41. Steven B, Gallegos-Graves LV, Starkenburg SR, Chain PS, Kuske CR. Targeted and shotgun metagenomic approaches provide different descriptions of dryland soil microbial communities in a manipulated field study. Environmental microbiology reports. 2012;4(2):248-56.
42. Su J-Q, Xia Y, Yao H-Y, Li Y-Y, An X-L, Singh BK, et al. Metagenomic assembly unravel microbial response to redox fluctuation in acid sulfate soil. Soil Biology and Biochemistry. 2017;105:244-52.
43. Taketani RG, Kavamura VN, Mendes R, Melo IS. Functional congruence of rhizosphere microbial communities associated to leguminous tree from Brazilian semiarid region. Environmental microbiology reports. 2015;7(1):95-101.
44. Tripathi BM, Edwards DP, Mendes LW, Kim M, Dong K, Kim H, et al. The impact of tropical forest logging and oil palm agriculture on the soil microbiome. Molecular ecology. 2016;25(10):2244-57.
45. Tripathi BM, Moroenyane I, Sherman C, Lee YK, Adams JM, Steinberger Y. Trends in Taxonomic and Functional Composition of Soil Microbiome Along a Precipitation Gradient in Israel. Microbial ecology. 2017;74(1):168-76.
46. Tveit A, Schwacke R, Svenning MM, Urich T. Organic carbon transformations in high-Arctic peat soils: key functions and microorganisms. The ISME journal. 2013;7(2):299-311.
47. Van Goethem MW, Pierneef R, Bezuidt OKI, Van De Peer Y, Cowan DA, Makhalanyane TP. A reservoir of 'historical' antibiotic resistance genes in remote pristine Antarctic soils. Microbiome. 2018;6(1):40.
48. Weigold P, El-Hadidi M, Ruecker A, Huson DH, Scholten T, Jochmann M, et al. A metagenomic-based survey of microbial (de)halogenation potential in a German forest soil. Scientific reports. 2016;6:28958.
49. Zafra G, Taylor TD, Absalon AE, Cortes-Espinosa DV. Comparative metagenomic analysis of PAH degradation in soil by a mixed microbial consortium. Journal of hazardous materials. 2016;318:702-10.
50. Zarraonaindia I, Owens SM, Weisenhorn P, West K, Hampton-Marcell J, Lax S, et al. The soil microbiome influences grapevine-associated microbiota. mBio. 2015;6(2).
51. Zifcakova L, Vetrovsky T, Lombard V, Henrissat B, Howe A, Baldrian P. Feed in summer, rest in winter: microbial carbon utilization in forest topsoil. Microbiome. 2017;5(1):122.
